# Supplementary material for: Computational and experimental studies on the index of antiaromaticity for 4n π-systems (n ≥ 2)
Source: Royal Society of Chemistry journal article supplement (doi:10.1039/c8cc09448a), 2019-01-01
Supplement: c8cc09448a1.pdf [file c8cc09448a1.pdf]

## Computational and experimental study on the index of antiaromaticity in $4n$ $\pi$ -Systems ( $n \geq 2$ )

Tohru Nishinaga\* and Hinako Hamaoka

*Department of Chemistry, Graduate School of Science and Engineering, Tokyo Metropolitan University, Hachioji, Tokyo 192-0397, Japan*

### Contents

|                                                  |     |
|--------------------------------------------------|-----|
| 1. General                                       | S2  |
| 2. Table S1                                      | S3  |
| 3. Fig. S1                                       | S4  |
| 4. Fig. S2                                       | S5  |
| 5. Fig. S3                                       | S6  |
| 6. Table S2                                      | S7  |
| 7. Synthesis                                     | S10 |
| 8. Fig. S4                                       | S13 |
| 9. Cartesian Coordinates of Optimized Structures | S21 |

## General

Theoretical calculations were performed with the Gaussian 09 program.<sup>1</sup> The structures were optimized with the  $\pi$ -moiety being planar structures, although the global minima for most compounds studied in this study were deviated from the planarity. TD-HF and TD-B3LYP calculations were performed with `td(nstate=10)` keyword. NICS calculations were conducted with GIAO method. <sup>1</sup>H and <sup>13</sup>C NMR spectra were recorded on Bruker AV500 or JEOL JNM-270 instruments. Chemical shifts are reported in ppm with reference to tetramethylsilane, using the signal of internal tetramethylsilane or the solvents. APCI mass spectra were recorded on a Bruker MicrOTOFII-SD. Only the more intense or structurally diagnostic mass spectral fragment ion peaks are reported. Electronic absorption spectra were recorded on a SHIMADZU UV-Vis-NIR scanning spectrophotometer (Model UV-3101-PC). Preparative gel-permeation chromatography (GPC) was performed with a JAI LC-08 chromatograph equipped with JAIGEL 1H and 2H columns.

Commercially available reagents were used as received. THF and diisopropylamine were distilled from relevant drying agents prior to use.

Ref. 1. Gaussian 09, Revision D.01, Frisch, M. J.; Trucks, G. W.; Schlegel, H. B.; Scuseria, G. E.; Robb, M. A.; Cheeseman, J. R.; Scalmani, G.; Barone, V.; Mennucci, B.; Petersson, G. A.; Nakatsuji, H.; Caricato, M.; Li, X.; Hratchian, H. P.; Izmaylov, A. F.; Bloino, J.; Zheng, G.; Sonnenberg, J. L.; Hada, M.; Ehara, M.; Toyota, K.; Fukuda, R.; Hasegawa, J.; Ishida, M.; Nakajima, T.; Honda, Y.; Kitao, O.; Nakai, H.; Vreven, T.; Montgomery, Jr., J. A.; Peralta, J. E.; Ogliaro, F.; Bearpark, M.; Heyd, J. J.; Brothers, E.; Kudin, K. N.; Staroverov, V. N.; Kobayashi, R.; Normand, J.; Raghavachari, K.; Rendell, A.; Burant, J. C.; Iyengar, S. S.; Tomasi, J.; Cossi, M.; Rega, N.; Millam, J. M.; Klene, M.; Knox, J. E.; Cross, J. B.; Bakken, V.; Adamo, C.; Jaramillo, J.; Gomperts, R.; Stratmann, R. E.; Yazyev, O.; Austin, A. J.; Cammi, R.; Pomelli, C.; Ochterski, J. W.; Martin, R. L.; Morokuma, K.; Zakrzewski, V. G.; Voth, G. A.; Salvador, P.; Dannenberg, J. J.; Dapprich, S.; Daniels, A. D.; Farkas, O.; Foresman, J. B.; Ortiz, J. V.; Cioslowski, J.; Fox, D. J. Gaussian, Inc., Wallingford CT, 2009.

**Table S1** Comparison of NICS (ppm) of 4n  $\pi$ -Systems Calculated with Various Methods

| Compd <sup>a</sup>              | GIAO-HF <sup>b</sup>   |                       | GIAO-B3LYP <sup>b,c</sup> |                       | GIAO-M06-2X <sup>b,d</sup> |                       | GIAO-PBE1PBE <sup>b,e</sup> |                       | GIAO-BLYP <sup>b,f</sup> |                       | GIAO-CASSCF            |                       | IGLO                   |
|---------------------------------|------------------------|-----------------------|---------------------------|-----------------------|----------------------------|-----------------------|-----------------------------|-----------------------|--------------------------|-----------------------|------------------------|-----------------------|------------------------|
|                                 | NICS(0) <sub>iso</sub> | NICS(1) <sub>zz</sub> | NICS(0) <sub>iso</sub>    | NICS(1) <sub>zz</sub> | NICS(0) <sub>iso</sub>     | NICS(1) <sub>zz</sub> | NICS(0) <sub>iso</sub>      | NICS(1) <sub>zz</sub> | NICS(0) <sub>iso</sub>   | NICS(1) <sub>zz</sub> | NICS(0) <sub>iso</sub> | NICS(1) <sub>zz</sub> | NICS(0) <sub>iso</sub> |
| <b>8A</b> (D <sub>4h</sub> )    | 26.66                  | 62.56                 | 41.51                     | 99.42                 | 39.88                      | 93.90                 | 41.10                       | 98.28                 | 44.90                    | 107.88                | 16.10 <sup>g</sup>     | 37.62 <sup>g</sup>    | 35.9 <sup>h</sup>      |
| <b>12A</b> (D <sub>2h</sub> )   | 13.18                  | 27.53                 | 24.40                     | 57.47                 | 22.13                      | 51.11                 | 23.64                       | 55.83                 | 28.37                    | 67.96                 | –                      | –                     | 24.5 <sup>h</sup>      |
| <b>16A</b> (D <sub>2h</sub> )   | 8.31                   | 20.50                 | 21.53                     | 56.60                 | 15.38                      | 39.60                 | 20.55                       | 54.09                 | 27.21                    | 71.95                 | –                      | –                     | 23.4 <sup>h</sup>      |
| <b>20A</b> (D <sub>2h</sub> )   | 5.17                   | 13.94                 | 18.32                     | 50.52                 | 11.08                      | 30.35                 | 17.11                       | 47.27                 | 25.29                    | 69.81                 | –                      | –                     | 21.5 <sup>h</sup>      |
| <b>24A</b> (C <sub>s</sub> )    | 3.18                   | 9.11                  | 14.57                     | 41.50                 | 7.82                       | 22.30                 | 13.37                       | 38.14                 | 21.76                    | 61.79                 | –                      | –                     | 19.3 <sup>h</sup>      |
| <b>2D12A</b> (D <sub>2h</sub> ) | 12.16                  | 36.82                 | 28.22                     | 78.1                  | 22.74                      | 63.58                 | 27.27                       | 75.71                 | 33.53                    | 91.77                 | –                      | –                     |                        |
| <b>3D12A</b> (D <sub>3h</sub> ) | 8.85                   | 25.80                 | 20.00                     | 53.97                 | 16.05                      | 43.69                 | 19.44                       | 52.64                 | 23.48                    | 62.83                 | –                      | –                     |                        |
| <b>4D16A</b> (D <sub>2h</sub> ) | 6.08                   | 21.76                 | 20.08                     | 57.61                 | 13.88                      | 41.85                 | 19.01                       | 54.82                 | 26.08                    | 73.03                 | –                      | –                     |                        |
| <b>3D16A</b> (C <sub>2v</sub> ) | 8.52                   | 23.94                 | 26.02                     | 71.03                 | 18.40                      | 50.31                 | 24.78                       | 67.75                 | 33.03                    | 89.85                 | –                      | –                     |                        |
| <b>3D20A</b> (C <sub>2v</sub> ) | 5.25                   | 15.36                 | 20.63                     | 58.01                 | 12.82                      | 36.14                 | 19.31                       | 54.35                 | 28.18                    | 78.82                 | –                      | –                     |                        |
| <b>3D24A</b> (C <sub>2v</sub> ) | 3.43                   | 10.41                 | 16.70                     | 47.74                 | 9.59                       | 27.30                 | 15.33                       | 43.94                 | 24.52                    | 69.55                 | –                      | –                     |                        |
| <b>2</b> (D <sub>2h</sub> )     | 27.17                  | 57.79                 | 26.45                     | 56.02                 | 31.91                      | 63.12                 | 26.86                       | 56.80                 | 26.08                    | 55.48                 | 18.42 <sup>i</sup>     | 39.27 <sup>i</sup>    | 20.8 <sup>h</sup>      |
| <b>3</b> (C <sub>2v</sub> )     | 16.57                  | 29.61                 | 19.96                     | 37.33                 | 21.35                      | 35.81                 | 19.88                       | 36.82                 | 20.88                    | 39.62                 | –                      | –                     | 18.2 <sup>j</sup>      |
| <b>4</b> (C <sub>2h</sub> )     | 17.92                  | 42.35                 | 24.98                     | 58.80                 | 26.04                      | 58.55                 | 24.87                       | 58.56                 | 26.52                    | 62.26                 | –                      | –                     |                        |
| <b>5</b> (C <sub>2h</sub> )     | 12.92                  | 30.68                 | 21.46                     | 50.26                 | 24.57                      | 55.66                 | 21.59                       | 50.73                 | 20.76                    | 47.74                 | –                      | –                     |                        |
| <b>6</b> (D <sub>2h</sub> )     | 12.95                  | 28.48                 | 17.67                     | 38.99                 | 17.72                      | 36.40                 | 17.51                       | 38.64                 | 18.97                    | 41.92                 | –                      | –                     |                        |

<sup>a</sup> See Scheme 1 in the main text for the structural drawings. <sup>b</sup> With 6-311+G(d,p) basis set at the B3LYP/6-31G(d,p) optimized geometry. <sup>c</sup> 20% HF exchange. <sup>d</sup> 56% HF exchange. <sup>e</sup> 25% HF exchange. <sup>f</sup> Pure DFT (0% HF exchange). <sup>g</sup> CASSCF-GIAO/ 6-311+G(d)//CASSCF(8,8)/6-31G(d,p). Karadakov *J. Phys. Chem. A*, **2008**, *112*, 12709. <sup>h</sup> IGLO/TZ2P//B3LYP/6-31G(d). Schleyer et al. *Org. Lett.* **2003**, *5*, 2983. <sup>i</sup> CASSCF-GIAO/ 6-311++G(2d,2p)//CASSCF(4,4)/ 6-311++G(2d,2p). Karadakov, P. B. *J. Phys. Chem. A* **2008**, *112*, 7303. <sup>j</sup> PW91/IGLO-III//B3LYP/6-311+G\*\*. Schleyer et al. *Org. Lett.* **2006**, *8*, 2983.

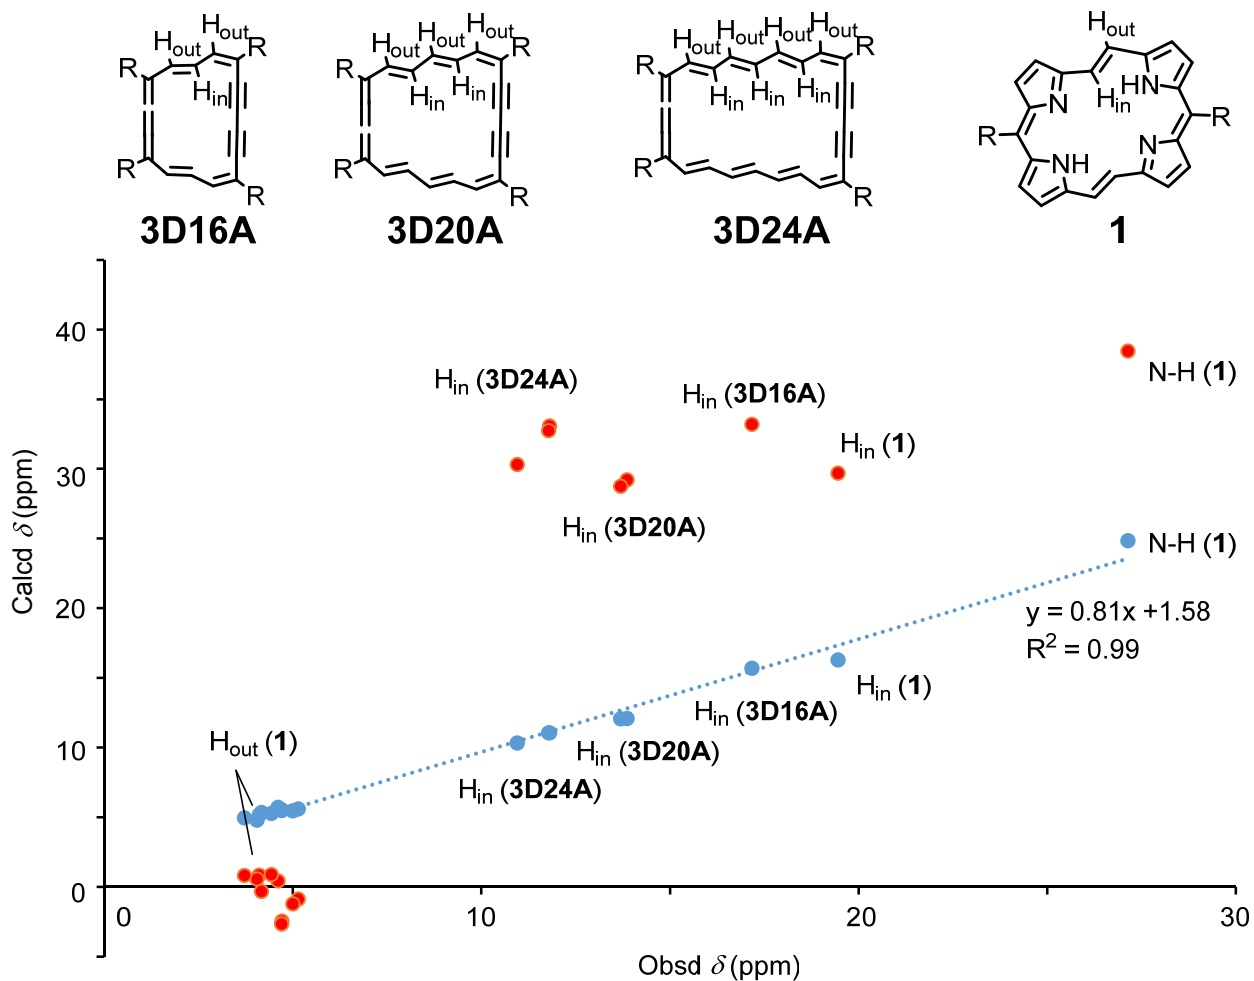

**Fig. S1** Plot of observed vs calculated  $^1\text{H}$  NMR chemical shifts. The blue and red circles were results calculated at the GIAO-HF/6-311G+(d,p) and GIAO-B3LYP/6-311G+(d,p) level, respectively, with the optimized structures at the B3LYP/6-31G(d,p) level. Only the results from the HF method showed a linear relation with the experimental values; **3D16A**(R = *t*-Bu): Nakatsuji et al. *Tetrahedron. Lett.* **1975**, *16*, 1233; **3D20A**(R = *t*-Bu): Nakatsuji et al. *Tetrahedron. Lett.* **1975**, *16*, 3927; **3D24A**(R = *t*-Bu): Nakatsuji et al. *Tetrahedron. Lett.* **1976**, *17*, 2623; **1** (R = Mes): Tanaka et al, *Angew. Chem. Int. Ed.* **2016**, *55*, 8095.

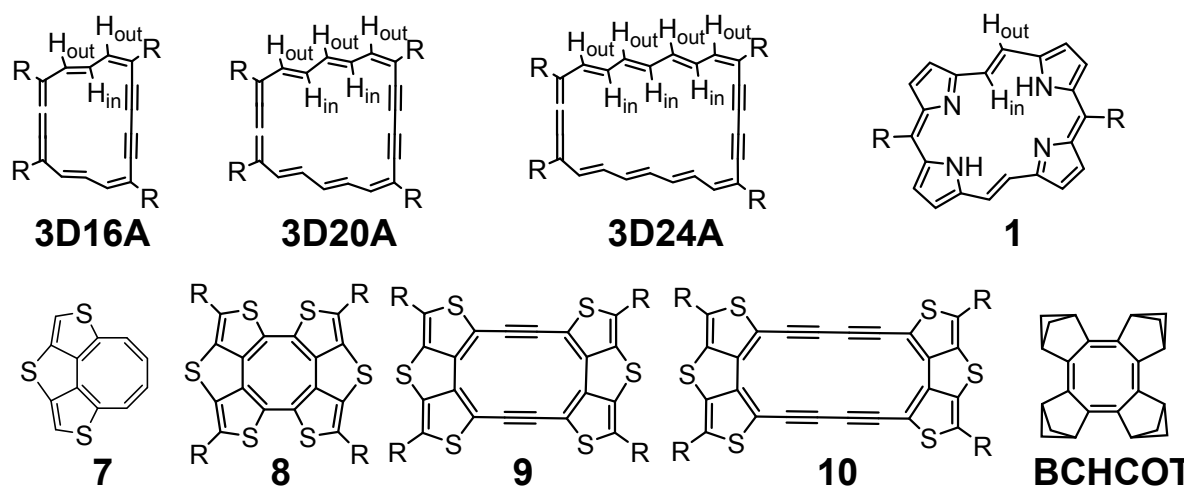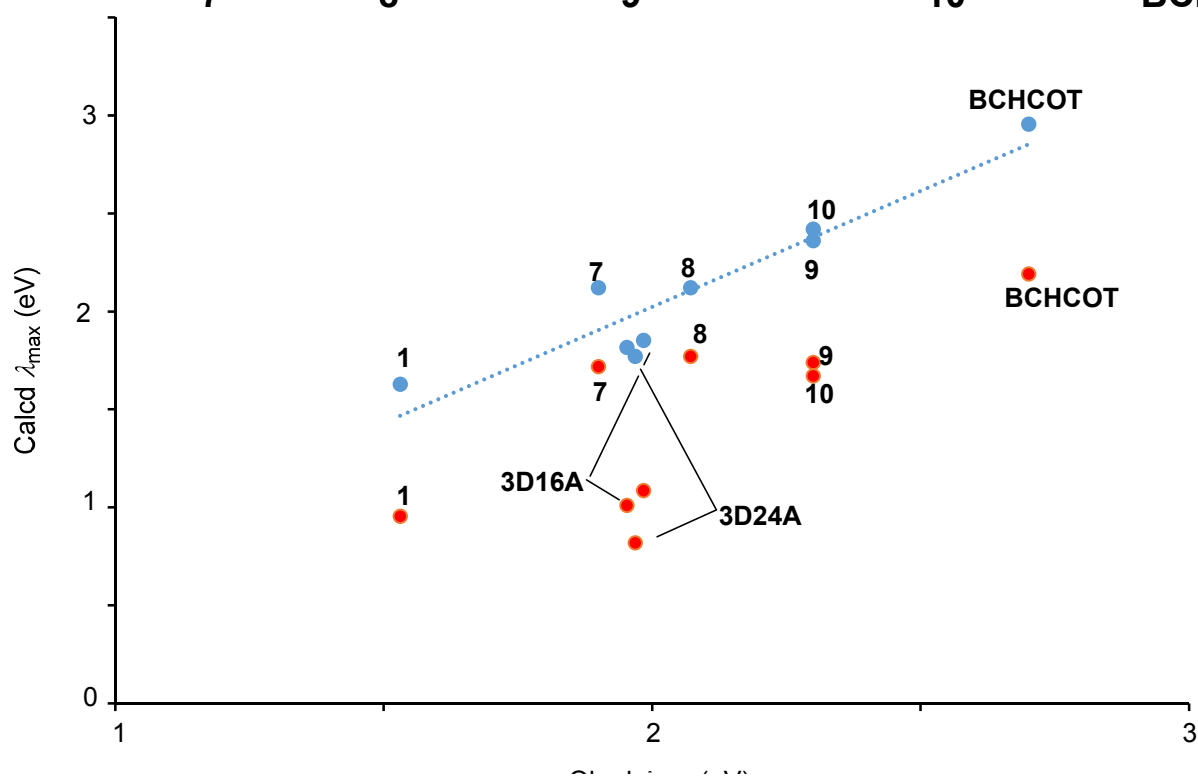

**Fig. S2** Plot of observed vs calculated the longest absorption maximum. The blue and red circles were results calculated at the TD-HF/6-311G+(d,p) and TD-B3LYP/6-311G+(d,p) level, respectively, with the optimized structures at the B3LYP/6-311G(d,p) level. The results from the HF method showed a better linear relation with the experimental values; **3D16A**(R = *t*-Bu): Nakatsuji et al. *Tetrahedron. Lett.* **1975**, *16*, 1233; **3D20A**(R = *t*-Bu): Nakatsuji et al. *Tetrahedron. Lett.* **1975**, *16*, 3927; **3D24A**(R = *t*-Bu): Nakatsuji et al. *Tetrahedron. Lett.* **1976**, *17*, 2623; **1** (R = Mes): Tanaka et al, *Angew. Chem. Int. Ed.* **2016**, *55*, 8095; **7**: Aita et al. *Org. Lett.* **2013**, *15*, 3522; **8-10** (R = Mes): Nishinaga et al. *Org. Lett.* **2018**, *20*, 3426; **BHCOT**: Matsuura et al. *J. Am. Chem. Soc.* **2001**, *123*, 1768. For **7-10**, no clear absorption maxima was observed and the energy of the absorption cut-off + 0.3 eV were used.

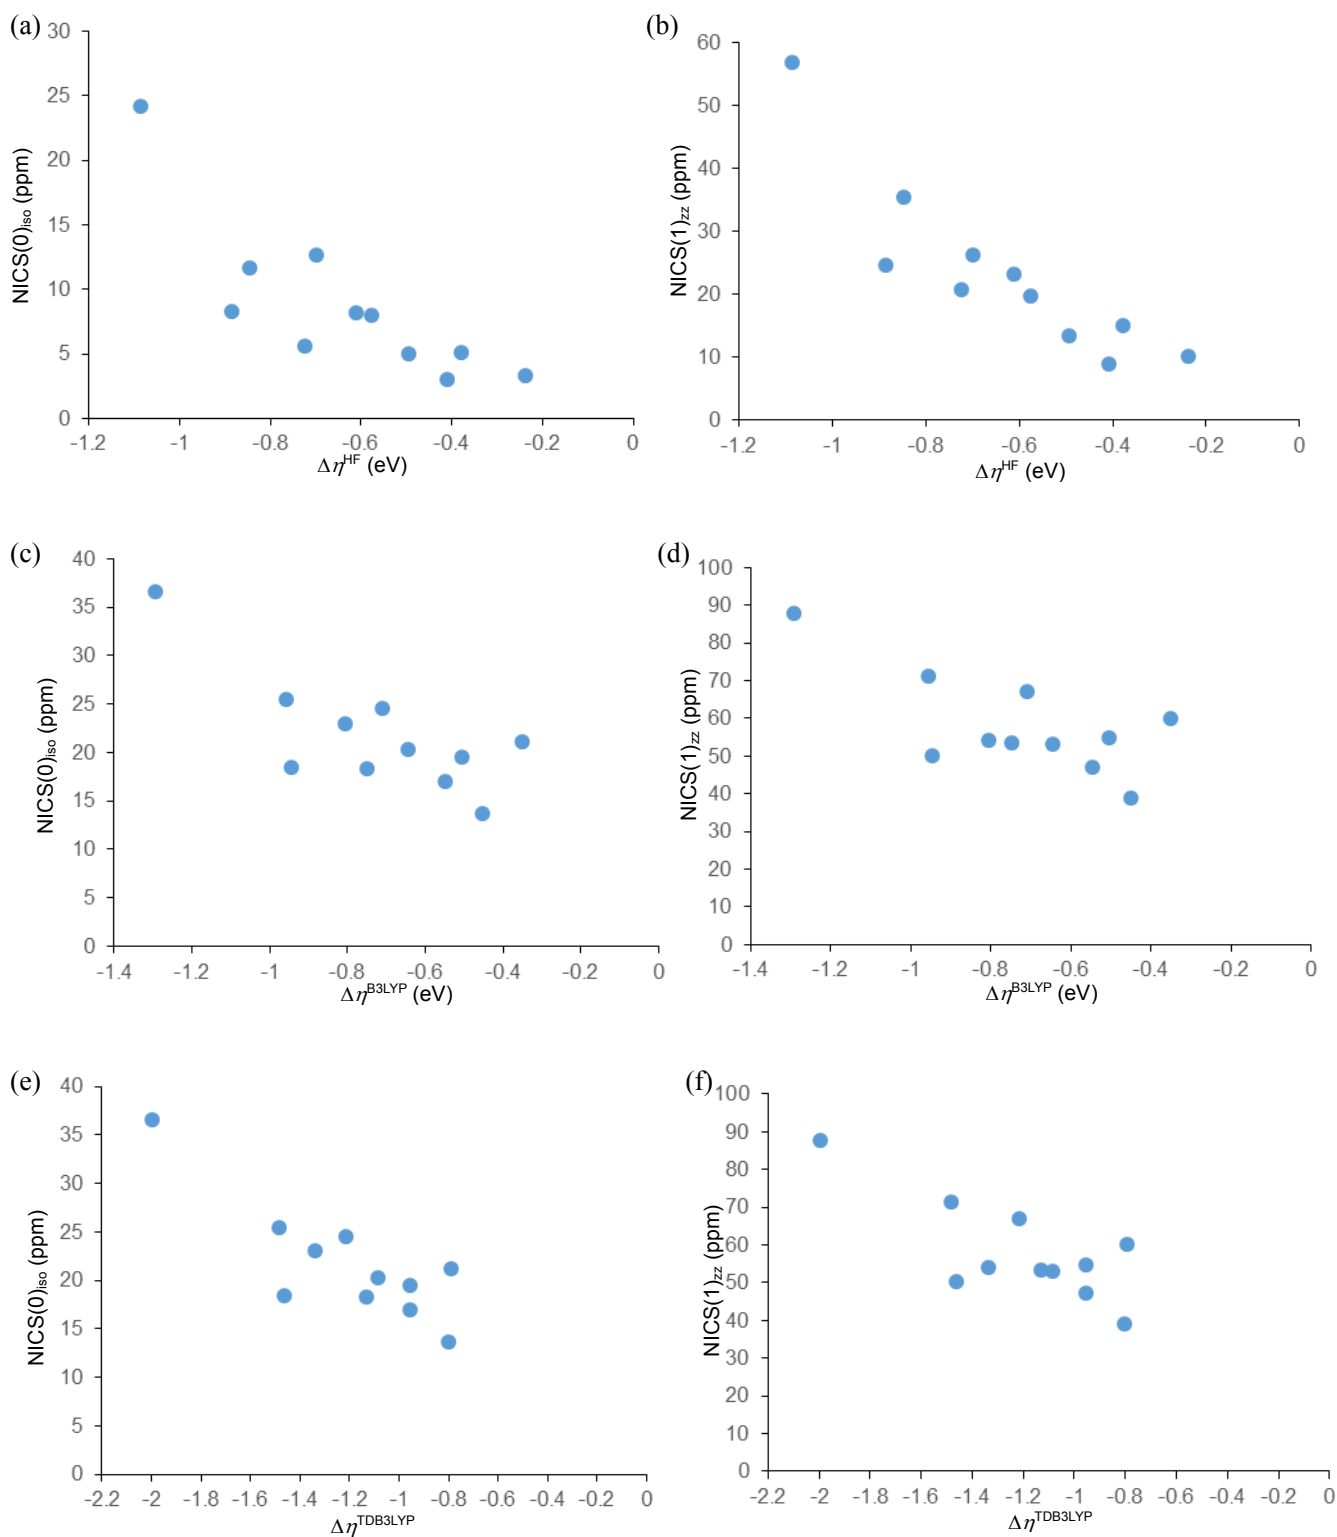

**Fig. S3** Plot of (a) calculated HOMO-LUMO gap with the HF method ( $\Delta\eta^{\text{HF}}$ ) vs.  $\text{NICS}(0)_{\text{iso}}^{\text{HF}}$ , (b)  $\Delta\eta^{\text{HF}}$  vs.  $\text{NICS}(1)_{\text{zz}}^{\text{HF}}$ , (c) calculated HOMO-LUMO gap with the B3LYP method ( $\Delta\eta^{\text{B3LYP}}$ ) vs.  $\text{NICS}(0)_{\text{iso}}^{\text{B3LYP}}$ , (d)  $\Delta\eta^{\text{B3LYP}}$  vs.  $\text{NICS}(1)_{\text{zz}}^{\text{B3LYP}}$ , (e)  $\Delta\eta^{\text{TDB3LYP}}$  vs.  $\text{NICS}(0)_{\text{iso}}^{\text{B3LYP}}$ , and (f)  $\Delta\eta^{\text{TDB3LYP}}$  vs.  $\text{NICS}(1)_{\text{zz}}^{\text{B3LYP}}$  of 4n (dehydro)annulenes based on the (i) type exocyclic references.

**Table S2.** The lowest excitation energy with the excitation weights in TD-HF calculations<sup>a</sup>

| Compd                                       | Excitation energy |       | Excitation (weight, %)   | Oscillator strength |
|---------------------------------------------|-------------------|-------|--------------------------|---------------------|
|                                             | (eV)              | (nm)  |                          |                     |
| Me- <b>8A</b> ( $C_s$ )                     | 2.056             | 603.1 | H→L (96%)                | 0.0005              |
| type (i) ref for Me- <b>8A</b> ( $C_s$ )    | 4.008             | 309.4 | H→L (88%)                | 0.3005              |
| <b>8A</b> ( $D_{4h}$ )                      | 1.986             | 624.2 | H→L (96%)                | 0.0000              |
| type (ii) ref for <b>8A</b> ( $C_{2h}$ )    | 4.075             | 304.2 | H→L (92%)                | 0.8115              |
| Me- <b>12A</b> ( $C_s$ )                    | 2.228             | 556.6 | H→L (92%)                | 0.0004              |
| type (i) ref for Me- <b>12A</b> ( $C_s$ )   | 3.183             | 389.6 | H→L (81%)                | 0.2353              |
| <b>12A</b> ( $D_{2d}$ )                     | 2.198             | 564.1 | H→L (92%)                | 0.0000              |
| type (ii) ref for <b>12A</b> ( $C_s$ )      | 3.802             | 326.1 | H→L (88%)                | 2.6349              |
| Me- <b>16A</b> ( $C_s$ )                    | 2.151             | 576.5 | H→L (88%)                | 0.0004              |
| type (i) ref for Me- <b>16A</b> ( $C_s$ )   | 2.834             | 437.5 | H→L (76%), H-1→L+1 (11%) | 0.2218              |
| <b>16A</b> ( $D_{2d}$ )                     | 2.116             | 586.0 | H→L (89%)                | 0.0000              |
| type (ii) ref for <b>16A</b> ( $C_s$ )      | 3.359             | 369.1 | H→L (83%)                | 3.5324              |
| Me- <b>20A</b> ( $C_s$ )                    | 2.132             | 581.5 | H→L (83%)                | 0.0007              |
| type (i) ref for Me- <b>20A</b> ( $C_s$ )   | 2.616             | 473.9 | H→L (73%), H-1→L+1 (15%) | 0.2678              |
| <b>20A</b> ( $D_{2h}$ )                     | 2.101             | 590.3 | H→L (83%)                | 0.0000              |
| type (ii) ref for <b>20A</b> ( $C_s$ )      | 3.069             | 404.0 | H→L (79%), H-1→L+2 (11%) | 4.4319              |
| Me- <b>24A</b> ( $C_s$ )                    | 2.098             | 591.0 | H→L (76%)                | 0.0008              |
| type (i) ref for Me- <b>24A</b> ( $C_s$ )   | 2.454             | 505.2 | H→L (67%), H-1→L+1 (16%) | 0.2745              |
| <b>24A</b> ( $C_s$ )                        | 2.072             | 598.3 | H→L (76%)                | 0.0000              |
| type (ii) ref for <b>24A</b>                | 2.887             | 429.5 | H→L (74%), H-1→L+1 (15%) | 5.2474              |
| Me- <b>2D12A</b> ( $C_s$ )                  | 2.197             | 564.4 | H→L (93%)                | 0.0005              |
| type (i) ref for Me- <b>2D12A</b> ( $C_s$ ) | 3.337             | 371.5 | H→L (86%)                | 0.2025              |
| <b>2D12A</b> ( $D_{2h}$ )                   | 2.156             | 575.1 | H→L (93%)                | 0.0000              |
| type (ii) ref for <b>2D12A</b> ( $C_s$ )    | 3.876             | 319.8 | H→L (84%)                | 1.6756              |
| Me- <b>3D12A</b> ( $C_s$ )                  | 2.515             | 493.0 | H→L (92%)                | 0.0005              |
| type (i) ref for Me- <b>3D12A</b> ( $C_s$ ) | 3.653             | 339.4 | H→L (82%)                | 0.2462              |
| <b>3D12A</b> ( $D_{3h}$ )                   | 2.474             | 501.2 | H→L (92%)                | 0.0000              |
| type (ii) ref for <b>3D12A</b> ( $C_s$ )    | 3.800             | 326.3 | H→L (82%)                | 1.2217              |
| Me- <b>4D16A</b> ( $C_s$ )                  | 2.279             | 544.1 | H→L (86%)                | 0.0008              |
| type (i) ref for Me- <b>4D16A</b> ( $C_s$ ) | 3.008             | 412.2 | H→L (78%)                | 0.1595              |
| <b>4D16A</b> ( $D_{2h}$ )                   | 2.233             | 555.2 | H→L (87%)                | 0.0000              |
| type (ii) ref for <b>4D16A</b> ( $C_{2h}$ ) | 3.431             | 361.4 | H→L (71%)                | 1.5524              |
| Me- <b>3D16A</b> (R=H) ( $C_s$ )            | 1.963             | 631.5 | H→L (90%)                | 0.0411              |
| type (i) ref for Me- <b>3D16A</b> ( $C_s$ ) | 2.712             | 457.2 | H→L (85%)                | 0.2356              |
| <b>3D16A</b> (R=H) ( $C_{2v}$ )             | 1.952             | 635.2 | H→L (90%)                | 0.0317              |
| type (ii) ref for <b>3D16A</b> ( $C_{2v}$ ) | 3.115             | 398.0 | H→L (88%)                | 3.0883              |

|                                             |       |       |                          |        |
|---------------------------------------------|-------|-------|--------------------------|--------|
| Me- <b>3D20A</b> (R=H) ( $C_s$ )            | 1.946 | 637.1 | H→L (86%)                | 0.0430 |
| type (i) ref for Me- <b>3D20A</b> ( $C_s$ ) | 2.379 | 521.1 | H→L (84%)                | 0.2495 |
| <b>3D20A</b> (R=H) ( $C_{2v}$ )             | 1.936 | 640.4 | H→L (86%)                | 0.0342 |
| type (ii) ref for <b>3D20A</b> ( $C_{2v}$ ) | 2.815 | 440.4 | H→L (84%)                | 3.9793 |
| Me- <b>3D24A</b> (R=H) ( $C_s$ )            | 1.918 | 646.5 | H→L (81%)                | 0.0477 |
| type (i) ref for Me- <b>3D24A</b> ( $C_s$ ) | 2.162 | 573.6 | H→L (81%)                | 0.2375 |
| <b>3D24A</b> (R=H) ( $C_{2v}$ )             | 1.911 | 648.9 | H→L (81%)                | 0.0389 |
| type (ii) ref for <b>3D24A</b> ( $C_{2v}$ ) | 2.608 | 475.4 | H→L (89%)                | 4.8218 |
| Me- <b>1</b> ( $C_s$ )                      | 1.605 | 772.5 | H→L (89%)                | 0.0003 |
| type (i) ref for Me- <b>2</b> ( $C_s$ )     | 2.219 | 558.7 | H→L (80%), H-1→L+1 (15%) | 0.1100 |
| <b>1</b> (R=H) ( $C_{2h}$ )                 | 1.607 | 771.4 | H→L (89%)                | 0.0000 |
| type (ii) ref for <b>1</b> ( $C_{2s}$ )     | 2.669 | 464.6 | H→L (80%), H-1→L+1 (14%) | 2.2509 |
| Me- <b>2</b> ( $C_s$ )                      | 2.713 | 457.0 | H→L+3 (87%)              | 0.0004 |
| type (i) ref for Me- <b>2</b> ( $C_s$ )     | 5.961 | 208.0 | H→L+3 (65%), H→L+6 (21%) | 0.5882 |
| <b>2</b> ( $D_{2h}$ )                       | 2.653 | 467.3 | H→L (89%)                | 0.0000 |
| type (ii) ref for <b>2</b> ( $C_{2h}$ )     | 5.976 | 207.5 | H→L+2 (88%)              | 0.8516 |
| Me- <b>3</b> ( $C_s$ )                      | 2.954 | 419.7 | H→L (90%)                | 0.0094 |
| type (i) ref for Me- <b>3</b> ( $C_s$ )     | 5.229 | 237.1 | H→L (80%)                | 0.5698 |
| <b>3</b> ( $C_{2v}$ )                       | 2.876 | 431.1 | H→L (93%)                | 0.0110 |
| type (ii) ref for <b>3</b>                  | 5.060 | 245.0 | H→L (87%)                | 0.7098 |
| Me- <b>4</b> ( $C_s$ )                      | 2.151 | 576.4 | H→L (97%)                | 0.0005 |
| type (i) ref for Me- <b>4</b> ( $C_s$ )     | 3.748 | 330.8 | H→L (89%)                | 0.0184 |
| <b>4</b> ( $C_{2h}$ )                       | 2.100 | 590.5 | H→L (97%)                | 0.0000 |
| type (ii) ref for <b>4</b>                  | 3.870 | 320.4 | H→L (75%), H-1→L+1 (17%) | 0.0176 |
| Me- <b>5</b> ( $C_s$ )                      | 1.716 | 722.6 | H→L (94%)                | 0.0003 |
| type (i) ref for Me- <b>5</b> ( $C_s$ )     | 2.736 | 453.2 | H→L (79%), H-1→L (15%)   | 0.2052 |
| <b>5</b> ( $C_{2h}$ )                       | 1.554 | 798.0 | H-1→L (98%) <sup>b</sup> | 0.0000 |
| type (ii) ref for <b>5</b>                  | 2.892 | 428.7 | H→L (71%), H-1→L (16%)   | 0.2555 |
| diMe- <b>6</b> ( $C_s$ )                    | 2.722 | 455.5 | H→L (94%)                | 0.0000 |
| type (i) ref for diMe- <b>6</b> ( $C_s$ )   | 4.033 | 307.5 | H→L (82%)                | 0.5018 |
| <b>6</b> ( $D_{2h}$ )                       | 2.691 | 460.8 | H→L (95%)                | 0.0000 |
| type (ii) ref for <b>6</b> <sup>c</sup>     | 3.998 | 310.1 | H→L (81%)                | 0.4602 |
| Me- <b>5</b> ( $C_s$ )                      | 2.067 | 599.9 | H→L (95%)                | 0.0074 |
| type (ii) ref for <b>5</b>                  | 3.909 | 317.2 | H→L (73%), H-1→L (15%)   | 0.3734 |
| <b>7</b> ( $C_{2v}$ )                       | 2.122 | 584.4 | H→L (95%)                | 0.0079 |
| type (ii) ref for <b>7</b>                  | 3.908 | 317.3 | H→L (86%)                | 0.7377 |
| <b>8</b> ( $D_{2h}$ )                       | 2.237 | 554.3 | H→L (94%)                | 0.0000 |
| type (ii) ref for <b>8</b> ( $C_{2h}$ )     | 3.649 | 339.8 | H→L (85%)                | 0.5052 |
| <b>9</b> ( $D_{2h}$ )                       | 2.444 | 507.2 | H→L (89%)                | 0.0000 |



|                                          |       |       |           |        |
|------------------------------------------|-------|-------|-----------|--------|
| type (ii) ref for <b>9</b> ( $C_s$ )     | 3.320 | 373.5 | H→L (78%) | 0.5266 |
| <b>10</b> ( $D_{2h}$ )                   | 2.486 | 498.8 | H→L (80%) | 0.0000 |
| type (ii) ref for <b>10</b> ( $C_{2h}$ ) | 3.042 | 407.6 | H→L (71%) | 0.5282 |

<sup>a</sup>With 6-311+G(d,p) basis set at the B3LYP/6-31G(d,p) optimized geometry. <sup>b</sup> HOMO and HOMO-1 were nearly degenerate with the energy difference of 0.05 eV.

<sup>c</sup> Two five membered rings were opened.

## Synthesis of type (ii) reference compounds for 7-9

The synthesis of compound **12**<sup>2</sup> and **14**<sup>3</sup> was reported previously. The butadiene moiety in compound **11** was found to be a mixture of cis and trans isomers as observed in the case of the same Wittig reaction from formylthiophene.<sup>4</sup> The TD-HF calculations predicted that the cis isomer of **11** has a slightly longer (i.e., energetically lower) absorption maximum than that of the trans isomer. Consequently, the observed absorption edge was expected to reflect the cis isomer that is the actual reference compound for **7**. Unfortunately, treatment of **21** with TBAF resulted in complex mixtures. Thus, the attempted synthesis of **22** as type (ii) reference compound for **10** was failed. We also conducted the optimization of the structure of **21** at the B3LYP/6-31G(d,p) level and found that two dithienothiophene moieties were perpendicularly arranged due to the presence of the sterically demanding TIPS groups. Therefore, **21** was considered to be inappropriate as the reference for **10**.

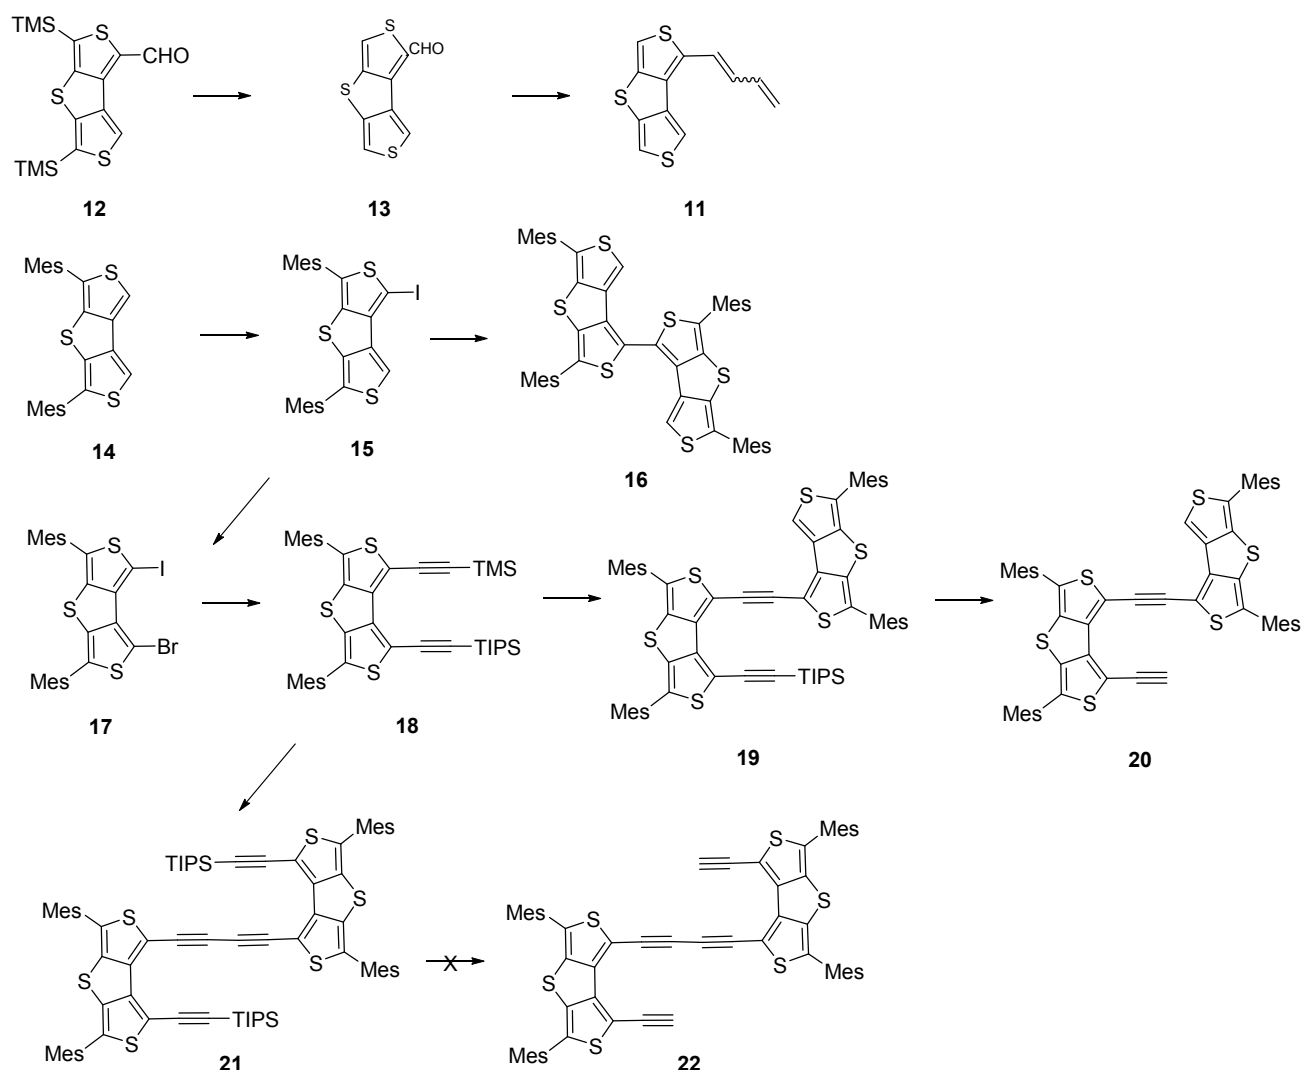

**Scheme S1.** Synthesis of **11**, **16**, and **20** as the type (ii) reference compounds for 7-9

**Synthesis of 11.** To a solution of **12** (102 mg, 0.277 mmol) in THF (1 mL) and conc HCl<sub>aq</sub> (60 mg, ~0.6 mmol) was added TBAF in THF (1.0 M, 0.83 mL) and the mixture was stirred at rt for 90 min. After evaporation and dried in vacuo, the mixture was separated through SiO<sub>2</sub> short column eluted with hexane-dichloromethane (1:1) to give crude **13** (60 mg, 97%) as yellow solid; <sup>1</sup>H NMR (CDCl<sub>3</sub>, 270 MHz) δ 10.01 (s, 1H), 8.40 (m, 1H), 7.47 (m, 1H), 7.11 (m, 1H); <sup>13</sup>C NMR (CDCl<sub>3</sub>, 67.5 MHz) δ 180.5, 145.8, 143.5, 138.9, 135.5, 130.2, 121.33, 121.28, 111.9.

To a solution of allyltriphenylphosphonium bromide (313 mg, 0.816 mmol) in anhydrous THF (2 ml) was added a suspension of *t*-BuOK (61 mg, 0.54 mmol) in anhydrous THF (2 ml) at 0 °C and the mixture was stirred for 1 h under N<sub>2</sub>. To this reaction mixture, **13** (60 mg, 0.27 mmol) in anhydrous THF (2 ml) was added, and the mixture was stirred overnight at room temperature. After standard workup with ether, volatiles were removed in vacuo, and the residue was purified through SiO<sub>2</sub> short column eluted with hexane-dichloromethane (3:2) followed by preparative GPC separation eluted with chloroform to give **11** (15 mg, 0.060 mmol, 22%) as unstable pale yellow solid (easily polymerized in the solid state) which included inseparable trans/cis isomers (5/1 judged by the assignment for 1-(2-thienyl)-1,3-butadiene;<sup>4</sup> the cis derivative seemed to be more labile); <sup>1</sup>H NMR (CDCl<sub>3</sub>, 500 MHz) (trans isomer) δ 7.49 (d, *J* = 2.5 Hz, 1H), 6.88-7.02 (m, 2H), 6.83 (s, 1H), 6.70 (dd, *J* = 10.0, 15.3 Hz, 1H), 6.54 (ddd, *J* = 10.0, 10.0, 16.7 Hz, 1H), 5.39 (d, *J* = 16.7 Hz, 1H), 5.24 (d, *J* = 10.0 Hz, 1H); (cis isomer) δ 7.43 (d, *J* = 2.5 Hz, 1H), 6.88-7.10 (m, 3H), 6.79 (d, *J* = 11.5 Hz, 1H), 6.32 (dd, *J* = 11.5, 11.5 Hz, 1H), 5.49 (d, *J* = 16.5 Hz, 1H), 5.35 (partially overlapped to the signal of trans isomer); <sup>13</sup>C NMR (CDCl<sub>3</sub>, 125 MHz) (trans+cis) δ 143.1, 143.04, 142.97, 142.7, 136.4, 136.21, 136.15, 134.6, 133.4, 133.2, 132.2, 130.8, 130.4, 129.7, 123.5, 121.3, 120.4, 118.8, 114.9, 114.5, 111.6, 111.4, 111.3, 110.1; MS(APCI-TOF) calcd for C<sub>12</sub>H<sub>9</sub>S<sub>3</sub> [(M+H)<sup>+</sup>] = 249; found 249.

**Synthesis of 16.** To a solution of **14** (195 mg, 0.45 mmol) in chloroform (4.5 ml) was added NIS (106 mg, 0.47 mmol). The reaction mixture was stirred at rt in the dark overnight. After evaporation, the residue was separated by silica gel column chromatography using hexane as eluent to give crude **15** (244 mg) as colorless solid (which was gradually turned pink under room light).

To a solution of crude **15** (27 mg, 0.048 mmol), Pd(OAc)<sub>2</sub> (0.54 mg, 0.0024 mmol) and tetrabutylammonium bromide (7.7 mg, 0.024 mmol) in dry toluene (1 mL) was added diisopropylethylamine (6.2 mg, 0.048 mmol) under N<sub>2</sub>. The reaction mixture was refluxed overnight. After evaporation, the residue was separated by silica gel column chromatography using hexane as eluent to give crude **16** (10 mg, 0.011 mmol, 48%) as pale yellow solid which was further purified by recrystallization from dichloromethane/ethanol; <sup>1</sup>H NMR (CDCl<sub>3</sub>, 500 MHz) δ 7.56 (s, 2H), 6.94 (s, 4H), 6.90 (s, 4H), 2.2-2.3 (m, 24H), 2.17 (s, 12H); <sup>13</sup>C NMR (CDCl<sub>3</sub>, 125 MHz) δ 141.0, 140.3, 138.83, 138.79, 138.4, 135.0, 134.8, 129.9, 129.6, 128.3, 127.1, 115.9, 107.3, 104.7, 99.7, 98.2, 21.1, 20.3, 18.9, 11.7, 0.1; MS(APCI-TOF) calcd for C<sub>52</sub>H<sub>46</sub>S<sub>6</sub> [M<sup>+</sup>] = 862; found 862.

**Synthesis of 18.** To a solution of crude **15** (244 mg, 0.437 mmol) in chloroform (4 mL) and acetic acid (4 mL) was added NBS (82 mg, 0.46 mmol) under N<sub>2</sub>. The reaction mixture was stirred at rt for 2 h. After quenching with aqueous Na<sub>2</sub>CO<sub>3</sub>, the organic layer was extracted with dichloromethane. The combined organic layer was dried over MgSO<sub>4</sub>. After filtration and evaporation, the residue was separated by silica gel column chromatography using hexane as eluent to give crude **17** (258 mg) as colorless solid.

To a solution of this crude **17**, Pd (PPh<sub>3</sub>)<sub>4</sub> (24 mg, 0.020 mmol), CuI (8 mg, 0.04 mmol) in dry toluene (4 mL) and dry diisopropylamine (0.8 mL) under N<sub>2</sub> was added TMS-acetylene (0.061 mL, 0.44 mmol). The mixture was stirred in a seal tube at rt for 19h. Then, TIPS-acetylene (0.14 mL, 0.60 mmol) and additional Pd (PPh<sub>3</sub>)<sub>4</sub> (24 mg, 0.020 mmol) and CuI (8 mg, 0.04 mmol) was added to this reaction mixture and stirred at 90 °C overnight. After removal of volatiles, the residue was purified by silica gel column chromatography with hexane as eluent, followed by preparative GPC separation eluted with chloroform to give **18** (82 mg, 0.12 mmol, 26% from **15**) as pale yellow solid; <sup>1</sup>H NMR (CDCl<sub>3</sub>, 270 MHz) δ 6.86 (s, 4H), 2.26 (s, 6H), 2.14 (s, 12H), 1.3-1.9 (m, 21 H), 0.28 (s, 9H); <sup>13</sup>C NMR (CDCl<sub>3</sub>, 67.5 MHz) δ 141.0, 138.9, 138.4, 135.7, 129.7, 128.3, 127.1, 115.3, 106.8, 97.8, 21.1, 20.2, 0.1; MS(APCI-TOF) calcd for C<sub>42</sub>H<sub>53</sub>S<sub>3</sub>Si<sub>2</sub> [(M+H)<sup>+</sup>] = 709; found 709.

**Synthesis of 20** To a solution of **18** (49 mg, 0.069 mmol) in dichloromethane (1 ml) and methanol (1 mL) was added  $K_2CO_3$  (23 mg, 0.17 mmol) under  $N_2$  and the mixture was stirred at rt for 3 h. The volatiles was evaporated and the residue was separated by silica gel column chromatography using hexane as eluent to give crude TMS deprotected product (41 mg) as pale yellow solid. A mixture of this crude ethynyl compound, crude **15** prepared from **14** (31 mg, 0.071 mmol),  $Pd(PPh_3)_4$  (8 mg, 0.007 mmol),  $CuI$  (3 mg, 0.01 mmol) was dissolved in toluene (2 mL) and diisopropylamine (0.4 mL) and stirred at 90 °C overnight. After removal of volatiles, the residue was purified by silica gel column chromatography with hexane-dichloromethane (9:1) as eluent, followed by preparative GPC separation eluted with chloroform to give **19** (53 mg, 0.049 mmol, 72% from **18**) as pale yellow solid;  $^1H$  NMR ( $CDCl_3$ , 500 MHz)  $\delta$  7.98 (s, 1H), 6.8-6.9 (m, 8H), 2.1-2.3 (m, 36H), 0.9-1.0 (m, 21 H);  $^{13}C$  NMR ( $CDCl_3$ , 125 MHz)  $\delta$  141.2, 141.0, 140.9, 140.8, 139.8, 139.0, 138.9, 138.5, 138.4, 136.4, 136.1, 135.4, 130.9, 130.4, 129.7, 128.39, 128.37, 128.35, 128.25, 127.8, 127.7, 127.4, 127.1, 117.3, 116.0, 114.7, 112.3, 105.1, 99.3, 92.1, 90.3, 21.1, 20.5, 20.40, 20.37, 20.35, 18.8, 11.7.

To a solution of **19** (25 mg, 0.023 mmol) in wet THF (2 ml) was added TBAF in THF (1.0 M 0.06 mL) and the mixture was stirred at rt for 2 h. After removal of volatiles, the residue was purified by silica gel column chromatography with hexane-dichloromethane (9:1) as eluent, followed by preparative GPC separation eluted with chloroform to give **20** (20 mg, 0.049 mmol, 95%) as pale yellow solid;  $^1H$  NMR ( $CDCl_3$ , 500 MHz)  $\delta$  7.91 (s, 1H), 6.8-6.9 (m, 8H), 3.72 (s, 1H), 2.1-2.3 (m, 36H);  $^{13}C$  NMR ( $CDCl_3$ , 125 MHz)  $\delta$  141.4, 141.2, 141.0, 140.9, 139.14, 139.06, 138.96, 138.6, 138.5, 138.44, 138.40, 137.08, 135.8, 130.4, 130.0, 129.7, 128.41, 128.39, 128.26, 128.0, 127.7, 127.2, 126.9, 117.0, 114.5, 113.6, 112.0, 91.7, 90.9, 87.9, 21.11, 21.09, 20.41, 20.35, 20.39; MS(APCI-TOF) calcd for  $C_{56}H_{47}S_6$   $[(M+H)^+]$  = 911; found 911.

**Synthesis of 21** TMS deprotected product of **18** (31 mg, 0.044 mmol) was synthesized as shown above. To a mixture of this crude product,  $Pd(PPh_3)_4$  (5 mg, 0.004 mmol),  $CuI$  (0.8 mg, 0.004 mmol) in dry THF (1 mL) and dry diisopropylamine (1 mL) under  $N_2$  was added  $I_2$  (5.6 mg, 0.022 mmol) in THF under  $N_2$ . The reaction mixture was heated at 40 °C overnight. After removal of volatiles, the residue was purified by silica gel column chromatography with hexane-ether (50:1) as eluent, followed by preparative GPC separation eluted with chloroform to give **21** (19 mg, 0.015 mmol, 68%) as pale yellow solid;  $^1H$  NMR ( $CDCl_3$ , 500 MHz)  $\delta$  6.885 (s, 4H), 6.873 (s, 4H), 2.273 (s, 6H), 2.266 (s, 6H), 2.15 (s, 12H), 2.14 (s, 12H). 1.0-1.2 (m, 21H);  $^{13}C$  NMR ( $CDCl_3$ , 125 MHz)  $\delta$  141.3, 140.7, 139.1, 138.8, 138.7, 138.37, 138.33, 135.0, 131.5, 129.4, 128.4, 128.3, 127.1, 127.0, 116.8, 113.6, 105.4, 98.6, 86.0, 78.5, 21.1, 20.3, 20.2, 18.9, 18.8, 11.7; MS(APCI-TOF) calcd for  $C_{56}H_{47}S_6$   $[(M+H)^+]$  = 1271; found 1271.

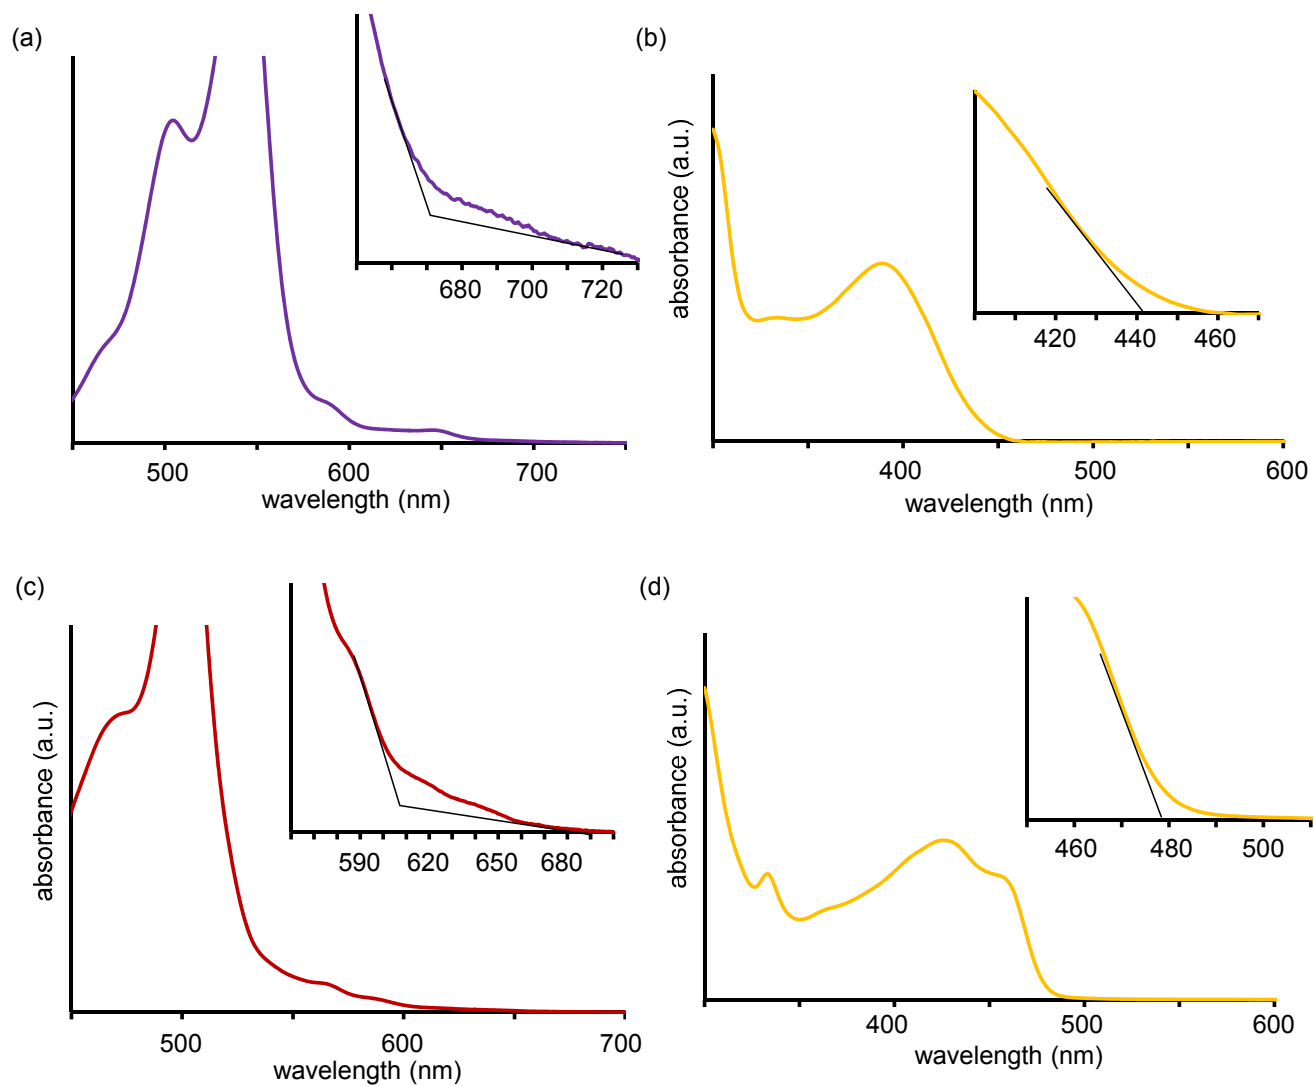

**Fig. S4.** Absorption spectra (inset: enlargement in the region of absorption edge) of (a) **8** and (c) **9** and (c) their acyclic reference (c) **16** and (d) **20**.

<sup>1</sup>H NMR of 13

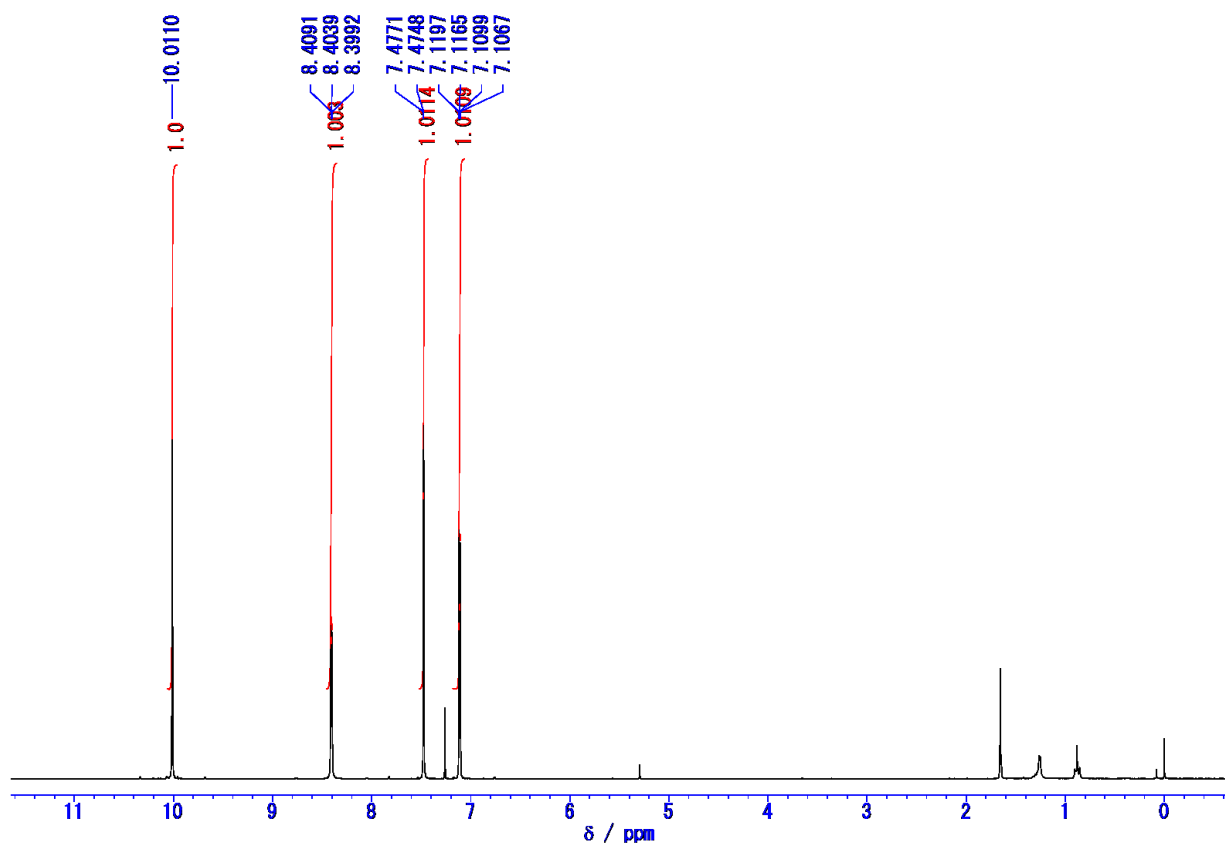

<sup>13</sup>C NMR of 13

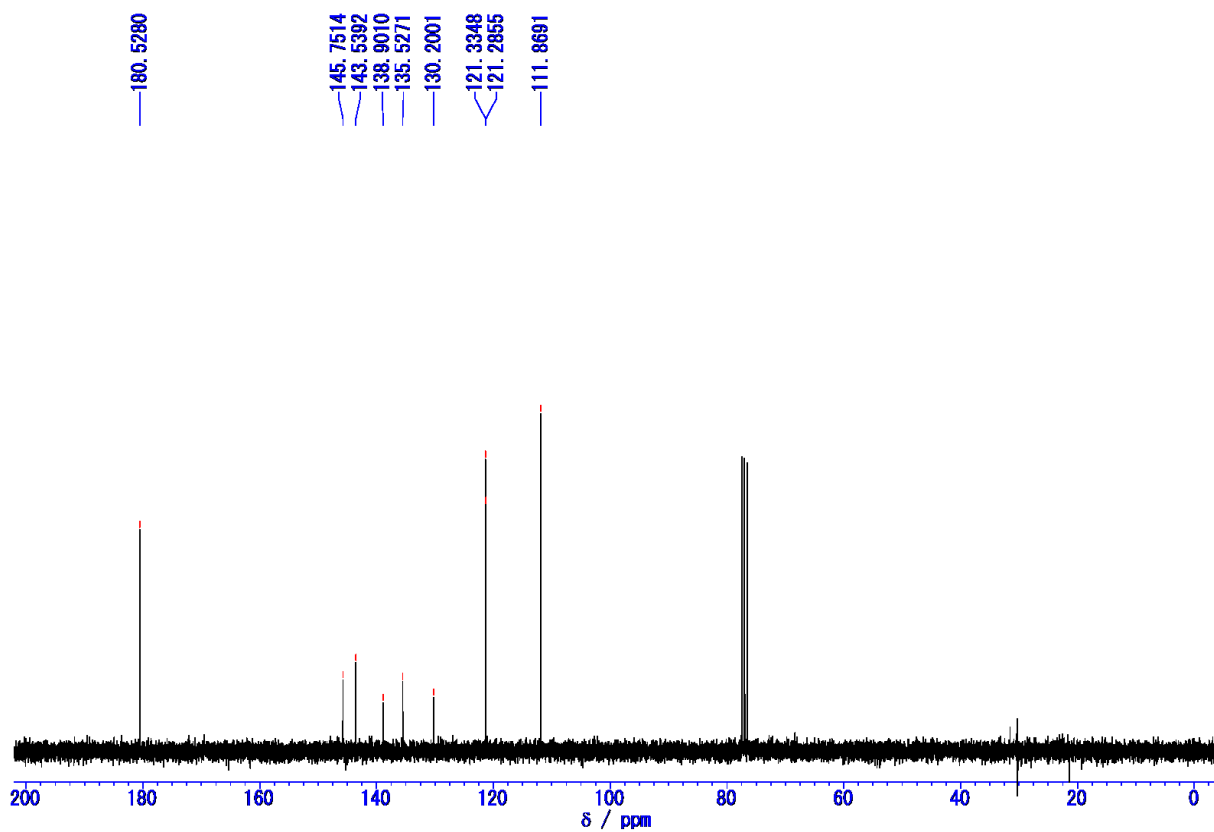

<sup>1</sup>H NMR of **11**

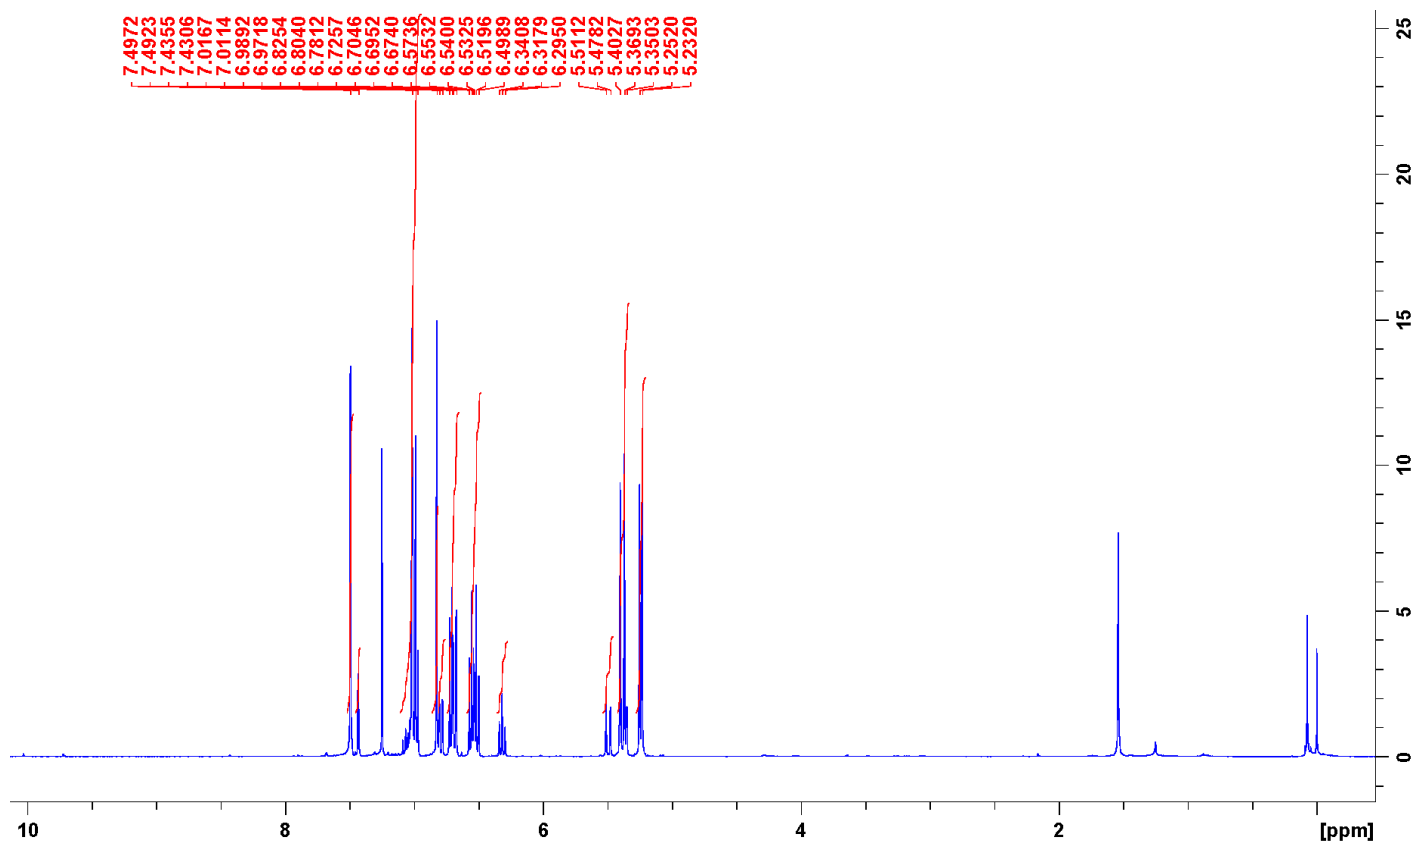

<sup>13</sup>C NMR of **11**

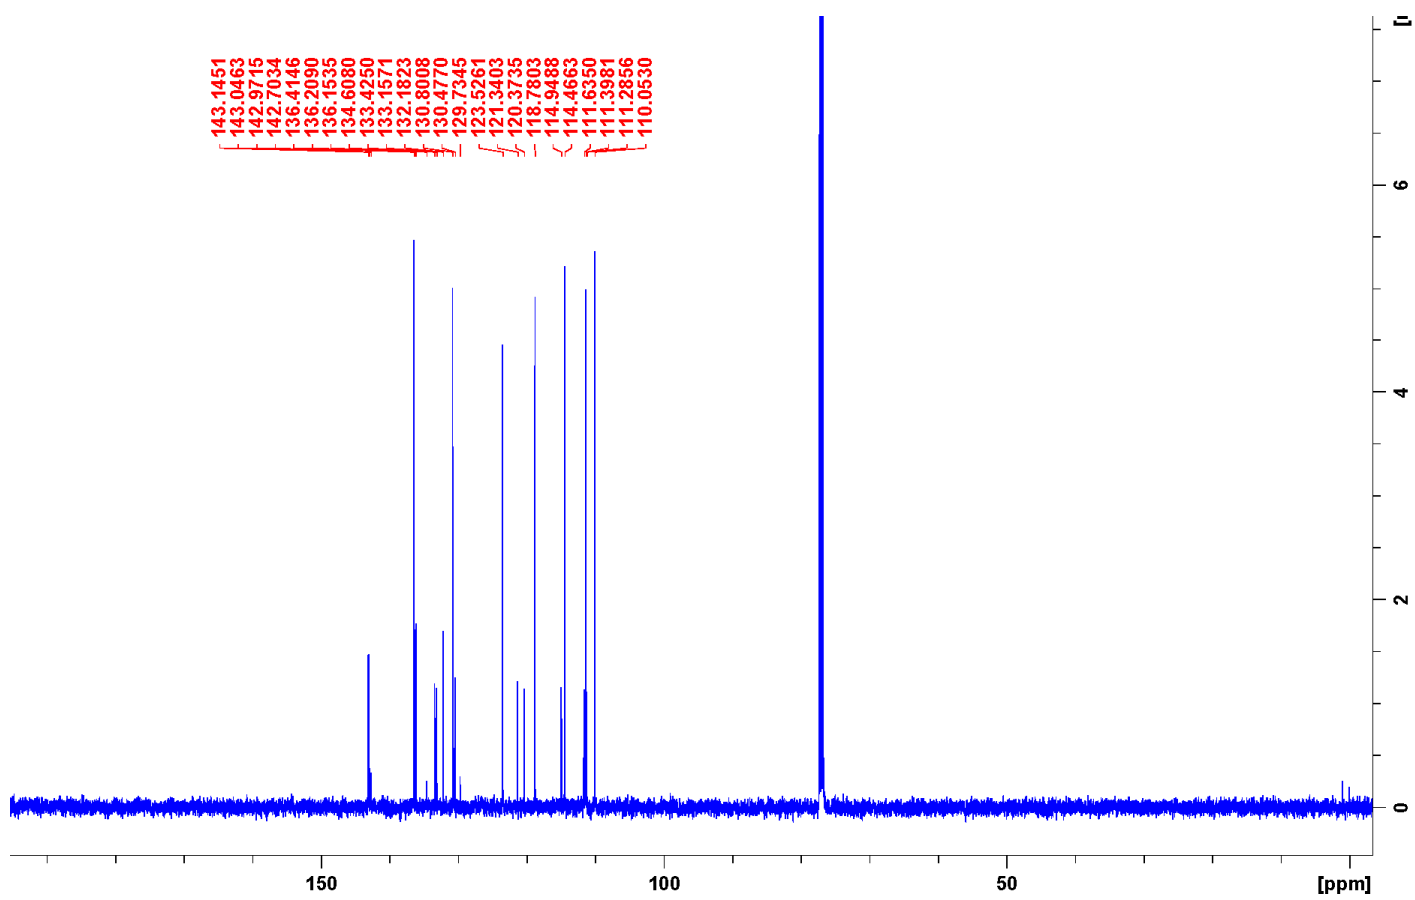

<sup>1</sup>H NMR of 16

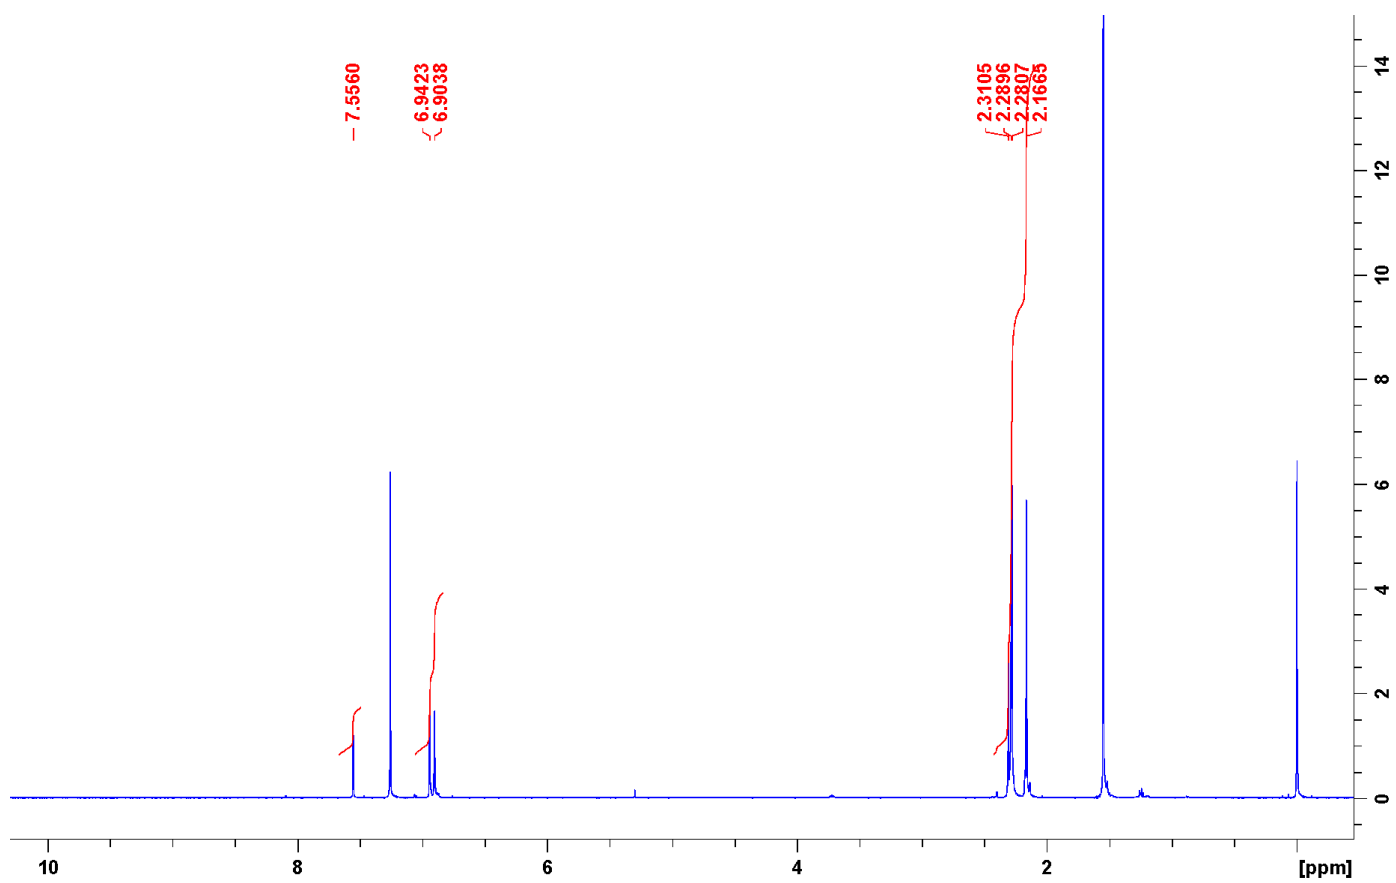

<sup>13</sup>C NMR of 16

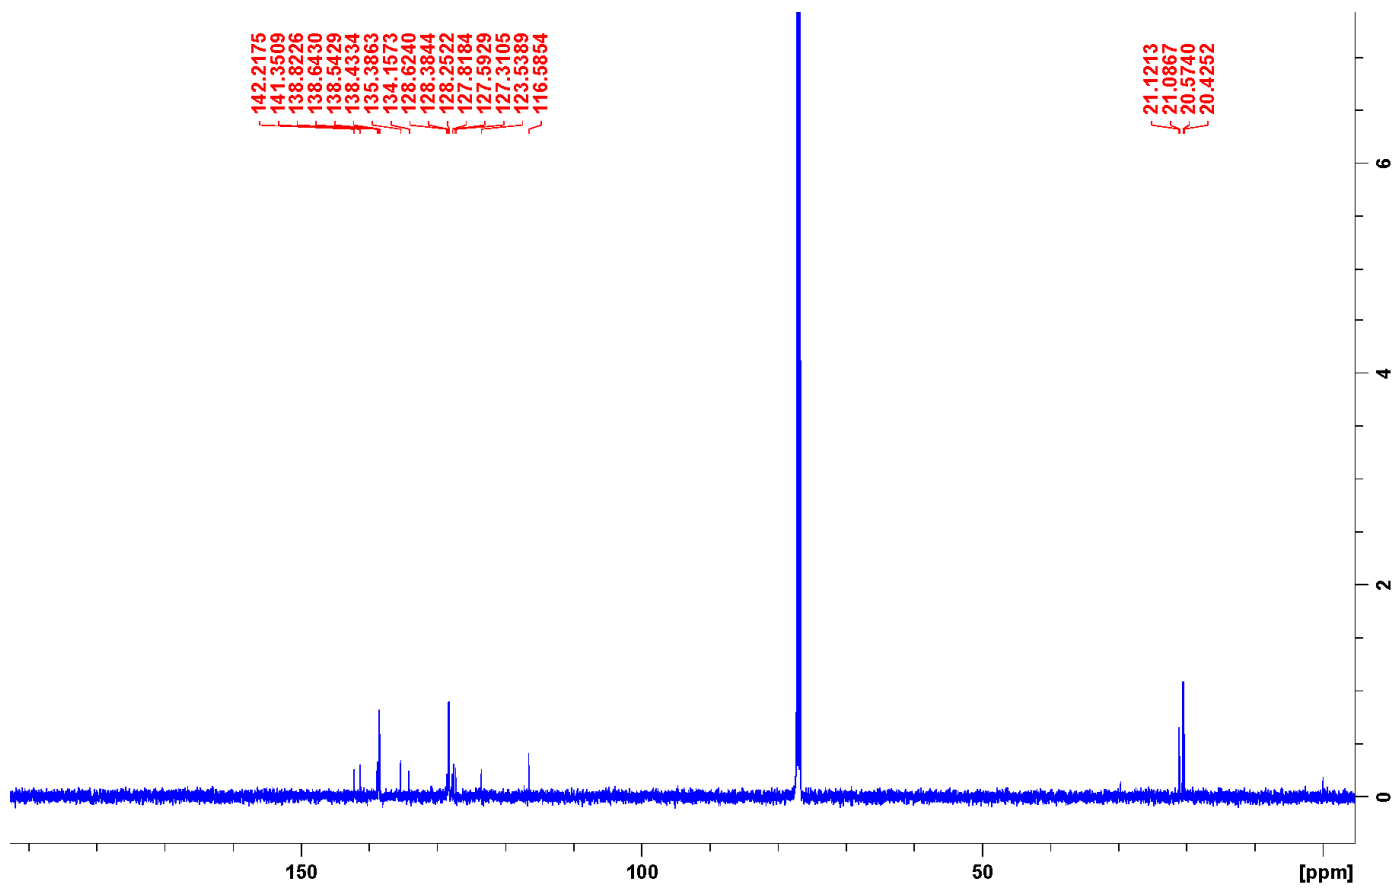



<sup>1</sup>H NMR of 18

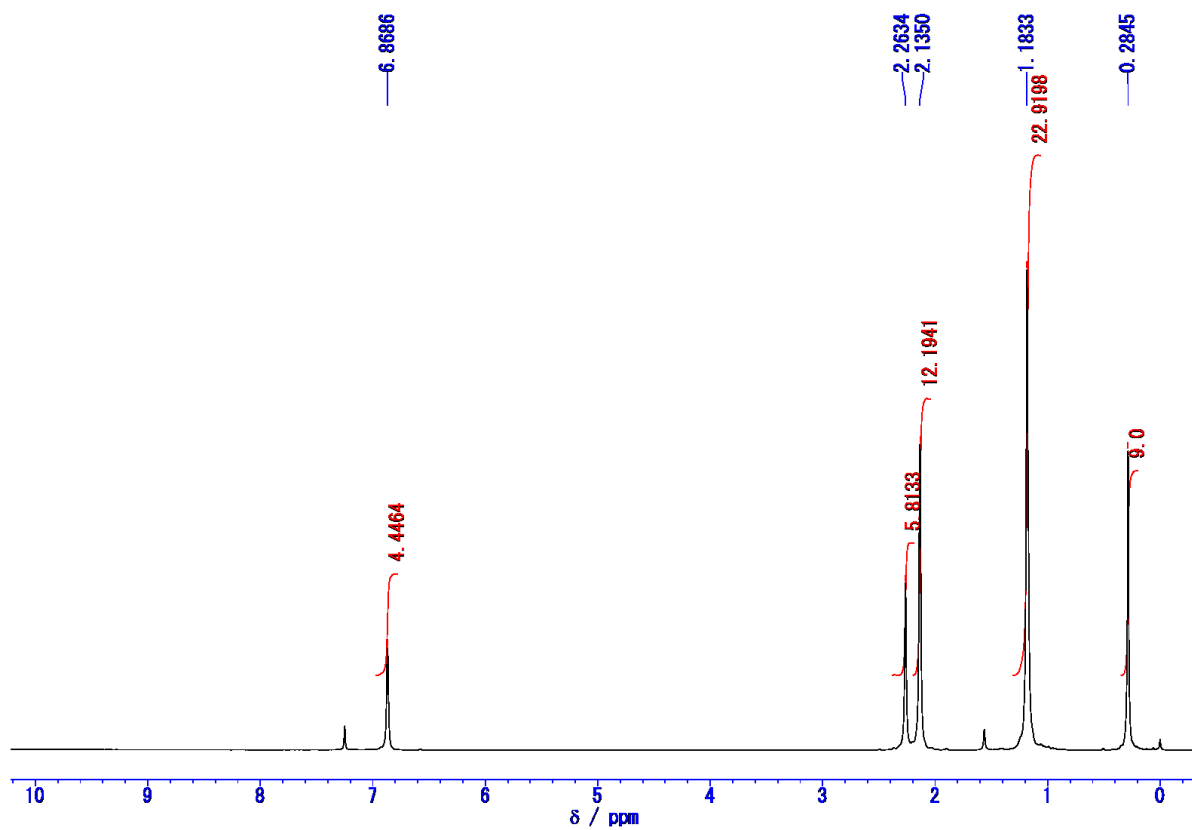

<sup>13</sup>C NMR of 18

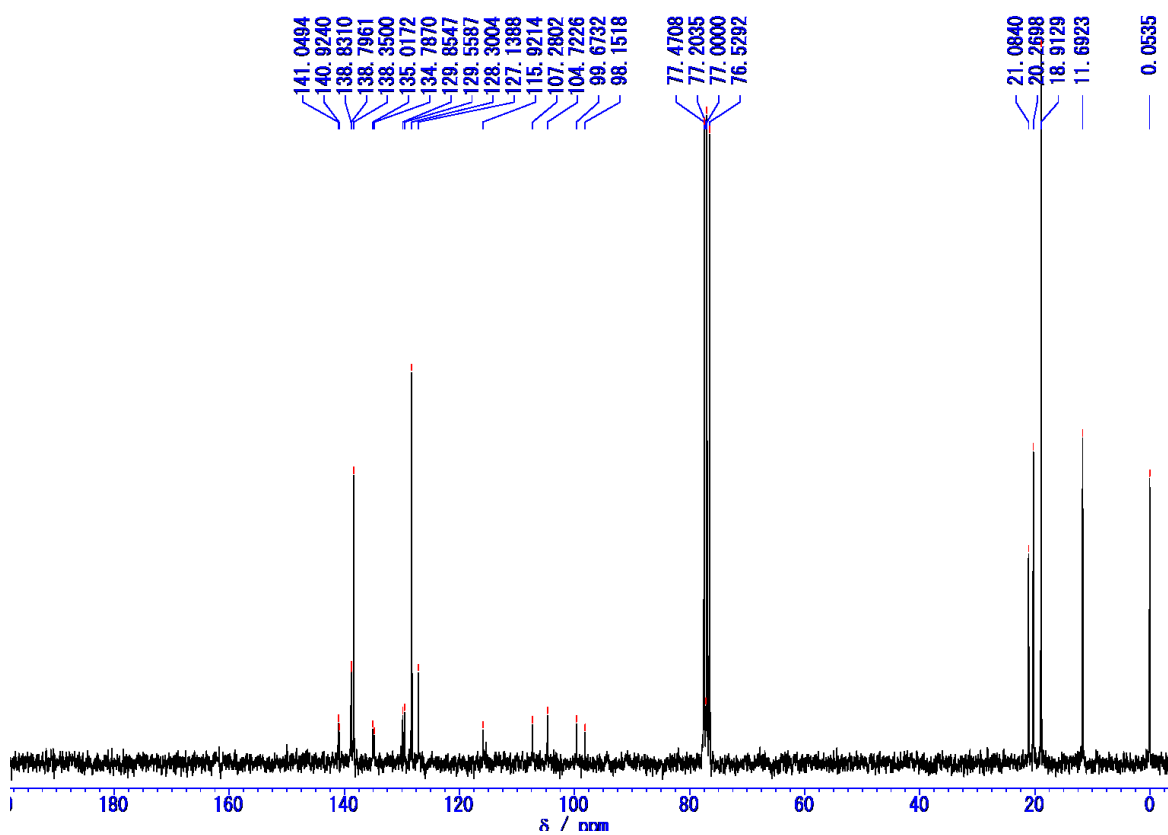

<sup>1</sup>H NMR of 19

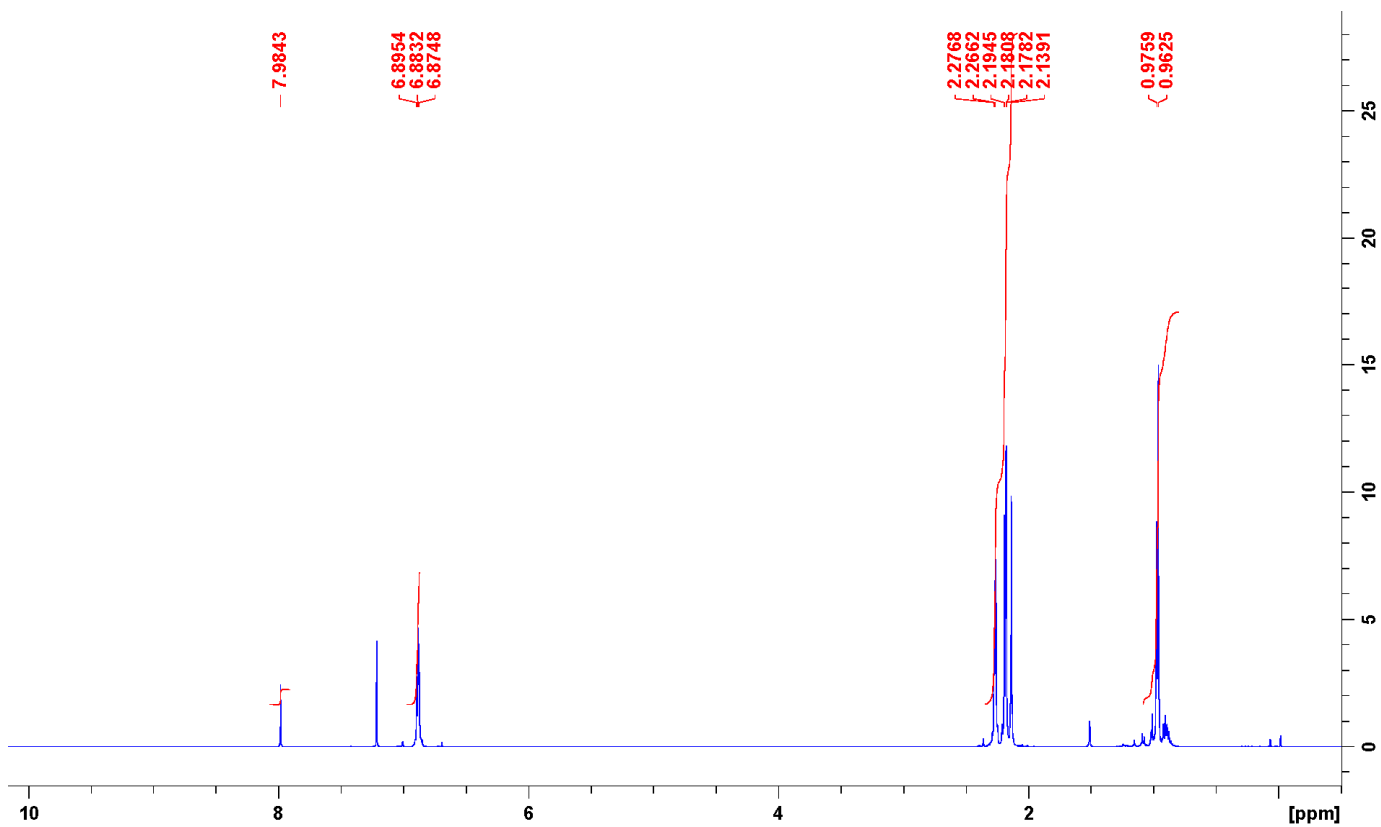

<sup>13</sup>C NMR of 19

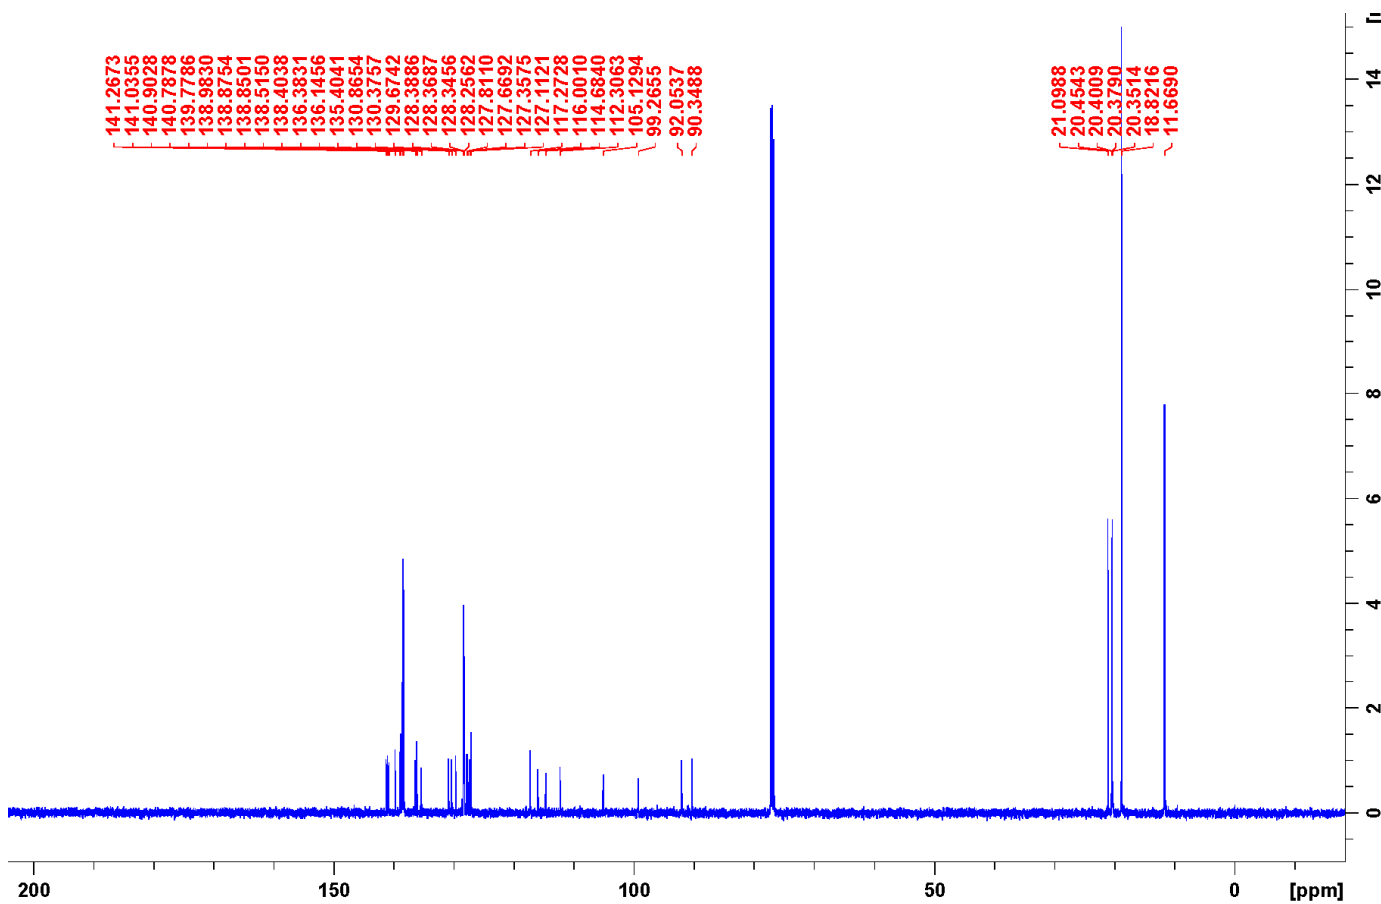

<sup>1</sup>H NMR of 20

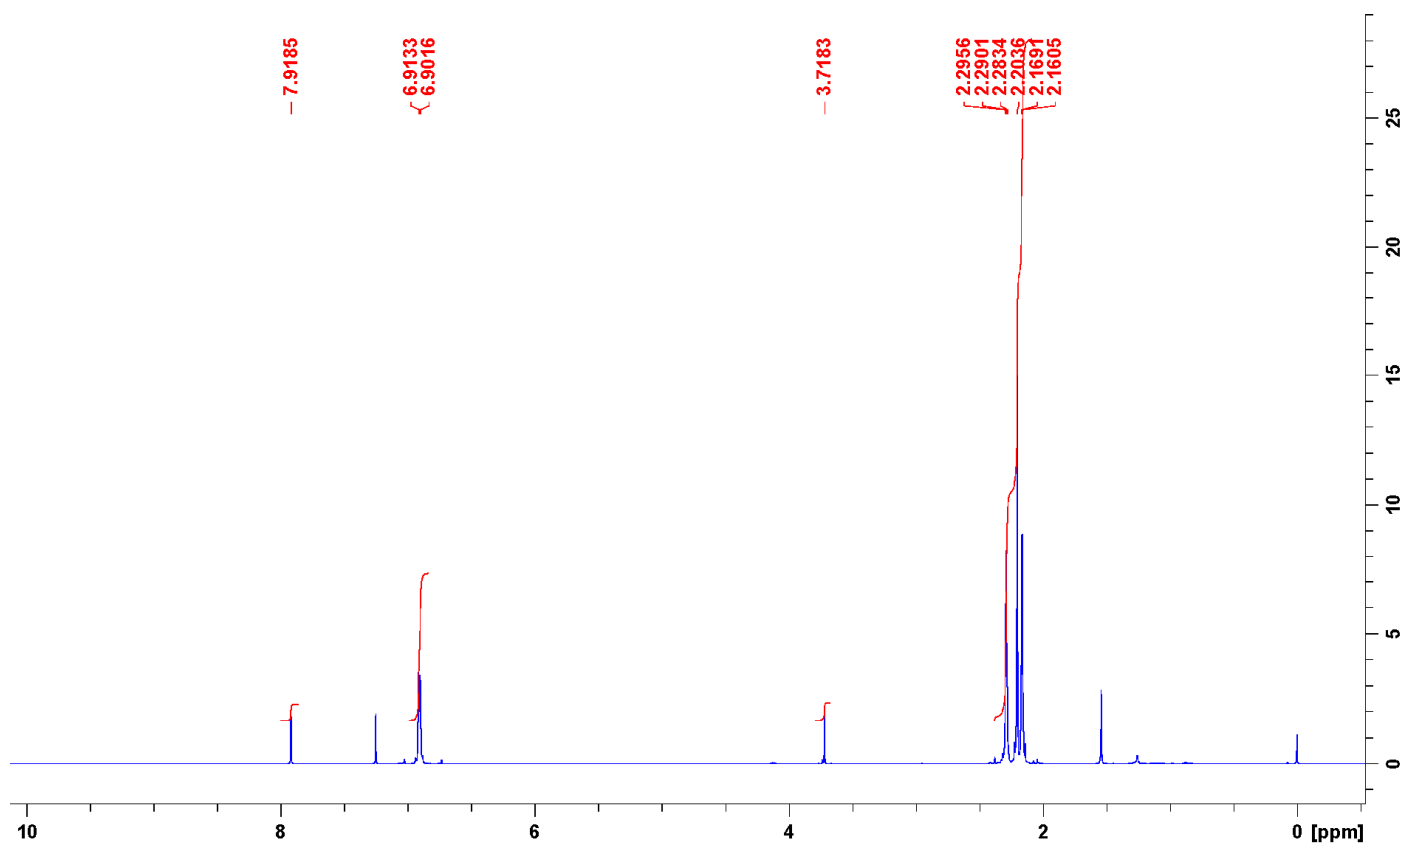

<sup>13</sup>C NMR of 20

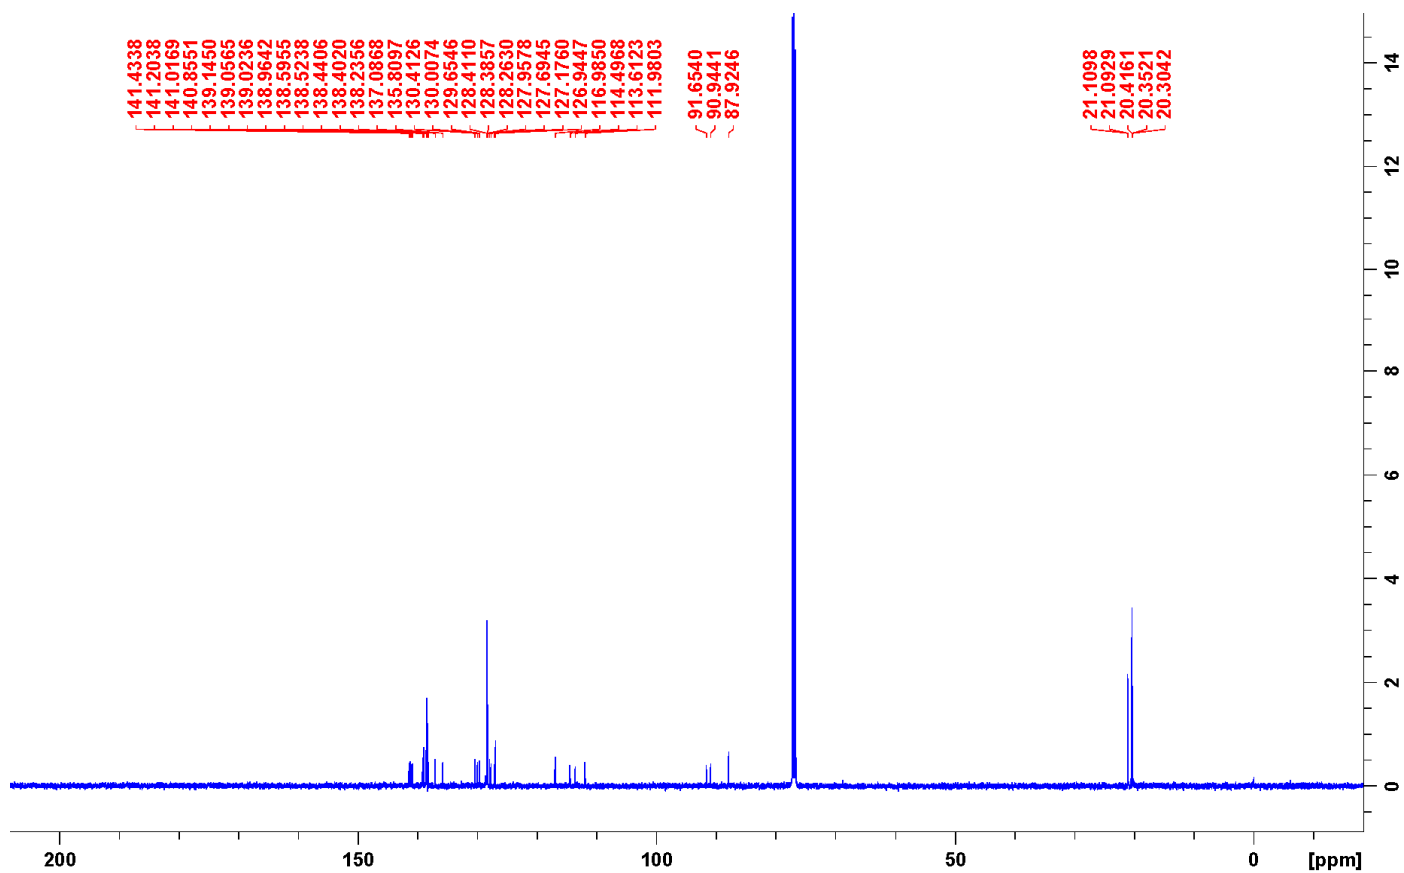

<sup>1</sup>H NMR of 21

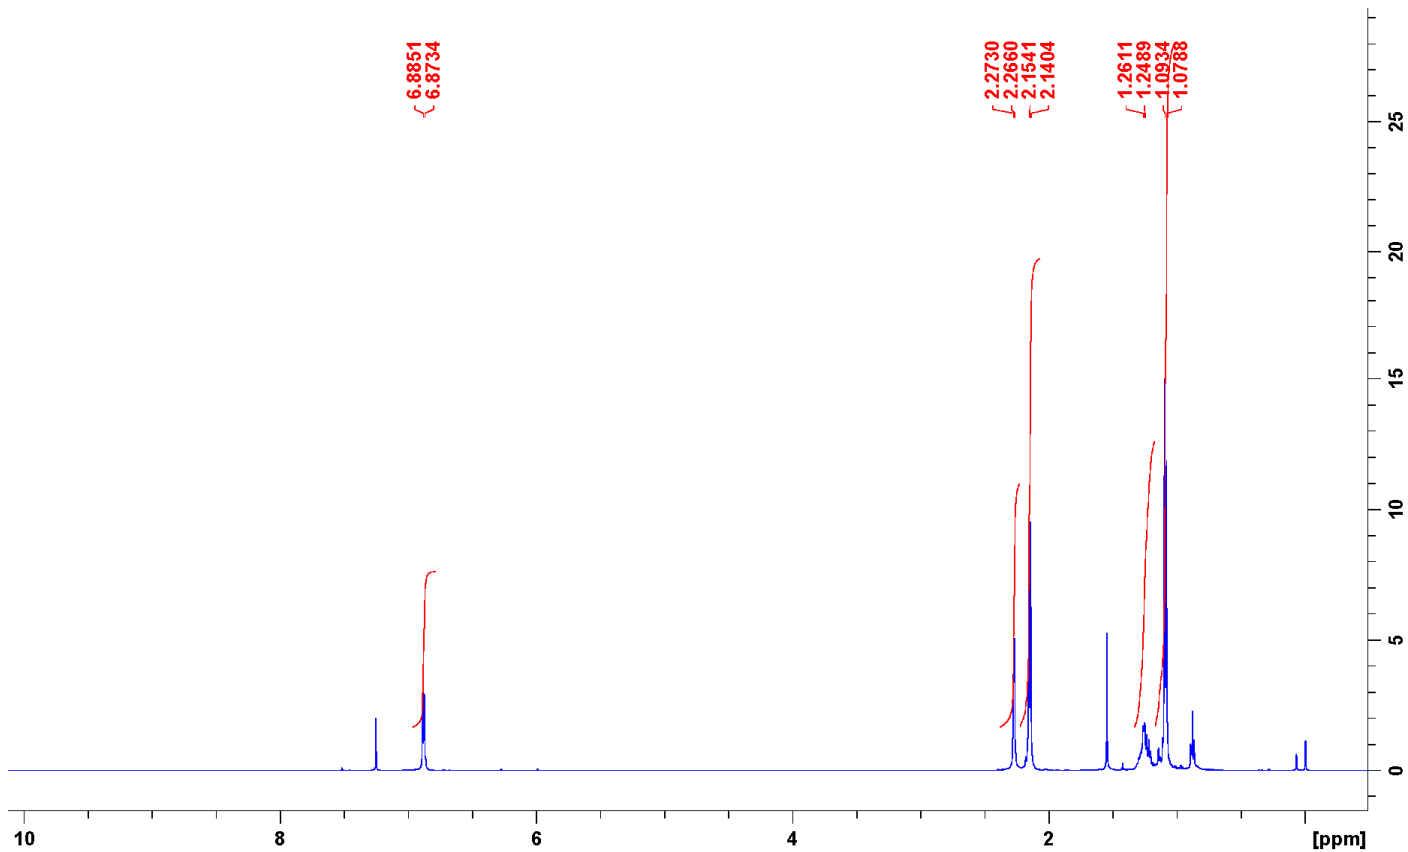

<sup>13</sup>C NMR of 21

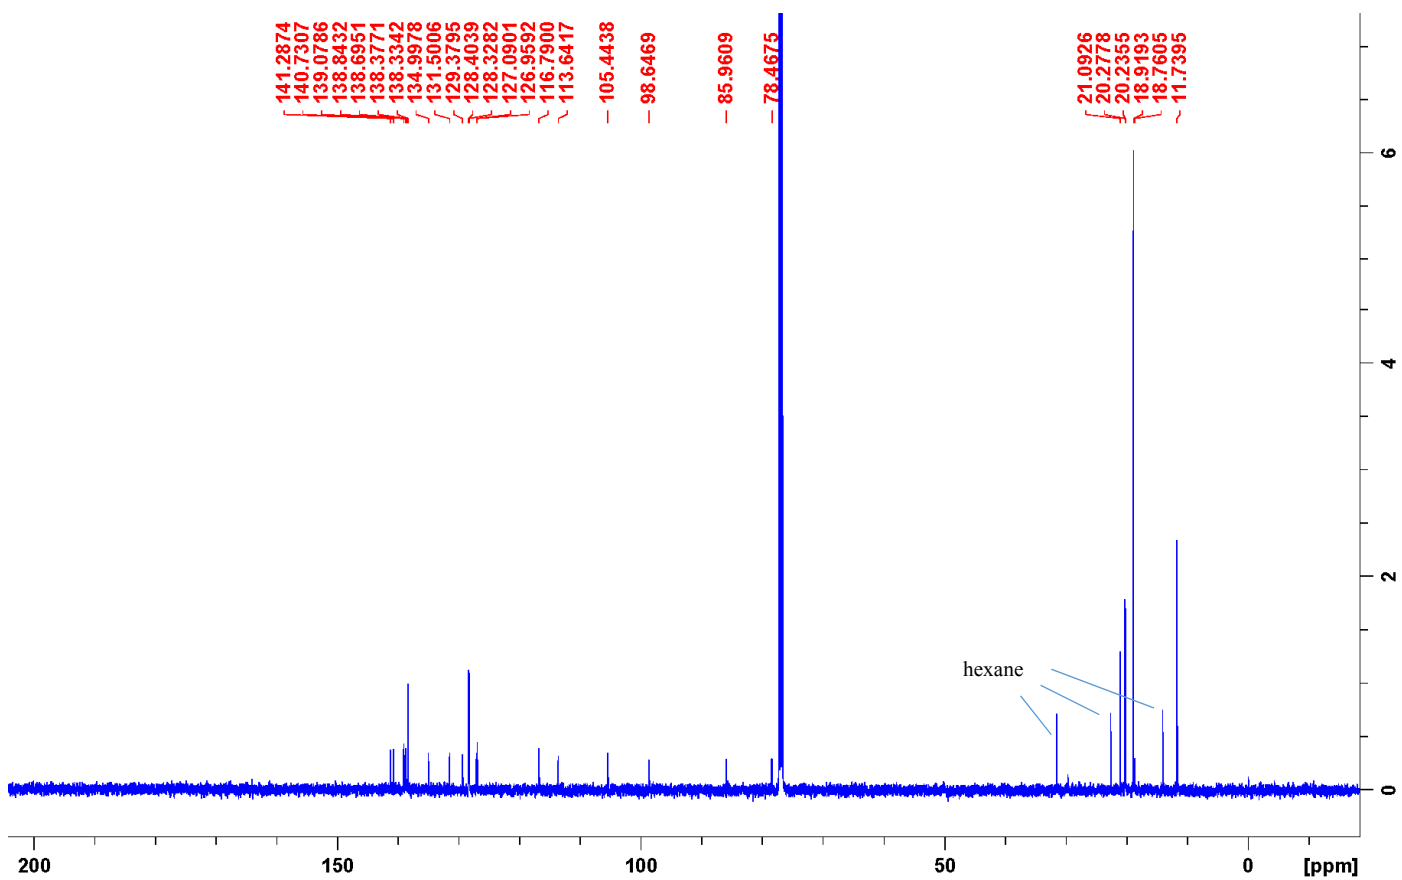

**Table S3.** Cartesian coordinate of optimized structure of Me-**8A** ( $C_s$ ) at the B3LYP/6-31G(d,p) level

|   |             |             |             |
|---|-------------|-------------|-------------|
| C | 1.33556743  | 0.77777324  | 0.00000000  |
| H | 2.13183921  | 1.52075720  | 0.00000000  |
| C | 1.79865884  | -0.48526228 | 0.00000000  |
| H | 2.88637962  | -0.54166990 | 0.00000000  |
| C | 1.20366100  | -1.83353876 | 0.00000000  |
| H | 1.97050477  | -2.60609033 | 0.00000000  |
| C | -0.05497101 | -2.30819037 | 0.00000000  |
| H | -0.11805497 | -3.39524613 | 0.00000000  |
| C | -1.38902411 | -1.68818554 | 0.00000000  |
| H | -2.17786549 | -2.43832874 | 0.00000000  |
| C | -1.84455115 | -0.42085807 | 0.00000000  |
| H | -2.93177481 | -0.35614768 | 0.00000000  |
| C | -1.24912197 | 0.92733871  | 0.00000000  |
| H | -2.02942787 | 1.68635335  | 0.00000000  |
| C | 0.00000000  | 1.43699953  | 0.00000000  |
| C | 0.14450220  | 2.94548863  | 0.00000000  |
| H | 0.71058685  | 3.28281785  | 0.87865620  |
| H | 0.71058685  | 3.28281785  | -0.87865620 |
| H | -0.82110166 | 3.45534593  | 0.00000000  |

**Table S4.** Cartesian coordinate of optimized structure of type (i) reference compound for Me-**8A** ( $C_s$ ) at the B3LYP/6-31G(d,p) level

|   |             |             |             |
|---|-------------|-------------|-------------|
| C | -1.31898310 | 0.91992506  | 0.00000000  |
| H | -2.08647636 | 1.69250111  | 0.00000000  |
| C | -1.84958029 | -0.33378067 | 0.00000000  |
| H | -2.93875110 | -0.31296647 | 0.00000000  |
| C | -1.36130804 | -1.68840855 | 0.00000000  |
| H | -2.17738363 | -2.40916541 | 0.00000000  |
| C | -0.12970356 | -2.26292930 | 0.00000000  |
| H | -0.15632496 | -3.35146847 | 0.00000000  |
| C | 1.22282417  | -1.75816223 | 0.00000000  |
| H | 1.95108705  | -2.56831776 | 0.00000000  |
| C | 1.79895687  | -0.53702553 | 0.00000000  |
| H | 2.88924651  | -0.58145013 | 0.00000000  |
| C | 0.00000000  | 1.52969968  | 0.00000000  |
| C | 0.01836220  | 2.88323206  | 0.00000000  |
| H | 0.94925327  | 3.44286686  | 0.00000000  |
| C | 1.39221967  | 0.90222228  | 0.00000000  |
| H | 1.91453785  | 1.34598631  | 0.86161831  |
| H | 1.91453785  | 1.34598631  | -0.86161831 |
| H | -0.89645395 | 3.46739076  | 0.00000000  |

**Table S5.** Cartesian coordinate of optimized structure of **8A** ( $D_{4h}$ ) at the B3LYP/6-31G(d,p) level

|   |             |             |             |
|---|-------------|-------------|-------------|
| C | 0.67253864  | 1.71585976  | -0.00000000 |
| H | 1.11155741  | 2.71215649  | 0.00000000  |
| C | -0.67253864 | 1.71585976  | -0.00000000 |
| H | -1.11155741 | 2.71215649  | -0.00000000 |
| C | -1.71585976 | 0.67253864  | 0.00000000  |
| H | -2.71215649 | 1.11155741  | 0.00000000  |
| C | -1.71585976 | -0.67253864 | -0.00000000 |
| H | -2.71215649 | -1.11155741 | -0.00000000 |
| C | -0.67253864 | -1.71585976 | -0.00000000 |
| H | -1.11155741 | -2.71215649 | 0.00000000  |
| C | 0.67253864  | -1.71585976 | -0.00000000 |
| H | 1.11155741  | -2.71215649 | -0.00000000 |
| C | 1.71585976  | -0.67253864 | 0.00000000  |
| H | 2.71215649  | -1.11155741 | 0.00000000  |
| C | 1.71585976  | 0.67253864  | -0.00000000 |
| H | 2.71215649  | 1.11155741  | -0.00000000 |

**Table S6.** Cartesian coordinate of optimized structure of type (ii) reference compound for **8A** ( $C_{2h}$ ) at the B3LYP/6-31G(d,p) level

|   |             |             |            |
|---|-------------|-------------|------------|
| C | 0.30368100  | 1.87237100  | 0.00000000 |
| H | -0.38299600 | 2.71729700  | 0.00000000 |
| C | -0.30368100 | 0.65361200  | 0.00000000 |
| H | -1.38706700 | 0.68353000  | 0.00000000 |
| C | 0.30368100  | -0.65361200 | 0.00000000 |
| H | 1.38706700  | -0.68353000 | 0.00000000 |
| C | -0.30368100 | -1.87237100 | 0.00000000 |
| H | 0.38299600  | -2.71729700 | 0.00000000 |
| C | -1.70361400 | -2.29248900 | 0.00000000 |
| H | -1.81486400 | -3.37661200 | 0.00000000 |
| C | 1.70361400  | 2.29248900  | 0.00000000 |
| H | 1.81486400  | 3.37661200  | 0.00000000 |
| C | -2.84761000 | -1.58605500 | 0.00000000 |
| H | -3.80240000 | -2.10248000 | 0.00000000 |
| H | -2.89556100 | -0.50455000 | 0.00000000 |
| C | 2.84761000  | 1.58605500  | 0.00000000 |
| H | 3.80240000  | 2.10248000  | 0.00000000 |
| H | 2.89556100  | 0.50455000  | 0.00000000 |

**Table S7.** Cartesian coordinate of optimized structure of Me-12A ( $C_s$ ) at the B3LYP/6-31G(d,p) level

|   |             |             |             |
|---|-------------|-------------|-------------|
| C | 2.24737807  | 1.53987301  | 0.00000000  |
| C | -1.76513281 | -2.14899962 | -0.00000000 |
| C | -0.45710761 | -2.94014064 | -0.00000000 |
| C | 0.93498577  | 2.32650928  | 0.00000000  |
| C | -0.24327625 | 1.65525916  | -0.00000000 |
| C | 0.72472592  | -2.27307569 | 0.00000000  |
| C | -1.71972612 | -0.79231463 | 0.00000000  |
| C | 2.20669906  | 0.18389483  | 0.00000000  |
| C | -1.71705821 | 1.69728913  | 0.00000000  |
| C | 2.18889120  | -2.29158132 | 0.00000000  |
| C | -2.41731339 | 0.49396693  | -0.00000000 |
| C | 2.90693233  | -1.10294024 | 0.00000000  |
| H | 0.47804830  | -1.24553521 | 0.00000000  |
| H | -0.00000000 | 0.62813605  | 0.00000000  |
| H | 1.18254925  | -0.07662187 | 0.00000000  |
| H | -0.69445070 | -0.53726384 | 0.00000000  |
| H | -0.55013767 | -4.02419528 | 0.00000000  |
| H | 1.02538416  | 3.41080022  | 0.00000000  |
| H | 3.16225127  | 2.12851424  | 0.00000000  |
| H | -2.68232334 | -2.73384857 | -0.00000000 |
| H | 2.74487306  | -3.22608633 | 0.00000000  |
| H | 3.99271667  | -1.15855299 | 0.00000000  |
| H | -3.50421009 | 0.54453569  | 0.00000000  |
| C | -2.44013161 | 3.01576201  | 0.00000000  |
| H | -2.16407987 | 3.61075422  | 0.87955768  |
| H | -2.16407987 | 3.61075422  | -0.87955768 |
| H | -3.52573928 | 2.88759629  | 0.00000000  |

**Table S8.** Cartesian coordinate of optimized structure of type (i) reference compound for Me-12A ( $C_s$ ) at the B3LYP/6-31G(d,p) level

|   |             |             |             |
|---|-------------|-------------|-------------|
| C | 2.30939893  | 1.49168377  | -0.00000000 |
| C | -1.81973959 | -2.07637740 | 0.00000000  |
| C | -0.55159693 | -2.90143858 | 0.00000000  |
| C | 1.05368984  | 2.31313861  | -0.00000000 |
| C | -0.17117166 | 1.70922125  | -0.00000000 |
| C | 0.65466521  | -2.26673277 | 0.00000000  |
| C | -1.75611449 | -0.72371983 | 0.00000000  |
| C | 2.21589926  | 0.12846695  | -0.00000000 |
| C | -1.62336651 | 1.89199664  | -0.00000000 |
| C | 2.09707411  | -2.33565257 | 0.00000000  |
| C | 2.86284698  | -1.16080916 | 0.00000000  |
| H | 0.43088165  | -1.23247287 | 0.00000000  |
| H | 0.00000000  | 0.66647547  | -0.00000000 |
| H | 1.18019984  | -0.08651032 | -0.00000000 |
| H | -0.73231327 | -0.45931716 | 0.00000000  |
| H | -0.67436044 | -3.98254266 | 0.00000000  |
| H | 1.18570447  | 3.39355485  | -0.00000000 |
| H | 3.25013887  | 2.03816807  | -0.00000000 |

|   |             |             |             |
|---|-------------|-------------|-------------|
| H | -2.75379498 | -2.63567841 | 0.00000000  |
| H | 2.62418086  | -3.28693818 | 0.00000000  |
| H | 3.94594660  | -1.25844228 | 0.00000000  |
| C | -2.53129042 | 0.57726736  | -0.00000000 |
| H | -3.19294364 | 0.64180755  | -0.87378103 |
| H | -3.19294364 | 0.64180755  | 0.87378103  |
| C | -2.24835680 | 3.08342156  | -0.00000000 |
| H | -3.33188920 | 3.16229016  | -0.00000000 |
| H | -1.69043460 | 4.01500319  | -0.00000000 |

**Table S9.** Cartesian coordinate of optimized structure of **12A** ( $D_{2d}$ ) at the B3LYP/6-31G(d,p) level

|   |             |             |             |
|---|-------------|-------------|-------------|
| C | 0.00000000  | 2.61776520  | 0.76498806  |
| C | -0.00000000 | -2.61776520 | -0.76498806 |
| C | -0.00000000 | -2.61776520 | 0.76498806  |
| C | 0.00000000  | 2.61776520  | -0.76498806 |
| C | 0.00000000  | 1.43490611  | -1.42892011 |
| C | -0.00000000 | -1.43490611 | 1.42892011  |
| C | -0.00000000 | -1.43490611 | -1.42892011 |
| C | -0.00000000 | 1.43490611  | 1.42892011  |
| C | 0.00000000  | 0.69399005  | -2.69321621 |
| C | -0.00000000 | -0.69399005 | 2.69321621  |
| C | 0.00000000  | -0.69399005 | -2.69321621 |
| C | -0.00000000 | 0.69399005  | 2.69321621  |
| H | -0.00000000 | -0.68317105 | 0.68615705  |
| H | 0.00000000  | 0.68317105  | -0.68615705 |
| H | 0.00000000  | 0.68317105  | 0.68615705  |
| H | -0.00000000 | -0.68317105 | -0.68615705 |
| H | -0.00000000 | -3.59307527 | 1.24671010  |
| H | 0.00000000  | 3.59307527  | -1.24671010 |
| H | 0.00000000  | 3.59307527  | 1.24671010  |
| H | -0.00000000 | -3.59307527 | -1.24671010 |
| H | -0.00000000 | -1.20744709 | 3.65149228  |
| H | 0.00000000  | 1.20744709  | -3.65149228 |
| H | -0.00000000 | 1.20744709  | 3.65149228  |
| H | 0.00000000  | -1.20744709 | -3.65149228 |

**Table S10.** Cartesian coordinate of optimized structure of type (ii) reference compound for **12A** ( $C_s$ ) at the B3LYP/6-31G(d,p)

level

|   |             |             |            |
|---|-------------|-------------|------------|
| C | -0.01160900 | -0.71731300 | 0.00000000 |
| C | 0.01160900  | 0.71731300  | 0.00000000 |
| C | 1.14557500  | 1.46941900  | 0.00000000 |
| C | -3.62312600 | -3.33879900 | 0.00000000 |
| C | 3.62312600  | 3.33879900  | 0.00000000 |
| C | -1.14557500 | -1.46941900 | 0.00000000 |
| C | 1.14557500  | 2.90820900  | 0.00000000 |
| C | -2.22868100 | -3.73165900 | 0.00000000 |
| C | 2.22868100  | 3.73165900  | 0.00000000 |
| C | -1.14557500 | -2.90820900 | 0.00000000 |
| H | -3.85100000 | -2.27490200 | 0.00000000 |
| H | 2.10295100  | 0.95175400  | 0.00000000 |
| H | -2.10295100 | -0.95175400 | 0.00000000 |
| H | 3.85100000  | 2.27490200  | 0.00000000 |
| H | -0.95212200 | 1.22770200  | 0.00000000 |
| H | 0.95212200  | -1.22770200 | 0.00000000 |
| H | -2.04463700 | -4.80482100 | 0.00000000 |
| H | 0.16269600  | 3.37766800  | 0.00000000 |
| H | -0.16269600 | -3.37766800 | 0.00000000 |
| H | 2.04463700  | 4.80482100  | 0.00000000 |
| C | -4.64385000 | -4.21313600 | 0.00000000 |
| H | -5.67756600 | -3.88423500 | 0.00000000 |
| H | -4.47094100 | -5.28634500 | 0.00000000 |
| C | 4.64385000  | 4.21313600  | 0.00000000 |
| H | 5.67756600  | 3.88423500  | 0.00000000 |
| H | 4.47094100  | 5.28634500  | 0.00000000 |

**Table S11.** Cartesian coordinate of optimized structure of Me-**16A** ( $C_s$ ) at the B3LYP/6-31G(d,p) level

|   |             |             |             |
|---|-------------|-------------|-------------|
| C | 3.54945632  | -1.25980328 | 0.00000000  |
| C | -3.49262792 | 0.56650521  | 0.00000000  |
| C | -2.02468411 | 2.72662393  | 0.00000000  |
| C | 2.08516395  | -3.42576259 | 0.00000000  |
| C | 3.48371796  | 0.22564731  | 0.00000000  |
| C | -3.43563581 | -0.91923661 | 0.00000000  |
| C | -0.72090080 | 3.18955498  | 0.00000000  |
| C | 0.77534946  | -3.86207050 | 0.00000000  |
| C | 2.28787910  | 0.86709350  | 0.00000000  |
| C | -2.24293045 | -1.56705880 | 0.00000000  |
| C | 0.36889428  | 2.22575258  | 0.00000000  |
| C | -0.32339875 | -2.92212896 | 0.00000000  |
| C | 2.42301637  | -2.01887010 | 0.00000000  |
| C | -2.36213964 | 1.32025540  | 0.00000000  |
| C | 1.73604599  | 2.21626489  | 0.00000000  |
| C | -1.69143254 | -2.91521374 | 0.00000000  |
| H | 2.36038432  | 3.10621348  | 0.00000000  |
| H | -2.31191593 | -3.80805185 | 0.00000000  |
| H | -0.00000000 | 1.21442744  | 0.00000000  |
| H | 0.03916818  | -1.90712335 | 0.00000000  |
| H | 1.45004744  | 0.18264149  | 0.00000000  |
| H | -1.40399531 | -0.88415093 | 0.00000000  |
| H | 0.57881184  | -4.93132695 | 0.00000000  |
| H | -2.82634204 | 3.46362091  | 0.00000000  |
| H | 2.88029173  | -4.16840128 | 0.00000000  |
| H | -4.48149219 | 1.02125901  | 0.00000000  |
| H | 4.54093990  | -1.70890488 | 0.00000000  |
| H | -4.38358753 | -1.45207813 | 0.00000000  |
| H | 4.42845301  | 0.76411328  | 0.00000000  |
| H | 1.53608663  | -1.41503773 | 0.00000000  |
| H | -1.47885792 | 0.71119685  | 0.00000000  |
| C | -0.41101705 | 4.66299672  | 0.00000000  |
| H | 0.18248005  | 4.94023324  | 0.88019654  |
| H | 0.18248005  | 4.94023324  | -0.88019654 |
| H | -1.32149052 | 5.26783659  | 0.00000000  |

**Table S12.** Cartesian coordinate of optimized structure of type (i) reference compound for Me-16A (C<sub>s</sub>) at the B3LYP/6-31G(d,p) level

|   |             |             |             |
|---|-------------|-------------|-------------|
| C | -3.56068578 | -1.30356159 | 0.00000000  |
| C | 3.47556764  | 0.61585376  | 0.00000000  |
| C | -2.06962950 | -3.45127424 | 0.00000000  |
| C | -3.48800944 | 0.16485848  | 0.00000000  |
| C | 3.41548129  | -0.86687092 | 0.00000000  |
| C | 0.59486838  | 3.30033269  | 0.00000000  |
| C | -0.74065867 | -3.86126466 | 0.00000000  |
| C | -2.29035546 | 0.81922342  | 0.00000000  |
| C | 2.22326159  | -1.51868708 | 0.00000000  |
| C | -0.42315842 | 2.25698825  | 0.00000000  |
| C | 0.32874065  | -2.90770424 | 0.00000000  |
| C | -2.42597761 | -2.06378090 | 0.00000000  |
| C | 2.36557438  | 1.38510645  | 0.00000000  |
| C | -1.79149361 | 2.17390653  | 0.00000000  |
| C | 1.70168882  | -2.86809587 | 0.00000000  |
| H | -2.45473157 | 3.03618078  | 0.00000000  |
| H | 2.34125261  | -3.74763893 | 0.00000000  |
| H | 0.00000000  | 1.26741228  | 0.00000000  |
| H | -0.04962903 | -1.89835162 | 0.00000000  |
| H | -1.43769535 | 0.15255515  | 0.00000000  |
| H | 1.38023084  | -0.83852885 | 0.00000000  |
| H | -0.52480698 | -4.92703447 | 0.00000000  |
| H | -2.84690123 | -4.21248694 | 0.00000000  |
| H | 4.47067609  | 1.05890241  | 0.00000000  |
| H | -4.55157853 | -1.75343233 | 0.00000000  |
| H | 4.36274129  | -1.40144682 | 0.00000000  |
| H | -4.42915802 | 0.71021640  | 0.00000000  |
| H | -1.54817176 | -1.44771720 | 0.00000000  |
| H | 1.46452808  | 0.80221992  | 0.00000000  |
| C | 2.09935239  | 2.87137132  | 0.00000000  |
| H | 2.57384849  | 3.34110765  | 0.87249249  |
| H | 2.57384849  | 3.34110765  | -0.87249249 |



|   |             |            |            |
|---|-------------|------------|------------|
| C | 0.30414596  | 4.61554740 | 0.00000000 |
| H | -0.72068035 | 4.97318873 | 0.00000000 |
| H | 1.08395124  | 5.37205334 | 0.00000000 |

**Table S13.** Cartesian coordinate of optimized structure of **16A** ( $D_{2d}$ ) at the B3LYP/6-31G(d,p) level

|   |             |             |             |
|---|-------------|-------------|-------------|
| C | 1.98006074  | 3.05596351  | 0.00000000  |
| C | -1.98006074 | -3.05596351 | -0.00000000 |
| C | -3.56715207 | -0.97960367 | -0.00000000 |
| C | 3.56715207  | 0.97960367  | 0.00000000  |
| C | 0.55239316  | 3.47116948  | 0.00000000  |
| C | -0.55239316 | -3.47116948 | -0.00000000 |
| C | -3.56715207 | 0.40069511  | -0.00000000 |
| C | 3.56715207  | -0.40069511 | 0.00000000  |
| C | -0.43686119 | 2.54188655  | 0.00000000  |
| C | 0.43686119  | -2.54188655 | -0.00000000 |
| C | -2.32735322 | 1.14572573  | 0.00000000  |
| C | 2.32735322  | -1.14572573 | 0.00000000  |
| C | 2.33970341  | 1.74602520  | 0.00000000  |
| C | -2.33970341 | -1.74602520 | -0.00000000 |
| C | -1.89026206 | 2.44199456  | 0.00000000  |
| C | 1.89026206  | -2.44199456 | -0.00000000 |
| H | -2.54257386 | 3.31172936  | 0.00000000  |
| H | 2.54257386  | -3.31172936 | -0.00000000 |
| H | -1.47893588 | 0.48061636  | 0.00000000  |
| H | 1.47893588  | -0.48061636 | 0.00000000  |
| H | -0.05143832 | 1.53134318  | 0.00000000  |
| H | 0.05143832  | -1.53134318 | -0.00000000 |
| H | -4.51908475 | 0.92565887  | 0.00000000  |
| H | 4.51908475  | -0.92565887 | 0.00000000  |
| H | -4.52325571 | -1.49893636 | 0.00000000  |
| H | 4.52325571  | 1.49893636  | 0.00000000  |
| H | -2.72360178 | -3.85090288 | -0.00000000 |
| H | 2.72360178  | 3.85090288  | 0.00000000  |
| H | -0.34542120 | -4.53856935 | -0.00000000 |
| H | 0.34542120  | 4.53856935  | 0.00000000  |
| H | 1.48585144  | 1.09599785  | 0.00000000  |
| H | -1.48585144 | -1.09599785 | -0.00000000 |

**Table S14.** Cartesian coordinate of optimized structure of type (ii) reference compound for **16A** ( $C_s$ ) at the B3LYP/6-31G(d,p)

level

|   |             |             |            |
|---|-------------|-------------|------------|
| C | 1.06490300  | -0.51781700 | 0.00000000 |
| C | -1.70909800 | 6.39920900  | 0.00000000 |
| C | 1.96993300  | -2.81189500 | 0.00000000 |
| C | 0.00000000  | 0.43886100  | 0.00000000 |
| C | -1.79712500 | 5.04080400  | 0.00000000 |
| C | 1.87899400  | -4.17444500 | 0.00000000 |
| C | 0.17828400  | 1.79058400  | 0.00000000 |
| C | -0.53363700 | -7.12698600 | 0.00000000 |
| C | -0.71153800 | 4.09826700  | 0.00000000 |
| C | 0.67730900  | -4.96398500 | 0.00000000 |
| C | 0.88827000  | -1.86978800 | 0.00000000 |
| C | -0.49848200 | 7.19423300  | 0.00000000 |
| C | -0.88743100 | 2.74755300  | 0.00000000 |
| C | 0.66730000  | -6.32163700 | 0.00000000 |
| H | -1.90497100 | 2.35525100  | 0.00000000 |
| H | 1.61815800  | -6.85520700 | 0.00000000 |
| H | 0.30722200  | 4.48107800  | 0.00000000 |
| H | -0.28019900 | -4.44564700 | 0.00000000 |
| H | 1.19618400  | 2.18140800  | 0.00000000 |
| H | -1.47988300 | -6.58585500 | 0.00000000 |
| H | -2.79601600 | 4.60637200  | 0.00000000 |
| H | 2.81205500  | -4.73577800 | 0.00000000 |
| H | -2.64035600 | 6.96339500  | 0.00000000 |
| H | 2.97013700  | -2.38092700 | 0.00000000 |
| H | 2.08271200  | -0.12632200 | 0.00000000 |
| H | -1.01805200 | 0.04829800  | 0.00000000 |
| H | -0.13127400 | -2.25098300 | 0.00000000 |
| H | 0.45416400  | 6.66838400  | 0.00000000 |

|   |             |             |            |
|---|-------------|-------------|------------|
| C | -0.48847200 | 8.53836700  | 0.00000000 |
| H | 0.43812800  | 9.10240600  | 0.00000000 |
| H | -1.41164900 | 9.11233700  | 0.00000000 |
| C | -0.55021300 | -8.47106800 | 0.00000000 |
| H | -1.47996100 | -9.02970900 | 0.00000000 |
| H | 0.36961800  | -9.05004300 | 0.00000000 |

**Table S15.** Cartesian coordinate of optimized structure of Me-20A ( $C_s$ ) at the B3LYP/6-31G(d,p) level

|   |             |             |             |
|---|-------------|-------------|-------------|
| C | 2.26784800  | -4.15374400 | 0.00000000  |
| C | 0.98462600  | -4.65572700 | 0.00000000  |
| C | -2.18236400 | 3.49217000  | 0.00000000  |
| C | -0.91084800 | 4.03131600  | 0.00000000  |
| C | 4.27511800  | 0.53890800  | 0.00000000  |
| C | -3.67176700 | -2.56439800 | 0.00000000  |
| C | -4.20092600 | -1.19326400 | 0.00000000  |
| C | 3.73817200  | 1.90745500  | 0.00000000  |
| C | -0.17617800 | -3.80596700 | 0.00000000  |
| C | 2.54362500  | -2.74157700 | 0.00000000  |
| C | 0.24633100  | 3.15998000  | 0.00000000  |
| C | -2.45088200 | 2.07921400  | 0.00000000  |
| C | 2.40447300  | 2.16728500  | 0.00000000  |
| C | -3.39021200 | -0.10181800 | 0.00000000  |
| C | -2.33824100 | -2.82834300 | 0.00000000  |
| C | 3.47065000  | -0.55654600 | 0.00000000  |
| C | -1.52569100 | -4.02235500 | 0.00000000  |
| C | 3.68206300  | -1.98562100 | 0.00000000  |
| C | 1.59621900  | 3.36622500  | 0.00000000  |
| C | -3.59283900 | 1.32803900  | 0.00000000  |
| H | -3.02762800 | 4.17829600  | 0.00000000  |
| H | 3.10129300  | -4.85271500 | 0.00000000  |
| H | 0.84715300  | -5.73479400 | 0.00000000  |
| H | 0.00000000  | 2.10688800  | 0.00000000  |
| H | -1.56261600 | 1.45994200  | 0.00000000  |
| H | 0.06105900  | -2.74937200 | 0.00000000  |
| H | 1.65268200  | -2.12605100 | 0.00000000  |
| H | 1.76540700  | 1.28941800  | 0.00000000  |
| H | -2.32721500 | -0.32317400 | 0.00000000  |
| H | -1.70044900 | -1.94984700 | 0.00000000  |
| H | 2.40650500  | -0.34073000 | 0.00000000  |
| H | 2.05030500  | 4.35476100  | 0.00000000  |
| H | -4.58987400 | 1.76406300  | 0.00000000  |
| H | -1.96839500 | -5.01645800 | 0.00000000  |
| H | 4.68160400  | -2.41582500 | 0.00000000  |
| H | 4.45992000  | 2.72176900  | 0.00000000  |
| H | -5.28299600 | -1.07986400 | 0.00000000  |
| H | -4.39729300 | -3.37529300 | 0.00000000  |
| H | 5.35784900  | 0.43181900  | 0.00000000  |
| C | -0.70389700 | 5.52386000  | 0.00000000  |
| H | -0.13206700 | 5.84215300  | 0.88037200  |
| H | -0.13206700 | 5.84215300  | -0.88037200 |
| H | -1.65484500 | 6.06230600  | 0.00000000  |

**Table S16.** Cartesian coordinate of optimized structure of type (i) reference compound for Me-20A ( $C_s$ ) at the B3LYP/6-31G(d,p) level

|   |             |             |            |
|---|-------------|-------------|------------|
| C | -4.71255185 | -0.62750528 | 0.00000000 |
| C | -4.35269697 | -1.96572797 | 0.00000000 |
| C | 3.86162882  | 1.79074219  | 0.00000000 |
| C | -2.10637245 | 3.75233658  | 0.00000000 |
| C | 0.10281758  | -4.43988232 | 0.00000000 |
| C | 1.51011125  | -4.03844477 | 0.00000000 |
| C | -0.69407644 | 4.11563725  | 0.00000000 |
| C | -2.98817087 | -2.38969987 | 0.00000000 |
| C | -3.74455436 | 0.42303623  | 0.00000000 |
| C | 2.44197457  | 2.12300113  | 0.00000000 |
| C | 3.18145095  | -0.72648346 | 0.00000000 |
| C | 0.31238589  | 3.19488912  | 0.00000000 |
| C | 1.90681104  | -2.73814385 | 0.00000000 |

|   |             |             |             |
|---|-------------|-------------|-------------|
| C | -0.91217068 | -3.53099266 | 0.00000000  |
| C | -2.52377867 | 2.45313698  | 0.00000000  |
| C | -2.34708416 | -3.60251461 | 0.00000000  |
| C | -3.79890731 | 1.79452848  | 0.00000000  |
| C | 1.74623413  | 3.29920661  | 0.00000000  |
| C | 3.19687471  | -2.08124236 | 0.00000000  |
| H | -5.77037103 | -0.37395403 | 0.00000000  |
| H | -5.14114172 | -2.71520263 | 0.00000000  |
| H | 1.77991062  | 1.26908491  | 0.00000000  |
| H | 2.17635119  | -0.32658386 | 0.00000000  |
| H | -2.28022331 | -1.57040996 | 0.00000000  |
| H | -2.72105540 | 0.06987686  | 0.00000000  |
| H | 0.00000000  | 2.15432920  | 0.00000000  |
| H | 1.10768280  | -2.00200622 | 0.00000000  |
| H | -0.59016555 | -2.49401132 | 0.00000000  |
| H | -1.72231316 | 1.72043178  | 0.00000000  |
| H | 2.23032381  | 4.27412052  | 0.00000000  |
| H | 4.11797325  | -2.66254708 | 0.00000000  |
| H | -2.87489420 | -4.55416026 | 0.00000000  |
| H | -4.73316003 | 2.35245660  | 0.00000000  |
| H | -0.45633093 | 5.17770010  | 0.00000000  |
| H | 2.25130682  | -4.83531416 | 0.00000000  |
| H | -0.10982989 | -5.50697501 | 0.00000000  |
| H | -2.82975685 | 4.56499285  | 0.00000000  |
| C | 4.83416726  | 2.72338198  | 0.00000000  |
| H | 5.88502591  | 2.44913800  | 0.00000000  |
| C | 4.28599100  | 0.29621810  | 0.00000000  |
| H | 4.93492724  | 0.13534449  | 0.87195124  |
| H | 4.93492724  | 0.13534449  | -0.87195124 |
| H | 4.61031257  | 3.78547961  | 0.00000000  |

**Table S17.** Cartesian coordinate of optimized structure of **20A** ( $D_{2h}$ ) at the B3LYP/6-31G(d,p) level

|   |             |             |             |
|---|-------------|-------------|-------------|
| C | 0.68875050  | 4.36960602  | 0.00000000  |
| C | -0.68875050 | 4.36960602  | -0.00000000 |
| C | -0.68875050 | -4.36960602 | -0.00000000 |
| C | 0.68875050  | -4.36960602 | 0.00000000  |
| C | 4.27272820  | 0.73505529  | 0.00000000  |
| C | -4.27272820 | 0.73505529  | -0.00000000 |
| C | -4.27272820 | -0.73505529 | -0.00000000 |
| C | 4.27272820  | -0.73505529 | 0.00000000  |
| C | -1.46136648 | 3.15538094  | 0.00000000  |
| C | 1.46136648  | 3.15538094  | 0.00000000  |
| C | 1.46136648  | -3.15538094 | 0.00000000  |
| C | -1.46136648 | -3.15538094 | 0.00000000  |
| C | 3.12390511  | -1.46160415 | -0.00000000 |
| C | -3.12390511 | -1.46160415 | -0.00000000 |
| C | -3.12390511 | 1.46160415  | -0.00000000 |
| C | 3.12390511  | 1.46160415  | -0.00000000 |
| C | -2.79750918 | 2.86894558  | 0.00000000  |
| C | 2.79750918  | 2.86894558  | 0.00000000  |
| C | 2.79750918  | -2.86894558 | 0.00000000  |
| C | -2.79750918 | -2.86894558 | 0.00000000  |
| H | -1.20990237 | -5.32438992 | 0.00000000  |
| H | 1.20990237  | -5.32438992 | 0.00000000  |
| H | 1.20990237  | 5.32438992  | 0.00000000  |
| H | -1.20990237 | 5.32438992  | -0.00000000 |
| H | 0.85700960  | -2.25677741 | 0.00000000  |
| H | -0.85700960 | -2.25677741 | -0.00000000 |
| H | -0.85700960 | 2.25677741  | -0.00000000 |
| H | 0.85700960  | 2.25677741  | -0.00000000 |
| H | 2.21177646  | -0.87291239 | 0.00000000  |
| H | -2.21177646 | -0.87291239 | -0.00000000 |
| H | -2.21177646 | 0.87291239  | -0.00000000 |
| H | 2.21177646  | 0.87291239  | -0.00000000 |
| H | 3.56975833  | -3.63559034 | -0.00000000 |
| H | -3.56975833 | -3.63559034 | -0.00000000 |
| H | -3.56975833 | 3.63559034  | -0.00000000 |
| H | 3.56975833  | 3.63559034  | -0.00000000 |
| H | 5.24160189  | -1.23009261 | 0.00000000  |
| H | -5.24160189 | -1.23009261 | -0.00000000 |
| H | -5.24160189 | 1.23009261  | -0.00000000 |

H 5. 24160189 1. 23009261 -0. 00000000

**Table S18.** Cartesian coordinate of optimized structure of type (ii) reference compound for **20A**(C<sub>s</sub>) at the B3LYP/6-31G(d,p)

level

|   |              |              |             |
|---|--------------|--------------|-------------|
| C | 2. 22728500  | 5. 12330200  | 0. 00000000 |
| C | 3. 30100600  | 5. 96791700  | 0. 00000000 |
| C | -3. 30100600 | -5. 96791700 | 0. 00000000 |
| C | -2. 22728500 | -5. 12330200 | 0. 00000000 |
| C | 0. 00051500  | 0. 71464900  | 0. 00000000 |
| C | -0. 00051500 | -0. 71464900 | 0. 00000000 |
| C | 4. 69159600  | 5. 60391400  | 0. 00000000 |
| C | 2. 25051100  | 3. 68994200  | 0. 00000000 |
| C | -2. 25051100 | -3. 68994200 | 0. 00000000 |
| C | -4. 69159600 | -5. 60391400 | 0. 00000000 |
| C | -1. 12661100 | -1. 48639200 | 0. 00000000 |
| C | -7. 10917000 | -6. 15244800 | 0. 00000000 |
| C | 7. 10917000  | 6. 15244800  | 0. 00000000 |
| C | 1. 12661100  | 1. 48639200  | 0. 00000000 |
| C | 5. 70711000  | 6. 50544800  | 0. 00000000 |
| C | 1. 12661100  | 2. 91631500  | 0. 00000000 |
| C | -1. 12661100 | -2. 91631500 | 0. 00000000 |
| C | -5. 70711000 | -6. 50544800 | 0. 00000000 |
| H | -3. 09341200 | -7. 03681700 | 0. 00000000 |
| H | -1. 23800500 | -5. 57876600 | 0. 00000000 |
| H | 1. 23800500  | 5. 57876600  | 0. 00000000 |
| H | 3. 09341200  | 7. 03681700  | 0. 00000000 |
| H | -3. 21586200 | -3. 18697100 | 0. 00000000 |
| H | -4. 94792000 | -4. 54577100 | 0. 00000000 |
| H | 4. 94792000  | 4. 54577100  | 0. 00000000 |
| H | 3. 21586200  | 3. 18697100  | 0. 00000000 |
| H | -2. 09718200 | -0. 98951500 | 0. 00000000 |
| H | -7. 34085300 | -5. 08730100 | 0. 00000000 |
| H | 7. 34085300  | 5. 08730100  | 0. 00000000 |
| H | 2. 09718200  | 0. 98951500  | 0. 00000000 |
| H | -0. 15518900 | -3. 41188200 | 0. 00000000 |
| H | -5. 46690600 | -7. 56898600 | 0. 00000000 |
| H | 5. 46690600  | 7. 56898600  | 0. 00000000 |
| H | 0. 15518900  | 3. 41188200  | 0. 00000000 |
| H | 0. 97002000  | -1. 21162500 | 0. 00000000 |
| H | -0. 97002000 | 1. 21162500  | 0. 00000000 |
| C | 8. 11860100  | 7. 04024100  | 0. 00000000 |
| H | 9. 15613400  | 6. 72394700  | 0. 00000000 |
| H | 7. 93241200  | 8. 11102500  | 0. 00000000 |
| C | -8. 11860100 | -7. 04024100 | 0. 00000000 |
| H | -9. 15613400 | -6. 72394700 | 0. 00000000 |
| H | -7. 93241200 | -8. 11102500 | 0. 00000000 |

**Table S19.** Cartesian coordinate of optimized structure of Me-**24A** (C<sub>s</sub>) at the B3LYP/6-31G(d,p) level

|   |              |              |             |
|---|--------------|--------------|-------------|
| C | -4. 09545300 | 0. 12346400  | 0. 00000000 |
| C | -4. 69314500 | 1. 42733200  | 0. 00000000 |
| C | -4. 03491000 | 2. 63460800  | 0. 00000000 |
| C | -2. 59212000 | 2. 71193300  | 0. 00000000 |
| C | -1. 80645100 | 3. 82653800  | 0. 00000000 |
| C | -0. 37478200 | 3. 71698900  | 0. 00000000 |
| C | 0. 52871300  | 4. 73579100  | 0. 00000000 |
| C | 1. 97011500  | 4. 58271400  | 0. 00000000 |
| C | 2. 64282300  | 3. 39808200  | 0. 00000000 |
| C | 4. 06893200  | 3. 24020000  | 0. 00000000 |
| C | 4. 73421000  | 2. 04174000  | 0. 00000000 |
| C | 4. 10578700  | 0. 75296100  | 0. 00000000 |
| C | 4. 71581900  | -0. 46758100 | 0. 00000000 |
| C | 3. 93766700  | -1. 67141300 | 0. 00000000 |
| C | 4. 38582800  | -2. 95786800 | 0. 00000000 |
| C | 3. 53880400  | -4. 13426400 | 0. 00000000 |
| C | 2. 17632000  | -4. 12264400 | 0. 00000000 |
| C | 1. 31474200  | -5. 26913100 | 0. 00000000 |
| C | -0. 05567100 | -5. 22443200 | 0. 00000000 |
| C | -0. 83929000 | -4. 02326900 | 0. 00000000 |

|   |             |             |             |
|---|-------------|-------------|-------------|
| C | -2.19979500 | -3.92120100 | 0.00000000  |
| C | -2.83970800 | -2.63807600 | 0.00000000  |
| C | -4.17674900 | -2.37768500 | 0.00000000  |
| C | -4.77507400 | -1.05804100 | 0.00000000  |
| H | -5.78242800 | 1.45256000  | 0.00000000  |
| H | -3.01118900 | 0.07650500  | 0.00000000  |
| H | -5.86371900 | -1.02321300 | 0.00000000  |
| H | -4.86609000 | -3.22054800 | 0.00000000  |
| H | -2.15187500 | -1.79342200 | 0.00000000  |
| H | -2.81926900 | -4.81770800 | 0.00000000  |
| H | -0.29573200 | -3.08123100 | 0.00000000  |
| H | -0.59840200 | -6.16792900 | 0.00000000  |
| H | 1.79457600  | -6.24640400 | 0.00000000  |
| H | 1.68625100  | -3.15413900 | 0.00000000  |
| H | 4.04731800  | -5.09740800 | 0.00000000  |
| H | 5.46043600  | -3.13261400 | 0.00000000  |
| H | 2.86138700  | -1.50507100 | 0.00000000  |
| H | 5.80293600  | -0.54093500 | 0.00000000  |
| H | 3.01818400  | 0.73689000  | 0.00000000  |
| H | 2.05370200  | 2.48616400  | 0.00000000  |
| H | -2.05733400 | 1.76609500  | 0.00000000  |
| H | 0.00000000  | 2.69427100  | 0.00000000  |
| H | -2.24638800 | 4.82189900  | 0.00000000  |
| H | 0.15222800  | 5.75752900  | 0.00000000  |
| H | 2.55210600  | 5.50345400  | 0.00000000  |
| H | 5.82249200  | 2.06089400  | 0.00000000  |
| H | 4.66235900  | 4.15304600  | 0.00000000  |
| C | -4.82579400 | 3.92032800  | 0.00000000  |
| H | -4.59271400 | 4.53141200  | 0.88071300  |
| H | -4.59271400 | 4.53141200  | -0.88071300 |
| H | -5.90103200 | 3.72604400  | 0.00000000  |

**Table S20.** Cartesian coordinate of optimized structure of type (i) reference compound for Me-24A(C<sub>s</sub>) at the B3LYP/6-31G(d,p) level

|   |             |             |            |
|---|-------------|-------------|------------|
| C | 4.18037066  | 0.23430330  | 0.00000000 |
| C | 4.08672284  | 2.86753933  | 0.00000000 |
| C | 2.62583292  | 2.82623461  | 0.00000000 |
| C | 1.75265054  | 3.87113893  | 0.00000000 |
| C | 0.33320778  | 3.68068217  | 0.00000000 |
| C | -0.60204613 | 4.67507777  | 0.00000000 |
| C | -2.03428672 | 4.50286936  | 0.00000000 |
| C | -2.69702915 | 3.30853450  | 0.00000000 |
| C | -4.11634842 | 3.14551188  | 0.00000000 |
| C | -4.78227181 | 1.94190069  | 0.00000000 |
| C | -4.15473499 | 0.66126486  | 0.00000000 |
| C | -4.75985297 | -0.56681312 | 0.00000000 |
| C | -3.97210781 | -1.75587637 | 0.00000000 |
| C | -4.39827583 | -3.05433351 | 0.00000000 |
| C | -3.52891271 | -4.20589821 | 0.00000000 |
| C | -2.16327058 | -4.15590212 | 0.00000000 |
| C | -1.26624774 | -5.26649360 | 0.00000000 |
| C | 0.10485195  | -5.16865888 | 0.00000000 |
| C | 0.84668186  | -3.94538622 | 0.00000000 |
| C | 2.20503601  | -3.81108910 | 0.00000000 |
| C | 2.83220555  | -2.52202203 | 0.00000000 |
| C | 4.16859758  | -2.27415210 | 0.00000000 |
| C | 4.80260104  | -0.96255277 | 0.00000000 |
| H | 3.09584342  | 0.23994446  | 0.00000000 |
| H | 5.89292377  | -0.97420539 | 0.00000000 |
| H | 4.84501490  | -3.12778365 | 0.00000000 |
| H | 2.14525326  | -1.67594397 | 0.00000000 |
| H | 2.84032516  | -4.69676969 | 0.00000000 |
| H | 0.27808458  | -3.01810721 | 0.00000000 |
| H | 0.68105443  | -6.09230654 | 0.00000000 |
| H | -1.70732271 | -6.26187922 | 0.00000000 |
| H | -1.70407098 | -3.17258774 | 0.00000000 |
| H | -4.01084615 | -5.18247477 | 0.00000000 |
| H | -5.46948455 | -3.24882135 | 0.00000000 |
| H | -2.89850962 | -1.57485154 | 0.00000000 |
| H | -5.84650577 | -0.64636718 | 0.00000000 |

|   |             |            |             |
|---|-------------|------------|-------------|
| H | -3.06698449 | 0.64740257 | 0.00000000  |
| H | -2.09825463 | 2.40243782 | 0.00000000  |
| H | 2.16724137  | 1.84296483 | 0.00000000  |
| H | 0.00000000  | 2.64364395 | 0.00000000  |
| H | 2.11570095  | 4.89765388 | 0.00000000  |
| H | -0.24419628 | 5.70375185 | 0.00000000  |
| H | -2.62841041 | 5.41575110 | 0.00000000  |
| H | -5.87061080 | 1.96214828 | 0.00000000  |
| H | -4.71304952 | 4.05621341 | 0.00000000  |
| C | 4.90048925  | 1.56113591 | 0.00000000  |
| H | 5.56968543  | 1.59468435 | 0.87057273  |
| H | 5.56968543  | 1.59468435 | -0.87057273 |
| C | 4.78357833  | 4.02192254 | 0.00000000  |
| H | 5.86950858  | 4.02277480 | 0.00000000  |
| H | 4.30327587  | 4.99441564 | 0.00000000  |

**Table S21.** Cartesian coordinate of optimized structure of **24A**( $D_{4h}$ ) at the B3LYP/6-31G(d,p) level

|   |             |             |            |
|---|-------------|-------------|------------|
| C | 4.31792936  | 0.57978500  | 0.00000000 |
| C | 4.80001421  | 1.93085747  | 0.00000000 |
| C | 4.01127352  | 3.05198210  | 0.00000000 |
| C | 2.57722147  | 3.04784118  | 0.00000000 |
| C | 1.74414369  | 4.12834873  | 0.00000000 |
| C | 0.32099538  | 3.95336484  | 0.00000000 |
| C | -0.63920646 | 4.91944900  | 0.00000000 |
| C | -2.06825894 | 4.67605742  | 0.00000000 |
| C | -2.66091508 | 3.44927256  | 0.00000000 |
| C | -4.07189750 | 3.19101713  | 0.00000000 |
| C | -4.64844531 | 1.94739230  | 0.00000000 |
| C | -3.92783678 | 0.70751236  | 0.00000000 |
| C | -4.44761601 | -0.55398100 | 0.00000000 |
| C | -3.58496716 | -1.69922585 | 0.00000000 |
| C | -3.94145537 | -3.01379947 | 0.00000000 |
| C | -3.01575622 | -4.12932563 | 0.00000000 |
| C | -1.65701423 | -4.02872965 | 0.00000000 |
| C | -0.72782307 | -5.12156053 | 0.00000000 |
| C | 0.63740660  | -4.99911331 | 0.00000000 |
| C | 1.35103434  | -3.75516435 | 0.00000000 |
| C | 2.70332312  | -3.57437261 | 0.00000000 |
| C | 3.26351956  | -2.25450500 | 0.00000000 |
| C | 4.58030506  | -1.90622340 | 0.00000000 |
| C | 5.08392767  | -0.54693976 | 0.00000000 |
| H | 5.88025765  | 2.06673345  | 0.00000000 |
| H | 3.23993350  | 0.45197276  | 0.00000000 |
| H | 6.16713019  | -0.43331732 | 0.00000000 |
| H | 5.32605000  | -2.69943897 | 0.00000000 |
| H | 2.52290746  | -1.45587504 | 0.00000000 |
| H | 3.37458168  | -4.43259389 | 0.00000000 |
| H | 0.75389161  | -2.84605609 | 0.00000000 |
| H | 1.23269598  | -5.91033825 | 0.00000000 |
| H | -1.15021912 | -6.12506510 | 0.00000000 |
| H | -1.22938583 | -3.03100819 | 0.00000000 |
| H | -3.45839496 | -5.12445302 | 0.00000000 |
| H | -5.00119671 | -3.26338437 | 0.00000000 |
| H | -2.52309223 | -1.45694350 | 0.00000000 |
| H | -5.52654896 | -0.70574511 | 0.00000000 |
| H | -2.84190603 | 0.77050317  | 0.00000000 |
| H | -2.01086715 | 2.57989573  | 0.00000000 |
| H | 2.08901536  | 2.07584632  | 0.00000000 |
| H | 0.00000000  | 2.91252157  | 0.00000000 |
| H | 4.50272011  | 4.02314424  | 0.00000000 |
| H | 2.15155055  | 5.13888632  | 0.00000000 |
| H | -0.32517837 | 5.96190097  | 0.00000000 |
| H | -2.70832823 | 5.55730062  | 0.00000000 |
| H | -5.73521244 | 1.88734870  | 0.00000000 |
| H | -4.72981522 | 4.05852791  | 0.00000000 |

**Table S22.** Cartesian coordinate of optimized structure of type (ii) reference compound for **24A**( $C_s$ ) at the B3LYP/6-31G(d,p) level

|   |              |             |            |
|---|--------------|-------------|------------|
| C | -11.64382400 | -0.12751600 | 0.00000000 |
| C | -10.82434400 | -1.32147900 | 0.00000000 |
| C | -9.46411800  | -1.38160800 | 0.00000000 |
| C | -8.54437900  | -0.27731500 | 0.00000000 |
| C | -7.18968700  | -0.42497600 | 0.00000000 |
| C | -6.25639800  | 0.66025600  | 0.00000000 |
| C | -4.89996100  | 0.51175700  | 0.00000000 |
| C | -3.96879900  | 1.59665500  | 0.00000000 |
| C | -2.61108000  | 1.45150300  | 0.00000000 |
| C | -1.69680100  | 2.55216300  | 0.00000000 |
| C | -0.32821200  | 2.49408500  | 0.00000000 |
| C | 0.48919000   | 1.32001800  | 0.00000000 |
| C | 1.85471300   | 1.34924000  | 0.00000000 |
| C | 2.69004000   | 0.19001500  | 0.00000000 |
| C | 4.05513800   | 0.22183100  | 0.00000000 |
| C | 4.89041500   | -0.93839100 | 0.00000000 |
| C | 6.25467700   | -0.91027800 | 0.00000000 |
| C | 7.07175100   | -2.08802500 | 0.00000000 |
| C | 8.43659600   | -2.14832400 | 0.00000000 |
| C | 9.35459600   | -1.04228800 | 0.00000000 |
| C | 10.70518700  | -1.18378500 | 0.00000000 |
| C | 11.63910500  | -0.08003900 | 0.00000000 |
| H | -11.36917600 | -2.26417500 | 0.00000000 |
| H | -11.13737300 | 0.83560100  | 0.00000000 |
| H | 11.20670900  | 0.92059700  | 0.00000000 |
| H | 11.12929900  | -2.18823900 | 0.00000000 |
| H | 8.94666600   | -0.03290100 | 0.00000000 |
| H | 8.89091400   | -3.13791300 | 0.00000000 |
| H | 6.53363000   | -3.03489100 | 0.00000000 |
| H | 6.74550100   | 0.06142900  | 0.00000000 |
| H | 4.39122600   | -1.90796400 | 0.00000000 |
| H | 4.55247500   | 1.19216800  | 0.00000000 |
| H | 2.19302900   | -0.78052400 | 0.00000000 |
| H | 2.35286400   | 2.31931100  | 0.00000000 |
| H | 0.00000000   | 0.34737500  | 0.00000000 |
| H | -2.20680500  | 0.44075800  | 0.00000000 |
| H | -8.94796300  | 0.73340500  | 0.00000000 |
| H | -6.66889400  | 1.66956000  | 0.00000000 |
| H | -9.00945500  | -2.37145300 | 0.00000000 |
| H | -6.77615700  | -1.43407800 | 0.00000000 |
| H | -4.48729900  | -0.49753900 | 0.00000000 |
| H | -4.38293500  | 2.60544100  | 0.00000000 |
| H | 0.20711600   | 3.44245400  | 0.00000000 |
| H | -2.15001500  | 3.54241200  | 0.00000000 |
| C | 12.97675100  | -0.21350500 | 0.00000000 |
| H | 13.63571700  | 0.64805300  | 0.00000000 |
| H | 13.44918400  | -1.19228800 | 0.00000000 |
| C | -12.98796600 | -0.14464500 | 0.00000000 |
| H | -13.57050600 | 0.77044000  | 0.00000000 |
| H | -13.54330200 | -1.07914200 | 0.00000000 |

**Table S23.** Cartesian coordinate of optimized structure of Me-2D12A ( $C_s$ ) at the B3LYP/6-31G(d,p) level

|   |             |             |            |
|---|-------------|-------------|------------|
| C | 1.15723066  | 0.93958697  | 0.00000000 |
| C | -0.00000000 | 1.31392245  | 0.00000000 |
| C | 0.23750032  | -2.06882861 | 0.00000000 |
| C | -0.91640352 | -1.68310376 | 0.00000000 |
| C | -1.29714185 | 1.90544271  | 0.00000000 |
| C | -2.49365217 | 1.26093412  | 0.00000000 |
| C | -2.91555330 | -0.13914326 | 0.00000000 |
| H | -4.00081509 | -0.22294824 | 0.00000000 |
| C | -2.29065140 | -1.34391275 | 0.00000000 |
| H | -2.95415445 | -2.20880886 | 0.00000000 |
| C | 1.54839232  | -2.60060935 | 0.00000000 |
| H | 1.58541342  | -3.69012598 | 0.00000000 |
| C | 2.75334086  | -1.97741774 | 0.00000000 |
| H | 3.60008427  | -2.66076963 | 0.00000000 |
| C | 3.17919300  | -0.57851078 | 0.00000000 |
| H | 4.26359765  | -0.48649633 | 0.00000000 |
| C | 2.53744740  | 0.61659696  | 0.00000000 |
| H | 3.18796363  | 1.49143546  | 0.00000000 |
| H | -3.34974611 | 1.93291799  | 0.00000000 |

|   |             |            |             |
|---|-------------|------------|-------------|
| C | -1.26601002 | 3.42277397 | 0.00000000  |
| H | -0.73015996 | 3.79703813 | 0.87965284  |
| H | -0.73015996 | 3.79703813 | -0.87965284 |
| H | -2.27417712 | 3.84433381 | 0.00000000  |

**Table S24.** Cartesian coordinate of optimized structure of type (i) reference compound for Me-2D12A ( $C_s$ ) at the B3LYP/6-31G(d,p) level

|   |             |             |             |
|---|-------------|-------------|-------------|
| C | -1.14450500 | 0.96123100  | 0.00000000  |
| C | 0.00000000  | 1.38449500  | 0.00000000  |
| C | -0.32709400 | -2.04084900 | 0.00000000  |
| C | 0.83043100  | -1.65636100 | 0.00000000  |
| C | 1.27434600  | 2.00270400  | 0.00000000  |
| C | 2.89823300  | -0.19937900 | 0.00000000  |
| H | 3.97800600  | -0.35221800 | 0.00000000  |
| C | 2.20691200  | -1.36098800 | 0.00000000  |
| H | 2.83307800  | -2.25458000 | 0.00000000  |
| C | -1.63074600 | -2.55678600 | 0.00000000  |
| H | -1.68483700 | -3.64568900 | 0.00000000  |
| C | -2.83149900 | -1.90764800 | 0.00000000  |
| H | -3.69212200 | -2.57357600 | 0.00000000  |
| C | -3.20743400 | -0.51453200 | 0.00000000  |
| H | -4.28726800 | -0.37890600 | 0.00000000  |
| C | -2.51816500 | 0.66460900  | 0.00000000  |
| H | -3.14383200 | 1.55802700  | 0.00000000  |
| C | 2.62598200  | 1.27959300  | 0.00000000  |
| H | 3.18164400  | 1.67532000  | 0.86348100  |
| H | 3.18164400  | 1.67532000  | -0.86348100 |
| C | 1.31702400  | 3.35396500  | 0.00000000  |
| H | 0.40986800  | 3.94657200  | 0.00000000  |
| H | 2.26290800  | 3.88940300  | 0.00000000  |

**Table S25.** Cartesian coordinate of optimized structure of 2D12A ( $D_{2h}$ ) at the B3LYP/6-31G(d,p) level

|   |             |             |             |
|---|-------------|-------------|-------------|
| C | 1.57552052  | 0.60826477  | 0.00000000  |
| C | 1.57552052  | -0.60826477 | 0.00000000  |
| C | -1.57552052 | 0.60826477  | -0.00000000 |
| C | -1.57552052 | -0.60826477 | -0.00000000 |
| C | 1.68455789  | -2.02032531 | 0.00000000  |
| H | 2.71312636  | -2.38144485 | 0.00000000  |
| C | 0.73156550  | -2.98544469 | 0.00000000  |
| H | 1.13600426  | -3.99565531 | 0.00000000  |
| C | -0.73156550 | -2.98544469 | -0.00000000 |
| H | -1.13600426 | -3.99565531 | -0.00000000 |
| C | -1.68455789 | -2.02032531 | -0.00000000 |
| H | -2.71312636 | -2.38144485 | -0.00000000 |
| C | -1.68455789 | 2.02032531  | -0.00000000 |
| H | -2.71312636 | 2.38144485  | -0.00000000 |
| C | -0.73156550 | 2.98544469  | -0.00000000 |
| H | -1.13600426 | 3.99565531  | -0.00000000 |
| C | 0.73156550  | 2.98544469  | -0.00000000 |
| H | 1.13600426  | 3.99565531  | -0.00000000 |
| C | 1.68455789  | 2.02032531  | -0.00000000 |
| H | 2.71312636  | 2.38144485  | -0.00000000 |

**Table S26.** Cartesian coordinate of optimized structure of type (ii) reference compound for 2D12A ( $C_s$ ) at the B3LYP/6-31G(d,p) level

|   |             |             |            |
|---|-------------|-------------|------------|
| C | 0.00000000  | 0.53293000  | 0.00000000 |
| C | -1.13972600 | 0.97360000  | 0.00000000 |
| C | 2.57011900  | -4.10583700 | 0.00000000 |
| C | -2.47475700 | 1.42991000  | 0.00000000 |
| H | -3.24609400 | 0.66190300  | 0.00000000 |
| C | -2.86095900 | 2.73331300  | 0.00000000 |
| H | -3.92855900 | 2.94404200  | 0.00000000 |
| C | -1.96934700 | 3.87346500  | 0.00000000 |
| H | -0.90288700 | 3.65737400  | 0.00000000 |
| C | 1.22541800  | -3.65603900 | 0.00000000 |
| H | 0.46103400  | -4.43022700 | 0.00000000 |



|   |             |             |            |
|---|-------------|-------------|------------|
| C | 0.83504200  | -2.35433100 | 0.00000000 |
| H | -0.23064800 | -2.14077600 | 0.00000000 |
| C | 1.72779900  | -1.22616900 | 0.00000000 |
| H | 2.79347800  | -1.43839800 | 0.00000000 |
| C | 1.33398400  | 0.07804200  | 0.00000000 |
| H | 2.10399200  | 0.84751600  | 0.00000000 |
| C | 3.70786300  | -4.52575600 | 0.00000000 |
| H | 4.70935700  | -4.88884900 | 0.00000000 |
| C | -2.39141400 | 5.14861800  | 0.00000000 |
| H | -3.44966600 | 5.39727800  | 0.00000000 |
| H | -1.69413800 | 5.97967000  | 0.00000000 |

**Table S27.** Cartesian coordinate of optimized structure of Me-**3D12A** ( $C_s$ ) at the B3LYP/6-31G(d,p) level

|   |             |             |             |
|---|-------------|-------------|-------------|
| C | -1.40479319 | 1.97864683  | 0.00000000  |
| C | -2.29128911 | 0.94599169  | 0.00000000  |
| H | -3.35543552 | 1.17251027  | 0.00000000  |
| C | -1.90588441 | -0.41858604 | 0.00000000  |
| C | 0.00000000  | 1.72479690  | 0.00000000  |
| C | 1.19227076  | 1.48217253  | 0.00000000  |
| C | -1.52835867 | -1.57611114 | 0.00000000  |
| C | -1.01886461 | -2.89896211 | 0.00000000  |
| H | -1.73233336 | -3.71990018 | 0.00000000  |
| C | 0.30873727  | -3.18715169 | 0.00000000  |
| H | 0.62125573  | -4.22852985 | 0.00000000  |
| C | 1.31324618  | -2.18617479 | 0.00000000  |
| C | 2.12091537  | -1.27538189 | 0.00000000  |
| C | 2.99894466  | -0.16226857 | 0.00000000  |
| H | 4.06931150  | -0.35473311 | 0.00000000  |
| C | 2.56588498  | 1.12475947  | 0.00000000  |
| H | 3.30154907  | 1.92553152  | 0.00000000  |
| C | -1.85453481 | 3.41854453  | 0.00000000  |
| H | -1.46852887 | 3.94554827  | 0.88016627  |
| H | -1.46852887 | 3.94554827  | -0.88016627 |
| H | -2.94493612 | 3.49237049  | 0.00000000  |

**Table S28.** Cartesian coordinate of optimized structure of type (i) reference compound for Me-**3D12A** ( $C_s$ ) at the B3LYP/6-31G(d,p) level

|   |             |             |             |
|---|-------------|-------------|-------------|
| C | 1.37886900  | 2.10861100  | 0.00000000  |
| C | 1.90188000  | -0.38248900 | 0.00000000  |
| C | 0.00000000  | 1.77846800  | 0.00000000  |
| C | -1.18349300 | 1.48119400  | 0.00000000  |
| C | 1.48749900  | -1.52481700 | 0.00000000  |
| C | 0.98464400  | -2.84393900 | 0.00000000  |
| H | 1.70813800  | -3.65658200 | 0.00000000  |
| C | -0.34329800 | -3.15721600 | 0.00000000  |
| H | -0.63189700 | -4.20574900 | 0.00000000  |
| C | -1.35561800 | -2.18381000 | 0.00000000  |
| C | -2.16617400 | -1.27015600 | 0.00000000  |
| C | -3.01103700 | -0.15036200 | 0.00000000  |
| H | -4.08643200 | -0.31329400 | 0.00000000  |
| C | -2.54633000 | 1.13545300  | 0.00000000  |
| H | -3.27085900 | 1.94710000  | 0.00000000  |
| C | 2.42518000  | 0.97720700  | 0.00000000  |
| H | 3.07466500  | 1.11395400  | 0.87533300  |
| H | 3.07466500  | 1.11395400  | -0.87533300 |
| C | 1.79342900  | 3.39014800  | 0.00000000  |
| H | 1.08733300  | 4.21217100  | 0.00000000  |
| H | 2.85108400  | 3.63869800  | 0.00000000  |

**Table S29.** Cartesian coordinate of optimized structure of **3D12A** ( $D_{3h}$ ) at the B3LYP/6-31G(d,p) level

|   |            |             |             |
|---|------------|-------------|-------------|
| C | 2.70420707 | 0.77731966  | 0.00000000  |
| H | 3.79129649 | 0.79909811  | 0.00000000  |
| C | 2.02528211 | 1.95325219  | 0.00000000  |
| H | 2.58768751 | 2.88381002  | 0.00000000  |
| C | 0.60846727 | 2.03031309  | 0.00000000  |
| C | 2.06253635 | -0.48820843 | -0.00000000 |

|   |             |             |             |
|---|-------------|-------------|-------------|
| C | 1.45406908  | -1.54210466 | 0.00000000  |
| C | -0.60846727 | 2.03031309  | -0.00000000 |
| C | -2.02528211 | 1.95325219  | 0.00000000  |
| H | -2.58768751 | 2.88381002  | 0.00000000  |
| C | -2.70420707 | 0.77731966  | -0.00000000 |
| H | -3.79129649 | 0.79909811  | -0.00000000 |
| C | -2.06253635 | -0.48820843 | -0.00000000 |
| C | -1.45406908 | -1.54210466 | 0.00000000  |
| C | -0.67892496 | -2.73057185 | 0.00000000  |
| H | -1.20360898 | -3.68290813 | 0.00000000  |
| C | 0.67892496  | -2.73057185 | 0.00000000  |
| H | 1.20360898  | -3.68290813 | 0.00000000  |

**Table S30.** Cartesian coordinate of optimized structure of type (ii) reference compound for **3D12A** ( $C_s$ ) at the B3LYP/6-31G(d,p) level

|   |             |             |            |
|---|-------------|-------------|------------|
| C | -2.20907200 | -3.52710300 | 0.00000000 |
| H | -1.20169600 | -3.94228300 | 0.00000000 |
| C | -2.30078100 | -2.11348400 | 0.00000000 |
| C | 3.50832500  | 2.64151200  | 0.00000000 |
| C | -2.32070900 | -0.89402300 | 0.00000000 |
| C | -2.41204100 | 0.51080700  | 0.00000000 |
| H | -3.41372300 | 0.93639200  | 0.00000000 |
| C | -1.35657300 | 1.37329800  | 0.00000000 |
| H | -1.57175500 | 2.44001900  | 0.00000000 |
| C | 0.00000000  | 1.00226600  | 0.00000000 |
| C | 1.19236900  | 0.74097400  | 0.00000000 |
| C | 2.55018000  | 0.37031200  | 0.00000000 |
| H | 2.76549400  | -0.69655500 | 0.00000000 |
| C | 3.60377400  | 1.22960500  | 0.00000000 |
| H | 4.60694700  | 0.80887800  | 0.00000000 |
| C | -3.26376100 | -4.36046400 | 0.00000000 |
| H | -4.28302700 | -3.98884100 | 0.00000000 |
| H | -3.12241700 | -5.43590200 | 0.00000000 |
| C | 3.47431000  | 3.85313900  | 0.00000000 |
| H | 3.42405200  | 4.91725600  | 0.00000000 |

**Table S31.** Cartesian coordinate of optimized structure of Me-**4D16A** ( $C_s$ ) at the B3LYP/6-31G(d,p) level

|   |             |             |             |
|---|-------------|-------------|-------------|
| C | -2.52790065 | 1.07158120  | 0.00000000  |
| C | -2.01280031 | -2.11161891 | 0.00000000  |
| C | -0.79900552 | -1.96264438 | 0.00000000  |
| C | -1.33665251 | 1.35051456  | 0.00000000  |
| C | 0.53436119  | -1.70864967 | 0.00000000  |
| C | 1.71665262  | -1.39617688 | 0.00000000  |
| C | 1.21518924  | 1.72800025  | 0.00000000  |
| C | 0.00000000  | 1.58639332  | 0.00000000  |
| C | 2.57632725  | 2.08616877  | 0.00000000  |
| H | 2.73096048  | 3.16569031  | 0.00000000  |
| C | 3.71410227  | 1.33358262  | 0.00000000  |
| C | 3.90808441  | -0.12067920 | 0.00000000  |
| H | 4.96652506  | -0.37546916 | 0.00000000  |
| C | 3.11455499  | -1.22529690 | 0.00000000  |
| H | 3.65762002  | -2.17163313 | 0.00000000  |
| C | -3.92710881 | 0.91989939  | 0.00000000  |
| H | -4.46595045 | 1.86831837  | 0.00000000  |
| C | -4.71693342 | -0.18970358 | 0.00000000  |
| H | -5.77952056 | 0.04420716  | 0.00000000  |
| C | -4.48465314 | -1.62546553 | 0.00000000  |
| H | -5.41910783 | -2.18301452 | 0.00000000  |
| C | -3.38427100 | -2.42752061 | 0.00000000  |
| H | -3.58959789 | -3.49853008 | 0.00000000  |
| C | 5.03378290  | 2.08285701  | 0.00000000  |
| H | 5.63314304  | 1.81890882  | 0.88016674  |
| H | 5.63314304  | 1.81890882  | -0.88016674 |
| H | 4.89040798  | 3.16516460  | 0.00000000  |

**Table S32.** Cartesian coordinate of optimized structure of type (i) reference compound for Me-**4D16A** ( $C_s$ ) at the B3LYP/6-

31G(d,p) level

|   |             |             |             |
|---|-------------|-------------|-------------|
| C | 2.50936853  | 0.96776959  | 0.00000000  |
| C | 1.95960826  | -2.18921606 | 0.00000000  |
| C | 0.75062758  | -1.98571770 | 0.00000000  |
| C | 1.32591505  | 1.28118441  | 0.00000000  |
| C | -0.56340324 | -1.67320769 | 0.00000000  |
| C | -1.73493955 | -1.31218807 | 0.00000000  |
| C | -1.19740610 | 1.80205200  | 0.00000000  |
| C | 0.00000000  | 1.57706523  | 0.00000000  |
| C | -3.81262717 | 1.42346541  | 0.00000000  |
| C | -3.93806799 | -0.03220249 | 0.00000000  |
| H | -4.98981043 | -0.31200712 | 0.00000000  |
| C | -3.12390179 | -1.12529680 | 0.00000000  |
| H | -3.66660300 | -2.07239705 | 0.00000000  |
| C | 3.90051906  | 0.78938386  | 0.00000000  |
| H | 4.45306402  | 1.73012686  | 0.00000000  |
| C | 4.68084980  | -0.33280932 | 0.00000000  |
| H | 5.74533216  | -0.10724856 | 0.00000000  |
| C | 4.43372495  | -1.75571287 | 0.00000000  |
| H | 5.35821202  | -2.32971167 | 0.00000000  |
| C | 3.31352037  | -2.54011844 | 0.00000000  |
| H | 3.49760055  | -3.61510611 | 0.00000000  |
| C | -2.55599638 | 2.31630871  | 0.00000000  |
| H | -2.64871722 | 2.97891794  | 0.87168080  |
| H | -2.64871722 | 2.97891794  | -0.87168080 |
| C | -4.97563323 | 2.11256418  | 0.00000000  |
| H | -4.99635287 | 3.19832974  | 0.00000000  |
| H | -5.93695698 | 1.61023429  | 0.00000000  |

**Table S33.** Cartesian coordinate of optimized structure of **4D16A** ( $D_{2h}$ ) at the B3LYP/6-31G(d,p) level

|   |             |             |             |
|---|-------------|-------------|-------------|
| C | 1.61307301  | 1.89964381  | -0.00000000 |
| C | -1.61307301 | 1.89964381  | 0.00000000  |
| C | -1.68520512 | 0.67875927  | 0.00000000  |
| C | 1.68520512  | 0.67875927  | -0.00000000 |
| C | -1.68520512 | -0.67875927 | 0.00000000  |
| C | -1.61307301 | -1.89964381 | 0.00000000  |
| C | 1.61307301  | -1.89964381 | -0.00000000 |
| C | 1.68520512  | -0.67875927 | -0.00000000 |
| C | 1.69563430  | -3.30517700 | -0.00000000 |
| H | 2.71908467  | -3.68196698 | -0.00000000 |
| C | 0.72750588  | -4.26214128 | 0.00000000  |
| H | 1.12811016  | -5.27374309 | 0.00000000  |
| C | -0.72750588 | -4.26214128 | 0.00000000  |
| H | -1.12811016 | -5.27374309 | 0.00000000  |
| C | -1.69563430 | -3.30517700 | 0.00000000  |
| H | -2.71908467 | -3.68196698 | 0.00000000  |
| C | 1.69563430  | 3.30517700  | -0.00000000 |
| H | 2.71908467  | 3.68196698  | -0.00000000 |
| C | 0.72750588  | 4.26214128  | -0.00000000 |
| H | 1.12811016  | 5.27374309  | -0.00000000 |
| C | -0.72750588 | 4.26214128  | -0.00000000 |
| H | -1.12811016 | 5.27374309  | -0.00000000 |
| C | -1.69563430 | 3.30517700  | -0.00000000 |
| H | -2.71908467 | 3.68196698  | 0.00000000  |

**Table S34.** Cartesian coordinate of optimized structure of type (ii) reference compound for Me-**4D16A** ( $C_{2h}$ ) at the B3LYP/6-

31G(d,p) level

|   |             |             |            |
|---|-------------|-------------|------------|
| C | 0.00931300  | 1.90263200  | 0.00000000 |
| C | 3.43954500  | 5.93965000  | 0.00000000 |
| C | 0.00000000  | 0.67683800  | 0.00000000 |
| C | -3.43975500 | -5.93946600 | 0.00000000 |
| C | -0.00913500 | -1.90281900 | 0.00000000 |
| C | 0.00030900  | -0.67702400 | 0.00000000 |
| C | 0.03638100  | -3.30821100 | 0.00000000 |
| H | 1.02854900  | -3.75672200 | 0.00000000 |
| C | -1.04766700 | -4.13471600 | 0.00000000 |
| H | -0.87094000 | -5.20685900 | 0.00000000 |

|   |             |             |            |
|---|-------------|-------------|------------|
| C | -2.41727600 | -3.69586300 | 0.00000000 |
| H | -2.59491200 | -2.62368800 | 0.00000000 |
| C | -3.49580500 | -4.52298200 | 0.00000000 |
| H | -4.49059800 | -4.08251900 | 0.00000000 |
| C | -0.03628700 | 3.30802200  | 0.00000000 |
| H | -1.02849300 | 3.75644900  | 0.00000000 |
| C | 1.04768200  | 4.13462600  | 0.00000000 |
| H | 0.87084200  | 5.20675200  | 0.00000000 |
| C | 2.41733800  | 3.69592400  | 0.00000000 |
| H | 2.59510200  | 2.62377000  | 0.00000000 |
| C | 3.49576800  | 4.52317300  | 0.00000000 |
| H | 4.49061500  | 4.08283100  | 0.00000000 |
| C | 3.42872900  | 7.15229000  | 0.00000000 |
| H | 3.41373800  | 8.21757600  | 0.00000000 |
| C | -3.42908500 | -7.15210700 | 0.00000000 |
| H | -3.41423400 | -8.21739500 | 0.00000000 |

**Table S35.** Cartesian coordinate of optimized structure of Me-**3D16A**(R=H) ( $C_s$ ) at the B3LYP/6-31G(d,p) level

|   |             |             |             |
|---|-------------|-------------|-------------|
| C | -2.52538976 | -1.04145238 | 0.00000000  |
| C | -2.44440102 | 0.17825515  | 0.00000000  |
| C | -2.13943029 | 1.50501204  | 0.00000000  |
| C | -1.69007937 | 2.64228370  | 0.00000000  |
| C | -2.44359269 | -2.46178178 | 0.00000000  |
| C | -0.97240242 | 3.86140591  | 0.00000000  |
| H | -1.52921701 | 4.79471976  | 0.00000000  |
| C | -1.21374605 | -3.05611964 | 0.00000000  |
| H | -1.17685474 | -4.14439340 | 0.00000000  |
| C | 0.39092709  | 3.88437654  | 0.00000000  |
| H | 0.88714936  | 4.85295052  | 0.00000000  |
| C | 0.04341647  | -2.34873240 | 0.00000000  |
| H | 0.00000000  | -1.26280404 | 0.00000000  |
| C | 1.22105870  | 2.70482164  | 0.00000000  |
| H | 0.71119933  | 1.74512650  | 0.00000000  |
| C | 1.25985430  | -2.95173714 | 0.00000000  |
| H | 1.30703976  | -4.03938740 | 0.00000000  |
| C | 2.57814401  | 2.72261658  | 0.00000000  |
| H | 3.09135635  | 3.68296205  | 0.00000000  |
| C | 2.54337609  | -2.27673067 | 0.00000000  |
| H | 3.42048869  | -2.92421238 | 0.00000000  |
| C | 3.44202308  | 1.55729683  | 0.00000000  |
| H | 4.51362270  | 1.75592658  | 0.00000000  |
| C | 2.77551966  | -0.95659301 | 0.00000000  |
| C | 3.06678276  | 0.27034424  | 0.00000000  |
| C | -3.72924413 | -3.25182231 | 0.00000000  |
| H | -4.33655293 | -3.01172189 | 0.88037025  |
| H | -4.33655293 | -3.01172189 | -0.88037025 |
| H | -3.52857711 | -4.32610423 | 0.00000000  |

**Table S36.** Cartesian coordinate of optimized structure of type (i) reference compound for Me-**3D16A**(R=H) ( $C_s$ ) at the B3LYP/6-31G(d,p) level

|   |             |             |            |
|---|-------------|-------------|------------|
| C | 2.47185087  | -1.28513783 | 0.00000000 |
| C | 2.41344877  | -0.06155854 | 0.00000000 |
| C | 2.22068701  | 1.27712654  | 0.00000000 |
| C | 1.89502114  | 2.46021286  | 0.00000000 |
| C | 2.37277810  | -2.69792678 | 0.00000000 |
| C | 1.31726639  | 3.73707249  | 0.00000000 |
| H | 1.96850884  | 4.60734438  | 0.00000000 |
| C | -0.04606861 | 3.90777148  | 0.00000000 |
| H | -0.43247750 | 4.92527992  | 0.00000000 |
| C | -0.20547720 | -2.38514972 | 0.00000000 |
| H | 0.00000000  | -1.31852628 | 0.00000000 |
| C | -0.98383283 | 2.83283605  | 0.00000000 |
| H | -0.57840974 | 1.82443234  | 0.00000000 |
| C | -1.48673615 | -2.81119404 | 0.00000000 |
| H | -1.67642821 | -3.88450919 | 0.00000000 |
| C | -2.34101076 | 2.97882617  | 0.00000000 |
| H | -2.76313211 | 3.98240558  | 0.00000000 |
| C | -2.68466299 | -1.99632998 | 0.00000000 |

|   |             |             |             |
|---|-------------|-------------|-------------|
| H | -3.62402957 | -2.55040402 | 0.00000000  |
| C | -3.28838031 | 1.89834071  | 0.00000000  |
| H | -4.34232918 | 2.17527227  | 0.00000000  |
| C | -2.79561134 | -0.65799374 | 0.00000000  |
| C | -3.00702217 | 0.58128820  | 0.00000000  |
| C | 0.97126478  | -3.32837206 | 0.00000000  |
| H | 0.90849848  | -3.99147882 | 0.87367502  |
| H | 0.90849848  | -3.99147882 | -0.87367502 |
| C | 3.47197973  | -3.47745512 | 0.00000000  |
| H | 4.46863597  | -3.05184588 | 0.00000000  |
| H | 3.38969797  | -4.56063165 | 0.00000000  |

**Table S37.** Cartesian coordinate of optimized structure of **3D16A**(R=H) ( $C_{2v}$ ) at the B3LYP/6-31G(d,p) level

|   |            |             |             |
|---|------------|-------------|-------------|
| C | 0.00000000 | 1.88758700  | -2.47600500 |
| C | 0.00000000 | 0.68050000  | -2.67238800 |
| C | 0.00000000 | -0.68050000 | -2.67238800 |
| C | 0.00000000 | -1.88758700 | -2.47600500 |
| C | 0.00000000 | 3.23470400  | -2.04455500 |
| H | 0.00000000 | 4.02180700  | -2.79410600 |
| C | 0.00000000 | -3.23470400 | -2.04455500 |
| H | 0.00000000 | -4.02180700 | -2.79410600 |
| C | 0.00000000 | 3.56026900  | -0.72095300 |
| H | 0.00000000 | 4.61465200  | -0.45186400 |
| C | 0.00000000 | -3.56026900 | -0.72095300 |
| H | 0.00000000 | -4.61465200 | -0.45186400 |
| C | 0.00000000 | 2.59362000  | 0.35066900  |
| H | 0.00000000 | 1.54466600  | 0.06611700  |
| C | 0.00000000 | -2.59362000 | 0.35066900  |
| H | 0.00000000 | -1.54466600 | 0.06611700  |
| C | 0.00000000 | 2.91250600  | 1.66946200  |
| H | 0.00000000 | 3.96263700  | 1.95688600  |
| C | 0.00000000 | -2.91250600 | 1.66946200  |
| H | 0.00000000 | -3.96263700 | 1.95688600  |
| C | 0.00000000 | 1.96849300  | 2.77169200  |
| H | 0.00000000 | 2.40299200  | 3.77131100  |
| C | 0.00000000 | -1.96849300 | 2.77169200  |
| H | 0.00000000 | -2.40299200 | 3.77131100  |
| C | 0.00000000 | 0.63065800  | 2.69735600  |
| C | 0.00000000 | -0.63065800 | 2.69735600  |

**Table S38.** Cartesian coordinate of optimized structure of type (ii) reference compound for **3D16A**(R=H) ( $C_{2v}$ ) at the B3LYP/6-31G(d,p) level

|   |            |             |             |
|---|------------|-------------|-------------|
| C | 0.00000000 | 7.15637400  | 0.13246100  |
| C | 0.00000000 | -7.15637400 | 0.13246100  |
| C | 0.00000000 | 6.32363700  | 1.27815700  |
| H | 0.00000000 | 6.82926000  | 2.24124300  |
| C | 0.00000000 | -6.32363700 | 1.27815700  |
| H | 0.00000000 | -6.82926000 | 2.24124300  |
| C | 0.00000000 | 4.96219200  | 1.25442600  |
| H | 0.00000000 | 4.44363800  | 2.21122000  |
| C | 0.00000000 | -4.96219200 | 1.25442600  |
| H | 0.00000000 | -4.44363800 | 2.21122000  |
| C | 0.00000000 | 4.14997700  | 0.07248200  |
| H | 0.00000000 | 4.66566000  | -0.88610600 |
| C | 0.00000000 | -4.14997700 | 0.07248200  |
| H | 0.00000000 | -4.66566000 | -0.88610600 |
| C | 0.00000000 | 2.78701100  | 0.09594100  |
| H | 0.00000000 | 2.27147100  | 1.05478800  |
| C | 0.00000000 | -2.78701100 | 0.09594100  |
| H | 0.00000000 | -2.27147100 | 1.05478800  |
| C | 0.00000000 | 1.97122900  | -1.08188500 |
| H | 0.00000000 | 2.48185000  | -2.04542200 |
| C | 0.00000000 | -1.97122900 | -1.08188500 |
| H | 0.00000000 | -2.48185000 | -2.04542200 |
| C | 0.00000000 | 0.62809500  | -1.07344900 |
| C | 0.00000000 | -0.62809500 | -1.07344900 |
| C | 0.00000000 | 7.89716700  | -0.82827600 |
| H | 0.00000000 | 8.54373700  | -1.67487100 |

|   |           |             |             |
|---|-----------|-------------|-------------|
| C | 0.0000000 | -7.89716700 | -0.82827600 |
| H | 0.0000000 | -8.54373700 | -1.67487100 |

**Table S39.** Cartesian coordinate of optimized structure of **3D16A**(R=*t*-Bu) (C<sub>2v</sub> at the B3LYP/6-31G(d,p) level

|   |             |             |             |
|---|-------------|-------------|-------------|
| C | 0.0000000   | 1.88701220  | -2.80100973 |
| C | 0.0000000   | 0.68049905  | -2.99590255 |
| C | -0.0000000  | -0.68049905 | -2.99590255 |
| C | -0.0000000  | -1.88701220 | -2.80100973 |
| C | 0.0000000   | 3.24900972  | -2.38496981 |
| C | -0.0000000  | -3.24900972 | -2.38496981 |
| C | 0.0000000   | 3.49963051  | -1.04216816 |
| H | 0.0000000   | 4.53496310  | -0.71246803 |
| C | -0.0000000  | -3.49963051 | -1.04216816 |
| H | -0.0000000  | -4.53496310 | -0.71246803 |
| C | 0.0000000   | 2.50484899  | 0.00681232  |
| H | 0.0000000   | 1.45725582  | -0.27952757 |
| C | -0.0000000  | -2.50484899 | 0.00681232  |
| H | -0.0000000  | -1.45725582 | -0.27952757 |
| C | 0.0000000   | 2.85235069  | 1.32083861  |
| H | 0.0000000   | 3.91589088  | 1.53410847  |
| C | -0.0000000  | -2.85235069 | 1.32083861  |
| H | -0.0000000  | -3.91589088 | 1.53410847  |
| C | 0.0000000   | 1.97941163  | 2.48464761  |
| C | -0.0000000  | -1.97941163 | 2.48464761  |
| C | 0.0000000   | 0.63108345  | 2.38775929  |
| C | -0.0000000  | -0.63108345 | 2.38775929  |
| C | 0.0000000   | 2.60592208  | 3.91305213  |
| C | -0.0000000  | -2.60592208 | 3.91305213  |
| C | -0.0000000  | -4.32735996 | -3.47928529 |
| C | 0.0000000   | 4.32735996  | -3.47928529 |
| C | 1.26056260  | -4.14352570 | -4.35673409 |
| H | 1.26440166  | -4.87272653 | -5.17438997 |
| H | 1.29495483  | -3.14141879 | -4.79410067 |
| H | 2.17229125  | -4.28606089 | -3.76753013 |
| C | -1.26056260 | -4.14352570 | -4.35673409 |
| H | -1.29495483 | -3.14141879 | -4.79410067 |
| H | -1.26440166 | -4.87272653 | -5.17438997 |
| H | -2.17229125 | -4.28606089 | -3.76753013 |
| C | -0.0000000  | -5.74948102 | -2.89601543 |
| H | 0.88780618  | -5.93776985 | -2.28355331 |
| H | -0.88780618 | -5.93776985 | -2.28355331 |
| H | -0.0000000  | -6.48019812 | -3.71107057 |
| C | 1.26056260  | 4.14352570  | -4.35673409 |
| H | 1.29495483  | 3.14141879  | -4.79410067 |
| H | 1.26440166  | 4.87272653  | -5.17438997 |
| H | 2.17229125  | 4.28606089  | -3.76753013 |
| C | 0.0000000   | 5.74948102  | -2.89601543 |
| H | -0.88780618 | 5.93776985  | -2.28355331 |
| H | 0.88780618  | 5.93776985  | -2.28355331 |
| H | 0.0000000   | 6.48019812  | -3.71107057 |
| C | -1.26056260 | 4.14352570  | -4.35673409 |
| H | -2.17229125 | 4.28606089  | -3.76753013 |
| H | -1.26440166 | 4.87272653  | -5.17438997 |
| H | -1.29495483 | 3.14141879  | -4.79410067 |
| C | 1.26267058  | 2.14113457  | 4.67191426  |
| H | 1.27354821  | 2.55636932  | 5.68602568  |
| H | 1.29882791  | 1.05258345  | 4.75043865  |
| H | 2.17223940  | 2.47100553  | 4.15942859  |
| C | 0.0000000   | 4.14773118  | 3.89976570  |
| H | 0.88849616  | 4.55910553  | 3.41019178  |
| H | -0.88849616 | 4.55910553  | 3.41019178  |
| H | 0.0000000   | 4.51067493  | 4.93262618  |
| C | -1.26267058 | 2.14113457  | 4.67191426  |
| H | -1.29882791 | 1.05258345  | 4.75043865  |
| H | -1.27354821 | 2.55636932  | 5.68602568  |
| H | -2.17223940 | 2.47100553  | 4.15942859  |
| C | 1.26267058  | -2.14113457 | 4.67191426  |
| H | 1.29882791  | -1.05258345 | 4.75043865  |
| H | 1.27354821  | -2.55636932 | 5.68602568  |
| H | 2.17223940  | -2.47100553 | 4.15942859  |
| C | -0.0000000  | -4.14773118 | 3.89976570  |

|   |             |             |            |
|---|-------------|-------------|------------|
| H | -0.88849616 | -4.55910553 | 3.41019178 |
| H | 0.88849616  | -4.55910553 | 3.41019178 |
| H | -0.00000000 | -4.51067493 | 4.93262618 |
| C | -1.26267058 | -2.14113457 | 4.67191426 |
| H | -1.29882791 | -1.05258345 | 4.75043865 |
| H | -2.17223940 | -2.47100553 | 4.15942859 |
| H | -1.27354821 | -2.55636932 | 5.68602568 |

**Table S40.** Cartesian coordinate of optimized structure of Me-**3D20A**(R=H) ( $C_s$ ) at the B3LYP/6-31G(d,p) level

|   |             |             |             |
|---|-------------|-------------|-------------|
| C | 4.59196036  | 0.28724837  | 0.00000000  |
| C | 3.98944491  | 1.48829391  | 0.00000000  |
| C | 3.45645631  | 2.62735917  | 0.00000000  |
| C | 2.91059192  | 3.85529952  | 0.00000000  |
| C | 3.94515916  | -1.00290329 | 0.00000000  |
| C | 1.50045082  | 4.16433835  | 0.00000000  |
| C | 2.60047763  | -1.21967784 | 0.00000000  |
| C | 0.48844390  | 3.25331203  | 0.00000000  |
| C | -0.91008066 | 3.57217999  | 0.00000000  |
| C | 1.97327193  | -2.50995972 | 0.00000000  |
| C | -1.87844323 | 2.61549337  | 0.00000000  |
| C | 0.62126920  | -2.66945549 | 0.00000000  |
| C | -0.07005588 | -3.92997339 | 0.00000000  |
| C | -3.29504203 | 2.85792239  | 0.00000000  |
| C | -4.23919891 | 1.87079598  | 0.00000000  |
| C | -1.43100610 | -4.07092804 | 0.00000000  |
| C | -2.26031173 | -2.91951989 | 0.00000000  |
| C | -3.90098733 | 0.50094009  | 0.00000000  |
| C | -2.90435126 | -1.87868332 | 0.00000000  |
| C | -3.48888265 | -0.65202729 | 0.00000000  |
| H | 5.68167643  | 0.28109058  | 0.00000000  |
| H | 3.59383198  | 4.70389949  | 0.00000000  |
| H | 4.61120139  | -1.86379912 | 0.00000000  |
| H | 1.24887913  | 5.22344540  | 0.00000000  |
| H | 1.93884515  | -0.35421215 | 0.00000000  |
| H | 0.74835803  | 2.19552930  | 0.00000000  |
| H | -1.19209929 | 4.62537815  | 0.00000000  |
| H | 2.61925344  | -3.38819610 | 0.00000000  |
| H | -1.56891730 | 1.57261609  | 0.00000000  |
| H | 0.00000000  | -1.77645790 | 0.00000000  |
| H | 0.53271746  | -4.83663519 | 0.00000000  |
| H | -3.63578835 | 3.89133632  | 0.00000000  |
| H | -5.29321577 | 2.13753782  | 0.00000000  |
| C | -2.10395703 | -5.42337289 | 0.00000000  |
| H | -2.74579300 | -5.54175905 | 0.88047585  |
| H | -2.74579300 | -5.54175905 | -0.88047585 |
| H | -1.36441240 | -6.22810681 | 0.00000000  |

**Table S41.** Cartesian coordinate of optimized structure of type (i) reference compound for Me-**3D20A**(R=H) ( $C_s$ ) at the B3LYP/6-31G(d,p) level

|   |             |             |            |
|---|-------------|-------------|------------|
| C | -1.17662930 | -4.36366889 | 0.00000000 |
| C | -2.25165155 | -3.55181287 | 0.00000000 |
| C | -3.28424131 | -2.83993402 | 0.00000000 |
| C | -4.40076044 | -2.08289030 | 0.00000000 |
| C | 0.20827496  | -3.97769216 | 0.00000000 |
| C | -4.44267755 | -0.64972182 | 0.00000000 |
| C | 0.70035798  | -2.70645006 | 0.00000000 |
| C | -3.34743837 | 0.16949007  | 0.00000000 |
| C | -3.37653376 | 1.59300581  | 0.00000000 |
| C | 2.10325325  | -2.38745215 | 0.00000000 |
| C | -2.23212292 | 2.34205390  | 0.00000000 |
| C | 2.59071474  | -1.12786187 | 0.00000000 |
| C | -2.16247656 | 3.76618546  | 0.00000000 |
| C | -0.98686133 | 4.47565818  | 0.00000000 |
| C | 4.42080558  | 0.70407773  | 0.00000000 |
| C | 3.37571799  | 1.66230332  | 0.00000000 |
| C | 0.27038290  | 3.85442407  | 0.00000000 |
| C | 2.41748830  | 2.42548848  | 0.00000000 |
| C | 1.31747428  | 3.21463360  | 0.00000000 |

|   |             |             |             |
|---|-------------|-------------|-------------|
| H | -1.37510344 | -5.43539792 | 0.00000000  |
| H | -5.35748292 | -2.60366320 | 0.00000000  |
| H | 0.92046214  | -4.80119311 | 0.00000000  |
| H | -5.43332269 | -0.19862365 | 0.00000000  |
| H | 0.00000000  | -1.87213190 | 0.00000000  |
| H | -2.36396980 | -0.29861445 | 0.00000000  |
| H | -4.34696682 | 2.08984558  | 0.00000000  |
| H | 2.79635072  | -3.23057051 | 0.00000000  |
| H | -1.28136068 | 1.81301015  | 0.00000000  |
| H | 1.88971552  | -0.29690168 | 0.00000000  |
| H | -3.09516664 | 4.32676312  | 0.00000000  |
| H | -1.01993550 | 5.56254243  | 0.00000000  |
| C | 4.05850504  | -0.78896913 | 0.00000000  |
| H | 4.54157262  | -1.24725411 | 0.87378676  |
| H | 4.54157262  | -1.24725411 | -0.87378676 |
| C | 5.71162780  | 1.09222659  | 0.00000000  |
| H | 5.98913714  | 2.13979676  | 0.00000000  |
| H | 6.51523950  | 0.36108304  | 0.00000000  |

**Table S42.** Cartesian coordinate of optimized structure of **3D20A**(R=H) ( $D_{4h}$ ) at the B3LYP/6-31G(d,p) level

|   |            |             |             |
|---|------------|-------------|-------------|
| C | 0.00000000 | 1.97193100  | 4.01769500  |
| C | 0.00000000 | 0.62888400  | 3.98491400  |
| C | 0.00000000 | -0.62888400 | 3.98491400  |
| C | 0.00000000 | -1.97193100 | 4.01769500  |
| C | 0.00000000 | 2.85908000  | 2.87857700  |
| C | 0.00000000 | -2.85908000 | 2.87857700  |
| C | 0.00000000 | 2.47457800  | 1.57248800  |
| C | 0.00000000 | -2.47457800 | 1.57248800  |
| C | 0.00000000 | -3.36753500 | 0.44925900  |
| C | 0.00000000 | 3.36753500  | 0.44925900  |
| C | 0.00000000 | -2.92458600 | -0.83768300 |
| C | 0.00000000 | 2.92458600  | -0.83768300 |
| C | 0.00000000 | 3.75781900  | -2.00940800 |
| C | 0.00000000 | -3.75781900 | -2.00940800 |
| C | 0.00000000 | -3.27752000 | -3.28791900 |
| C | 0.00000000 | 3.27752000  | -3.28791900 |
| C | 0.00000000 | 1.89687400  | -3.57845400 |
| C | 0.00000000 | -1.89687400 | -3.57845400 |
| C | 0.00000000 | 0.67908900  | -3.70744800 |
| C | 0.00000000 | -0.67908900 | -3.70744800 |
| H | 0.00000000 | 2.44422300  | 4.99959000  |
| H | 0.00000000 | -2.44422300 | 4.99959000  |
| H | 0.00000000 | 3.92289600  | 3.10902200  |
| H | 0.00000000 | -3.92289600 | 3.10902200  |
| H | 0.00000000 | 1.40848100  | 1.34911400  |
| H | 0.00000000 | -1.40848100 | 1.34911400  |
| H | 0.00000000 | -4.43890300 | 0.65113900  |
| H | 0.00000000 | 4.43890300  | 0.65113900  |
| H | 0.00000000 | -1.85064100 | -1.01120200 |
| H | 0.00000000 | 1.85064100  | -1.01120200 |
| H | 0.00000000 | 4.83666000  | -1.86809300 |
| H | 0.00000000 | -4.83666000 | -1.86809300 |
| H | 0.00000000 | -3.97542300 | -4.12169300 |
| H | 0.00000000 | 3.97542300  | -4.12169300 |

**Table S43.** Cartesian coordinate of optimized structure of type (ii) reference compound for **3D20A**(R=H) ( $C_s$ ) at the B3LYP/6-31G(d,p) level

|   |            |             |             |
|---|------------|-------------|-------------|
| C | 0.00000000 | 1.97284900  | -1.79250900 |
| C | 0.00000000 | 0.62740700  | -1.78363900 |
| C | 0.00000000 | -0.62740700 | -1.78363900 |
| C | 0.00000000 | -1.97284900 | -1.79250900 |
| C | 0.00000000 | 2.78890700  | -0.61910800 |
| C | 0.00000000 | -2.78890700 | -0.61910800 |
| C | 0.00000000 | 4.15514100  | -0.64312200 |
| C | 0.00000000 | -4.15514100 | -0.64312200 |
| C | 0.00000000 | -4.97752900 | 0.52595600  |
| C | 0.00000000 | 4.97752900  | 0.52595600  |
| C | 0.00000000 | -6.34066000 | 0.50831000  |



|   |            |              |             |
|---|------------|--------------|-------------|
| C | 0.00000000 | 6.34066000   | 0.50831000  |
| C | 0.00000000 | 7.14976900   | 1.69260100  |
| C | 0.00000000 | -7.14976900  | 1.69260100  |
| C | 0.00000000 | -8.51113200  | 1.72191300  |
| C | 0.00000000 | 8.51113200   | 1.72191300  |
| C | 0.00000000 | 9.34845400   | 0.57947100  |
| C | 0.00000000 | -9.34845400  | 0.57947100  |
| H | 0.00000000 | 2.48093400   | -2.75756200 |
| H | 0.00000000 | -2.48093400  | -2.75756200 |
| H | 0.00000000 | 2.27704800   | 0.34154800  |
| H | 0.00000000 | -2.27704800  | 0.34154800  |
| H | 0.00000000 | 4.66049500   | -1.60877800 |
| H | 0.00000000 | -4.66049500  | -1.60877800 |
| H | 0.00000000 | -4.46747400  | 1.48978200  |
| H | 0.00000000 | 4.46747400   | 1.48978200  |
| H | 0.00000000 | -6.86045300  | -0.44811200 |
| H | 0.00000000 | 6.86045300   | -0.44811200 |
| H | 0.00000000 | 6.62816000   | 2.64788300  |
| H | 0.00000000 | -6.62816000  | 2.64788300  |
| H | 0.00000000 | -9.01306400  | 2.68692600  |
| H | 0.00000000 | 9.01306400   | 2.68692600  |
| C | 0.00000000 | 10.09336200  | -0.37814800 |
| H | 0.00000000 | 10.74339600  | -1.22203100 |
| C | 0.00000000 | -10.09336200 | -0.37814800 |
| H | 0.00000000 | -10.74339600 | -1.22203100 |

**Table S44.** Cartesian coordinate of optimized structure of **3D20A**(R=*t*-Bu) ( $C_{2v}$  at the B3LYP/6-31G(d,p) level

|   |             |             |             |
|---|-------------|-------------|-------------|
| C | 0.00000000  | 1.98205163  | 3.81372985  |
| C | 0.00000000  | 0.62861517  | 3.76124879  |
| C | 0.00000000  | -0.62861517 | 3.76124879  |
| C | 0.00000000  | -1.98205163 | 3.81372985  |
| C | 0.00000000  | 2.78753418  | 2.61166434  |
| C | -0.00000000 | -2.78753418 | 2.61166434  |
| C | 0.00000000  | 2.34955969  | 1.31993123  |
| C | -0.00000000 | -2.34955969 | 1.31993123  |
| C | -0.00000000 | -3.23470707 | 0.19121451  |
| C | 0.00000000  | 3.23470707  | 0.19121451  |
| C | -0.00000000 | -2.81729065 | -1.10475571 |
| C | 0.00000000  | 2.81729065  | -1.10475571 |
| C | 0.00000000  | 3.69866631  | -2.24296350 |
| C | -0.00000000 | -3.69866631 | -2.24296350 |
| C | -0.00000000 | -3.29255413 | -3.55018167 |
| C | 0.00000000  | 3.29255413  | -3.55018167 |
| C | -0.00000000 | 1.89670042  | -3.82042879 |
| C | -0.00000000 | -1.89670042 | -3.82042879 |
| C | -0.00000000 | 0.67970768  | -3.95052712 |
| C | -0.00000000 | -0.67970768 | -3.95052712 |
| H | 0.00000000  | 3.86307143  | 2.75456344  |
| H | -0.00000000 | -3.86307143 | 2.75456344  |
| H | 0.00000000  | 1.27970926  | 1.11806749  |
| H | -0.00000000 | -1.27970926 | 1.11806749  |
| H | -0.00000000 | -4.30518664 | 0.40102929  |
| H | 0.00000000  | 4.30518664  | 0.40102929  |
| H | -0.00000000 | -1.74875303 | -1.30534849 |
| H | 0.00000000  | 1.74875303  | -1.30534849 |
| H | 0.00000000  | 4.76389223  | -2.03091193 |
| H | -0.00000000 | -4.76389223 | -2.03091193 |
| C | 0.00000000  | -2.65667343 | 5.21560883  |
| C | 0.00000000  | 2.65667343  | 5.21560883  |
| C | -0.00000000 | -4.24093592 | -4.76150919 |
| C | 0.00000000  | 4.24093592  | -4.76150919 |
| C | 1.26159419  | -2.21418890 | 5.99042124  |
| H | 1.29432402  | -1.12785729 | 6.10368994  |
| H | 1.27221709  | -2.66178676 | 6.99065080  |
| H | 2.17246003  | -2.52527144 | 5.46858553  |
| C | 0.00000000  | -4.19559607 | 5.14083764  |
| H | -0.88822282 | -4.58483759 | 4.63284754  |
| H | 0.88822282  | -4.58483759 | 4.63284754  |
| H | 0.00000000  | -4.60342460 | 6.15679520  |
| C | -1.26159419 | -2.21418890 | 5.99042124  |
| H | -1.27221709 | -2.66178676 | 6.99065080  |

|   |             |             |             |
|---|-------------|-------------|-------------|
| H | -1.29432402 | -1.12785729 | 6.10368994  |
| H | -2.17246003 | -2.52527144 | 5.46858553  |
| C | 1.26159419  | 2.21418890  | 5.99042124  |
| H | 1.27221709  | 2.66178676  | 6.99065080  |
| H | 1.29432402  | 1.12785729  | 6.10368994  |
| H | 2.17246003  | 2.52527144  | 5.46858553  |
| C | 0.00000000  | 4.19559607  | 5.14083764  |
| H | 0.88822282  | 4.58483759  | 4.63284754  |
| H | -0.88822282 | 4.58483759  | 4.63284754  |
| H | 0.00000000  | 4.60342460  | 6.15679520  |
| C | -1.26159419 | 2.21418890  | 5.99042124  |
| H | -2.17246003 | 2.52527144  | 5.46858553  |
| H | -1.29432402 | 1.12785729  | 6.10368994  |
| H | -1.27221709 | 2.66178676  | 6.99065080  |
| C | 0.00000000  | 5.72001399  | -4.34229923 |
| H | -0.88781446 | 5.97685218  | -3.75515883 |
| H | 0.88781446  | 5.97685218  | -3.75515883 |
| H | 0.00000000  | 6.35388113  | -5.23477527 |
| C | -1.26070093 | 3.95994414  | -5.61230092 |
| H | -1.26589338 | 4.59401868  | -6.50575680 |
| H | -1.29420448 | 2.91568183  | -5.93593525 |
| H | -2.17231651 | 4.16596331  | -5.04206438 |
| C | 1.26070093  | 3.95994414  | -5.61230092 |
| H | 1.29420448  | 2.91568183  | -5.93593525 |
| H | 1.26589338  | 4.59401868  | -6.50575680 |
| H | 2.17231651  | 4.16596331  | -5.04206438 |
| C | 1.26070093  | -3.95994414 | -5.61230092 |
| H | 1.26589338  | -4.59401868 | -6.50575680 |
| H | 1.29420448  | -2.91568183 | -5.93593525 |
| H | 2.17231651  | -4.16596331 | -5.04206438 |
| C | -0.00000000 | -5.72001399 | -4.34229923 |
| H | 0.88781446  | -5.97685218 | -3.75515883 |
| H | -0.88781446 | -5.97685218 | -3.75515883 |
| H | -0.00000000 | -6.35388113 | -5.23477527 |
| C | -1.26070093 | -3.95994414 | -5.61230092 |
| H | -2.17231651 | -4.16596331 | -5.04206438 |
| H | -1.29420448 | -2.91568183 | -5.93593525 |
| H | -1.26589338 | -4.59401868 | -6.50575680 |

**Table S45.** Cartesian coordinate of optimized structure of Me-**3D24A**(R=H) ( $C_s$ ) at the B3LYP/6-31G(d,p) level

|   |             |             |            |
|---|-------------|-------------|------------|
| C | 4.72721591  | -3.37237206 | 0.00000000 |
| C | 5.13005289  | -2.08773849 | 0.00000000 |
| C | 5.52382365  | -0.89560828 | 0.00000000 |
| C | 5.95661449  | 0.37930977  | 0.00000000 |
| C | 3.36645740  | -3.83942080 | 0.00000000 |
| C | 5.12704986  | 1.55515152  | 0.00000000 |
| C | 2.25272172  | -3.04986709 | 0.00000000 |
| C | 3.76222711  | 1.56430034  | 0.00000000 |
| C | 2.94620696  | 2.73798787  | 0.00000000 |
| C | 0.90601654  | -3.52951366 | 0.00000000 |
| C | 1.58250507  | 2.69203873  | 0.00000000 |
| C | -0.17914001 | -2.70208198 | 0.00000000 |
| C | -1.55131866 | -3.11502080 | 0.00000000 |
| C | 0.70046156  | 3.82092690  | 0.00000000 |
| C | -0.65571993 | 3.68861514  | 0.00000000 |
| C | -2.58506333 | -2.22727078 | 0.00000000 |
| C | -1.59888209 | 4.76919076  | 0.00000000 |
| C | -2.95615833 | 4.60425685  | 0.00000000 |
| C | -4.73723094 | -0.27806953 | 0.00000000 |
| C | -3.57655043 | 3.33989134  | 0.00000000 |
| C | -4.04085923 | 2.20592042  | 0.00000000 |
| C | -4.45830867 | 0.91469248  | 0.00000000 |
| H | 7.03384310  | 0.54135225  | 0.00000000 |
| H | 3.23667425  | -4.92010508 | 0.00000000 |
| H | 5.65387123  | 2.50772238  | 0.00000000 |
| H | 2.38987094  | -1.96906876 | 0.00000000 |
| H | 3.24376345  | 0.60621749  | 0.00000000 |
| H | 3.44647904  | 3.70653094  | 0.00000000 |
| H | 0.75125087  | -4.60856369 | 0.00000000 |
| H | 1.10676454  | 1.71112816  | 0.00000000 |
| H | 0.00000000  | -1.62656462 | 0.00000000 |

|   |             |             |             |
|---|-------------|-------------|-------------|
| H | -1.76061216 | -4.18483445 | 0.00000000  |
| H | 1.14471728  | 4.81642671  | 0.00000000  |
| H | -1.07369805 | 2.68384425  | 0.00000000  |
| H | -2.34904866 | -1.16492691 | 0.00000000  |
| H | -1.20936300 | 5.78522070  | 0.00000000  |
| H | -3.59824674 | 5.48208378  | 0.00000000  |
| H | 5.50373391  | -4.13666402 | 0.00000000  |
| C | -5.00664696 | -1.66856263 | 0.00000000  |
| C | -3.97753951 | -2.57236377 | 0.00000000  |
| H | -4.23510553 | -3.63018710 | 0.00000000  |
| C | -6.45555979 | -2.09920476 | 0.00000000  |
| H | -6.97992740 | -1.71089433 | 0.88045545  |
| H | -6.97992740 | -1.71089433 | -0.88045545 |
| H | -6.53929134 | -3.18894828 | 0.00000000  |

**Table S46.** Cartesian coordinate of optimized structure of type (i) reference compound for Me-**3D24A**(R=H) ( $C_s$ ) at the B3LYP/6-31G(d,p) level

|   |             |             |             |
|---|-------------|-------------|-------------|
| C | 4.88246500  | 2.98903000  | 0.00000000  |
| C | 5.23449100  | 1.68613600  | 0.00000000  |
| C | 5.58983900  | 0.48494900  | 0.00000000  |
| C | 5.96539900  | -0.81246200 | 0.00000000  |
| C | 3.54971900  | 3.51649100  | 0.00000000  |
| C | 5.07767000  | -1.93576500 | 0.00000000  |
| C | 2.39054800  | 2.79032300  | 0.00000000  |
| C | 3.71019000  | -1.85949300 | 0.00000000  |
| C | 2.81950000  | -2.96742600 | 0.00000000  |
| C | 1.08187600  | 3.36267000  | 0.00000000  |
| C | 1.45822000  | -2.81626700 | 0.00000000  |
| C | -0.07114400 | 2.63540500  | 0.00000000  |
| C | -1.39705000 | 3.19691700  | 0.00000000  |
| C | 0.49281600  | -3.86375800 | 0.00000000  |
| C | -0.85194600 | -3.61587500 | 0.00000000  |
| C | -2.52603800 | 2.45729700  | 0.00000000  |
| C | -1.88048900 | -4.60386900 | 0.00000000  |
| C | -3.22268800 | -4.31981900 | 0.00000000  |
| C | -5.07930000 | 2.02959400  | 0.00000000  |
| C | -4.79296200 | 0.64029400  | 0.00000000  |
| C | -3.73427400 | -3.01369100 | 0.00000000  |
| C | -4.12512400 | -1.85071400 | 0.00000000  |
| C | -4.49302800 | -0.54731100 | 0.00000000  |
| H | 7.03333900  | -1.02620600 | 0.00000000  |
| H | 3.47370100  | 4.60245000  | 0.00000000  |
| H | 5.54556800  | -2.91853200 | 0.00000000  |
| H | 2.46030300  | 1.70314800  | 0.00000000  |
| H | 3.25876400  | -0.86816400 | 0.00000000  |
| H | 3.24465000  | -3.97117100 | 0.00000000  |
| H | 1.01314000  | 4.45095000  | 0.00000000  |
| H | 1.06472500  | -1.79953200 | 0.00000000  |
| H | 0.00000000  | 1.54749900  | 0.00000000  |
| H | -1.46803500 | 4.28592900  | 0.00000000  |
| H | 0.85013700  | -4.89365600 | 0.00000000  |
| H | -1.17879000 | -2.57766300 | 0.00000000  |
| H | -2.44041100 | 1.37319300  | 0.00000000  |
| H | -1.58406500 | -5.65089400 | 0.00000000  |
| H | -3.93729200 | -5.13983800 | 0.00000000  |
| H | 5.69205500  | 3.71838200  | 0.00000000  |
| C | -3.91745800 | 3.03445500  | 0.00000000  |
| H | -4.04413200 | 3.68820400  | 0.87371200  |
| H | -4.04413200 | 3.68820400  | -0.87371200 |
| C | -6.35544400 | 2.46427900  | 0.00000000  |
| H | -7.19024400 | 1.77326200  | 0.00000000  |
| H | -6.58401100 | 3.52609000  | 0.00000000  |

**Table S47.** Cartesian coordinate of optimized structure of **3D24A**(R=H) ( $C_{2v}$ ) at the B3LYP/6-31G(d,p) level

|   |             |             |            |
|---|-------------|-------------|------------|
| C | -0.00000000 | 1.97381105  | 5.26580185 |
| C | -0.00000000 | 0.62780148  | 5.24892776 |
| C | -0.00000000 | -0.62780148 | 5.24892776 |
| C | -0.00000000 | -1.97381105 | 5.26580185 |

|   |            |             |             |
|---|------------|-------------|-------------|
| C | -0.0000000 | 2.83804253  | 4.11496229  |
| C | -0.0000000 | -2.83804253 | 4.11496229  |
| C | -0.0000000 | 2.42825884  | 2.81315720  |
| C | -0.0000000 | -2.42825884 | 2.81315720  |
| C | -0.0000000 | -3.29717717 | 1.67765125  |
| C | -0.0000000 | 3.29717717  | 1.67765125  |
| C | 0.0000000  | -2.83860857 | 0.39267157  |
| C | -0.0000000 | 2.83860857  | 0.39267157  |
| C | 0.0000000  | 3.64775673  | -0.79006320 |
| C | 0.0000000  | -3.64775673 | -0.79006320 |
| C | 0.0000000  | -3.11261225 | -2.04290295 |
| C | 0.0000000  | 3.11261225  | -2.04290295 |
| C | 0.0000000  | -3.85875740 | -3.26825740 |
| C | 0.0000000  | -3.29199156 | -4.51247418 |
| C | 0.0000000  | 1.89978517  | -4.72326383 |
| C | 0.0000000  | -1.89978517 | -4.72326383 |
| C | 0.0000000  | -0.67806741 | -4.82211962 |
| C | 0.0000000  | 0.67806741  | -4.82211962 |
| H | -0.0000000 | -2.46008384 | 6.24075732  |
| H | -0.0000000 | 3.90626876  | 4.32383698  |
| H | -0.0000000 | -3.90626876 | 4.32383698  |
| H | -0.0000000 | 1.35747122  | 2.61280683  |
| H | -0.0000000 | -1.35747122 | 2.61280683  |
| H | -0.0000000 | -4.37202065 | 1.85927247  |
| H | -0.0000000 | 4.37202065  | 1.85927247  |
| H | 0.0000000  | -1.75954450 | 0.23715775  |
| H | -0.0000000 | 1.75954450  | 0.23715775  |
| H | -0.0000000 | 4.73087803  | -0.66688963 |
| H | 0.0000000  | -4.73087803 | -0.66688963 |
| H | 0.0000000  | -2.02857575 | -2.13898924 |
| H | 0.0000000  | 2.02857575  | -2.13898924 |
| H | 0.0000000  | -4.94488896 | -3.20325148 |
| H | 0.0000000  | -3.93559163 | -5.38924540 |
| H | -0.0000000 | 2.46008384  | 6.24075732  |
| C | 0.0000000  | 3.29199156  | -4.51247418 |
| H | 0.0000000  | 3.93559163  | -5.38924540 |
| C | 0.0000000  | 3.85875740  | -3.26825740 |
| H | 0.0000000  | 4.94488896  | -3.20325148 |

**Table S48.** Cartesian coordinate of optimized structure of type (ii) reference compound for **3D24A**(R=H) ( $C_{2v}$ ) at the B3LYP/6-31G(d,p) level

|   |           |              |             |
|---|-----------|--------------|-------------|
| C | 0.0000000 | 1.97393700   | 2.45864200  |
| C | 0.0000000 | 0.62695700   | 2.44990900  |
| C | 0.0000000 | -0.62695700  | 2.44990900  |
| C | 0.0000000 | -1.97393700  | 2.45864200  |
| C | 0.0000000 | 2.78931100   | 1.28741100  |
| C | 0.0000000 | -2.78931100  | 1.28741100  |
| C | 0.0000000 | 4.15749300   | 1.31145700  |
| C | 0.0000000 | -4.15749300  | 1.31145700  |
| C | 0.0000000 | -4.97993700  | 0.14602600  |
| C | 0.0000000 | 4.97993700   | 0.14602600  |
| C | 0.0000000 | -6.34603900  | 0.16410900  |
| C | 0.0000000 | 6.34603900   | 0.16410900  |
| C | 0.0000000 | 7.16555200   | -1.00757300 |
| C | 0.0000000 | -7.16555200  | -1.00757300 |
| C | 0.0000000 | -8.52858400  | -0.99493400 |
| C | 0.0000000 | 8.52858400   | -0.99493400 |
| C | 0.0000000 | 9.33335400   | -2.18229400 |
| C | 0.0000000 | -9.33335400  | -2.18229400 |
| C | 0.0000000 | -10.69451700 | -2.21749300 |
| C | 0.0000000 | 10.69451700  | -2.21749300 |
| C | 0.0000000 | 11.53669300  | -1.07853800 |
| C | 0.0000000 | -11.53669300 | -1.07853800 |
| H | 0.0000000 | 2.48115200   | 3.42420500  |
| H | 0.0000000 | -2.48115200  | 3.42420500  |
| H | 0.0000000 | 2.27858000   | 0.32616400  |
| H | 0.0000000 | -2.27858000  | 0.32616400  |
| H | 0.0000000 | 4.66064000   | 2.27849000  |
| H | 0.0000000 | -4.66064000  | 2.27849000  |
| H | 0.0000000 | -4.47311200  | -0.81930900 |

|   |           |              |             |
|---|-----------|--------------|-------------|
| H | 0.0000000 | 4.47311200   | -0.81930900 |
| H | 0.0000000 | -6.85577700  | 1.12753700  |
| H | 0.0000000 | 6.85577700   | 1.12753700  |
| H | 0.0000000 | 6.65251400   | -1.96993700 |
| H | 0.0000000 | -6.65251400  | -1.96993700 |
| H | 0.0000000 | -9.05191800  | -0.04043500 |
| H | 0.0000000 | 9.05191800   | -0.04043500 |
| H | 0.0000000 | 8.80786700   | -3.13550400 |
| H | 0.0000000 | -8.80786700  | -3.13550400 |
| H | 0.0000000 | -11.19234600 | -3.18462200 |
| H | 0.0000000 | 11.19234600  | -3.18462200 |
| C | 0.0000000 | 12.28559600  | -0.12401800 |
| H | 0.0000000 | 12.93905400  | 0.71718700  |
| C | 0.0000000 | -12.28559600 | -0.12401800 |
| H | 0.0000000 | -12.93905400 | 0.71718700  |

**Table S49.** Cartesian coordinate of optimized structure of **3D24**(R=*t*-Bu) ( $D_{4h}$ ) at the B3LYP/6-31G(d,p) level

|   |             |             |             |
|---|-------------|-------------|-------------|
| C | -0.0000000  | 1.98406874  | 5.10592477  |
| C | -0.0000000  | 0.62731548  | 5.07423402  |
| C | -0.0000000  | -0.62731548 | 5.07423402  |
| C | -0.0000000  | -1.98406874 | 5.10592477  |
| C | -0.0000000  | 2.75920939  | 3.88984216  |
| C | -0.0000000  | -2.75920939 | 3.88984216  |
| C | -0.0000000  | 2.28233972  | 2.60826478  |
| C | -0.0000000  | -2.28233972 | 2.60826478  |
| C | -0.0000000  | -3.12439797 | 1.45419574  |
| C | -0.0000000  | 3.12439797  | 1.45419574  |
| C | -0.0000000  | -2.66674246 | 0.16802410  |
| C | 0.0000000   | 2.66674246  | 0.16802410  |
| C | 0.0000000   | 3.49612618  | -1.00008063 |
| C | -0.0000000  | -3.49612618 | -1.00008063 |
| C | 0.0000000   | -3.00088728 | -2.26969704 |
| C | 0.0000000   | 3.00088728  | -2.26969704 |
| C | 0.0000000   | -3.80246230 | -3.46174594 |
| C | 0.0000000   | -3.30739797 | -4.73943130 |
| C | 0.0000000   | 1.90008692  | -4.92495827 |
| C | 0.0000000   | -1.90008692 | -4.92495827 |
| C | 0.0000000   | -0.67904631 | -5.02227655 |
| C | 0.0000000   | 0.67904631  | -5.02227655 |
| H | -0.0000000  | 3.83837688  | 4.00332997  |
| H | -0.0000000  | -3.83837688 | 4.00332997  |
| H | -0.0000000  | 1.20620069  | 2.44377371  |
| H | -0.0000000  | -1.20620069 | 2.44377371  |
| H | -0.0000000  | -4.20179753 | 1.62355158  |
| H | 0.0000000   | 4.20179753  | 1.62355158  |
| H | -0.0000000  | -1.58915288 | 0.00280212  |
| H | 0.0000000   | 1.58915288  | 0.00280212  |
| H | 0.0000000   | 4.57613296  | -0.84907159 |
| H | -0.0000000  | -4.57613296 | -0.84907159 |
| H | 0.0000000   | -1.92119157 | -2.40145419 |
| H | 0.0000000   | 1.92119157  | -2.40145419 |
| H | 0.0000000   | -4.87957636 | -3.32337075 |
| C | 0.0000000   | 3.30739797  | -4.73943130 |
| C | 0.0000000   | 3.80246230  | -3.46174594 |
| H | 0.0000000   | 4.87957636  | -3.32337075 |
| C | -0.0000000  | -2.68032293 | 6.49522453  |
| C | -0.0000000  | 2.68032293  | 6.49522453  |
| C | 0.0000000   | 4.17687144  | -6.01007234 |
| C | 0.0000000   | -4.17687144 | -6.01007234 |
| C | -1.26125503 | 2.24863832  | 7.27723140  |
| H | -1.29310294 | 1.16378694  | 7.40631165  |
| H | -1.27155289 | 2.71077983  | 8.27081423  |
| H | -2.17252890 | 2.55158662  | 6.75136119  |
| C | 1.26125503  | 2.24863832  | 7.27723140  |
| H | 1.27155289  | 2.71077983  | 8.27081423  |
| H | 1.29310294  | 1.16378694  | 7.40631165  |
| H | 2.17252890  | 2.55158662  | 6.75136119  |
| C | -0.0000000  | 4.21723763  | 6.39305628  |
| H | 0.88811119  | 4.59638819  | 5.87725182  |
| H | -0.88811119 | 4.59638819  | 5.87725182  |
| H | -0.0000000  | 4.64476700  | 7.40086906  |

|   |             |             |             |
|---|-------------|-------------|-------------|
| C | -1.26125503 | -2.24863832 | 7.27723140  |
| H | -1.27155289 | -2.71077983 | 8.27081423  |
| H | -1.29310294 | -1.16378694 | 7.40631165  |
| H | -2.17252890 | -2.55158662 | 6.75136119  |
| C | 1.26125503  | -2.24863832 | 7.27723140  |
| H | 1.29310294  | -1.16378694 | 7.40631165  |
| H | 1.27155289  | -2.71077983 | 8.27081423  |
| H | 2.17252890  | -2.55158662 | 6.75136119  |
| C | -0.00000000 | -4.21723763 | 6.39305628  |
| H | -0.88811119 | -4.59638819 | 5.87725182  |
| H | 0.88811119  | -4.59638819 | 5.87725182  |
| H | -0.00000000 | -4.64476700 | 7.40086906  |
| C | -1.26070437 | -3.84393904 | -6.84196644 |
| H | -1.29525765 | -2.78170506 | -7.09999470 |
| H | -1.26427714 | -4.42143974 | -7.77295692 |
| H | -2.17228262 | -4.08659731 | -6.28628546 |
| C | 1.26070437  | -3.84393904 | -6.84196644 |
| H | 1.26427714  | -4.42143974 | -7.77295692 |
| H | 1.29525765  | -2.78170506 | -7.09999470 |
| H | 2.17228262  | -4.08659731 | -6.28628546 |
| C | 0.00000000  | -5.68029432 | -5.68714674 |
| H | 0.88792498  | -5.97553660 | -5.11854216 |
| H | -0.88792498 | -5.97553660 | -5.11854216 |
| H | 0.00000000  | -6.25356230 | -6.61967416 |
| C | 0.00000000  | 5.68029432  | -5.68714674 |
| H | -0.88792498 | 5.97553660  | -5.11854216 |
| H | 0.88792498  | 5.97553660  | -5.11854216 |
| H | 0.00000000  | 6.25356230  | -6.61967416 |
| C | -1.26070437 | 3.84393904  | -6.84196644 |
| H | -1.26427714 | 4.42143974  | -7.77295692 |
| H | -1.29525765 | 2.78170506  | -7.09999470 |
| H | -2.17228262 | 4.08659731  | -6.28628546 |
| C | 1.26070437  | 3.84393904  | -6.84196644 |
| H | 2.17228262  | 4.08659731  | -6.28628546 |
| H | 1.29525765  | 2.78170506  | -7.09999470 |
| H | 1.26427714  | 4.42143974  | -7.77295692 |

**Table S50.** Cartesian coordinate of optimized structure of Me-1(R=H) ( $C_s$ ) at the B3LYP/6-31G(d,p) level

|   |             |             |            |
|---|-------------|-------------|------------|
| C | -3.64811067 | 1.53674433  | 0.00000000 |
| C | -4.09273228 | 2.87881685  | 0.00000000 |
| C | -2.95662661 | 3.69976097  | 0.00000000 |
| C | -1.81225688 | 2.86443429  | 0.00000000 |
| N | -2.27443977 | 1.59006409  | 0.00000000 |
| H | -1.77619191 | 0.68952929  | 0.00000000 |
| H | -5.12460517 | 3.20247537  | 0.00000000 |
| H | -2.95159090 | 4.78004726  | 0.00000000 |
| C | -0.36836849 | 3.14314959  | 0.00000000 |
| C | -4.31496654 | 0.27892225  | 0.00000000 |
| H | -5.40140606 | 0.29319826  | 0.00000000 |
| C | 0.46531520  | 2.06916914  | 0.00000000 |
| H | 0.00000000  | 1.09138247  | 0.00000000 |
| C | -3.66378705 | -0.94995126 | 0.00000000 |
| C | -4.18620537 | -2.30345313 | 0.00000000 |
| N | -2.27864471 | -1.01240543 | 0.00000000 |
| C | -3.10272862 | -3.14540101 | 0.00000000 |
| H | -5.23261177 | -2.58190700 | 0.00000000 |
| C | -1.92423160 | -2.29522345 | 0.00000000 |
| H | -3.11271278 | -4.22729638 | 0.00000000 |
| C | 1.90004258  | 1.85802759  | 0.00000000 |
| C | 3.08172093  | 2.70715552  | 0.00000000 |
| N | 2.25720309  | 0.57449108  | 0.00000000 |
| C | 4.16500591  | 1.86496918  | 0.00000000 |
| H | 3.09503145  | 3.78851073  | 0.00000000 |
| C | 3.64263872  | 0.51231916  | 0.00000000 |
| H | 5.21149778  | 2.14319132  | 0.00000000 |
| C | -0.48833423 | -2.49937220 | 0.00000000 |
| H | -0.03112129 | -1.51600975 | 0.00000000 |
| C | 0.36461150  | -3.55142309 | 0.00000000 |
| H | 0.03345583  | -4.58578444 | 0.00000000 |
| C | 1.80149741  | -3.29309229 | 0.00000000 |
| C | 2.93886481  | -4.13561807 | 0.00000000 |
| N | 2.26615108  | -2.02116708 | 0.00000000 |

|   |             |             |             |
|---|-------------|-------------|-------------|
| C | 4.07892514  | -3.31924261 | 0.00000000  |
| H | 2.91694834  | -5.21646942 | 0.00000000  |
| C | 3.63942078  | -1.97387062 | 0.00000000  |
| H | 1.77016836  | -1.11748857 | 0.00000000  |
| H | 5.10960498  | -3.64665655 | 0.00000000  |
| C | 4.30132637  | -0.71361704 | 0.00000000  |
| H | 5.38777778  | -0.72042826 | 0.00000000  |
| C | 0.10963940  | 4.57561503  | 0.00000000  |
| H | 0.72451020  | 4.78413790  | 0.88228366  |
| H | 0.72451020  | 4.78413790  | -0.88228366 |
| H | -0.71911553 | 5.28563659  | 0.00000000  |

**Table S51.** Cartesian coordinate of optimized structure of type (i) reference compound for Me-1(R=H) ( $C_s$ ) at the B3LYP/6-31G(d,p) level

|   |             |             |             |
|---|-------------|-------------|-------------|
| C | -3.65831402 | -1.60043724 | 0.00000000  |
| C | -4.12571031 | -2.93683574 | 0.00000000  |
| C | -3.00920754 | -3.77806158 | 0.00000000  |
| C | -1.85054040 | -2.96461727 | 0.00000000  |
| N | -2.28318363 | -1.67886162 | 0.00000000  |
| H | -1.76638396 | -0.78723213 | 0.00000000  |
| H | -5.16383018 | -3.24001403 | 0.00000000  |
| H | -3.01925360 | -4.85853340 | 0.00000000  |
| C | -0.40354978 | -3.25380350 | 0.00000000  |
| C | -4.30546736 | -0.33755381 | 0.00000000  |
| H | -5.39189881 | -0.33665508 | 0.00000000  |
| C | -3.63768235 | 0.88405502  | 0.00000000  |
| C | -4.16070325 | 2.23856459  | 0.00000000  |
| N | -2.25682666 | 0.93893281  | 0.00000000  |
| C | -3.07799410 | 3.07864774  | 0.00000000  |
| H | -5.20747676 | 2.51584820  | 0.00000000  |
| C | -1.90017319 | 2.22755548  | 0.00000000  |
| H | -3.08579079 | 4.16060907  | 0.00000000  |
| C | 1.92546609  | -1.81064119 | 0.00000000  |
| C | 3.09683780  | -2.66340464 | 0.00000000  |
| N | 2.28062909  | -0.53948691 | 0.00000000  |
| C | 4.18810473  | -1.82413410 | 0.00000000  |
| H | 3.11608088  | -3.74425365 | 0.00000000  |
| C | 3.67190519  | -0.47293990 | 0.00000000  |
| H | 5.23246180  | -2.10942040 | 0.00000000  |
| C | -0.47676859 | 2.44944872  | 0.00000000  |
| H | 0.00000000  | 1.47539352  | 0.00000000  |
| C | 0.35668866  | 3.52391636  | 0.00000000  |
| H | -0.00017209 | 4.54968253  | 0.00000000  |
| C | 1.79076855  | 3.29778740  | 0.00000000  |
| C | 2.91812267  | 4.15975160  | 0.00000000  |
| N | 2.27913973  | 2.03458427  | 0.00000000  |
| C | 4.06875837  | 3.36289779  | 0.00000000  |
| H | 2.87959908  | 5.24023143  | 0.00000000  |
| C | 3.65029476  | 2.00806251  | 0.00000000  |
| H | 1.79996137  | 1.11897871  | 0.00000000  |
| H | 5.09400047  | 3.70715236  | 0.00000000  |
| C | 4.32500434  | 0.75440118  | 0.00000000  |
| H | 5.41128929  | 0.76786590  | 0.00000000  |
| C | 0.41844419  | -1.98041918 | 0.00000000  |
| H | 0.08532619  | -1.39157749 | 0.86481269  |
| H | 0.08532619  | -1.39157749 | -0.86481269 |
| C | 0.07117805  | -4.50868453 | 0.00000000  |
| H | 1.13317415  | -4.71739469 | 0.00000000  |
| H | -0.59349803 | -5.36661742 | 0.00000000  |

**Table S52.** Cartesian coordinate of optimized structure of 1(R=H) ( $C_{2h}$ ) at the B3LYP/6-31G(d,p) level

|   |            |            |            |
|---|------------|------------|------------|
| C | 3.68546313 | 1.67401518 | 0.00000000 |
| C | 4.15215731 | 3.01044789 | 0.00000000 |
| C | 3.02951008 | 3.84999467 | 0.00000000 |
| C | 1.87458242 | 3.03122209 | 0.00000000 |
| N | 2.31288717 | 1.75009420 | 0.00000000 |
| H | 1.79762122 | 0.85819750 | 0.00000000 |
| H | 5.18932602 | 3.31664423 | 0.00000000 |
| H | 3.03011018 | 4.93104302 | 0.00000000 |
| C | 0.44364967 | 3.32146892 | 0.00000000 |

|   |             |             |            |
|---|-------------|-------------|------------|
| H | 0.13639575  | 4.36324922  | 0.00000000 |
| C | 4.32440090  | 0.40224571  | 0.00000000 |
| H | 5.41084266  | 0.39059601  | 0.00000000 |
| C | -0.43376500 | 2.28980980  | 0.00000000 |
| H | 0.00081820  | 1.29592042  | 0.00000000 |
| C | 3.64444880  | -0.81243479 | 0.00000000 |
| C | 4.13558477  | -2.17727295 | 0.00000000 |
| N | 2.25840037  | -0.84471301 | 0.00000000 |
| C | 3.03342878  | -2.99527169 | 0.00000000 |
| H | 5.17538477  | -2.47934758 | 0.00000000 |
| C | 1.87458242  | -2.11941032 | 0.00000000 |
| H | 3.01969507  | -4.07711740 | 0.00000000 |
| C | -1.87458242 | 2.11941032  | 0.00000000 |
| C | -3.03342878 | 2.99527169  | 0.00000000 |
| N | -2.25840037 | 0.84471301  | 0.00000000 |
| C | -4.13558477 | 2.17727295  | 0.00000000 |
| H | -3.01969507 | 4.07711740  | 0.00000000 |
| C | -3.64444880 | 0.81243479  | 0.00000000 |
| H | -5.17538477 | 2.47934758  | 0.00000000 |
| C | 0.43376500  | -2.28980980 | 0.00000000 |
| H | -0.00081820 | -1.29592042 | 0.00000000 |
| C | -0.44364967 | -3.32146892 | 0.00000000 |
| H | -0.13639575 | -4.36324922 | 0.00000000 |
| C | -1.87458242 | -3.03122209 | 0.00000000 |
| C | -3.02951008 | -3.84999467 | 0.00000000 |
| N | -2.31288717 | -1.75009420 | 0.00000000 |
| C | -4.15215731 | -3.01044789 | 0.00000000 |
| H | -3.03011018 | -4.93104302 | 0.00000000 |
| C | -3.68546313 | -1.67401518 | 0.00000000 |
| H | -1.79762122 | -0.85819750 | 0.00000000 |
| H | -5.18932602 | -3.31664423 | 0.00000000 |
| C | -4.32440090 | -0.40224571 | 0.00000000 |
| H | -5.41084266 | -0.39059601 | 0.00000000 |

**Table S53.** Cartesian coordinate of optimized structure of type (ii) reference compound for **1** ( $C_{2s}$ ) at the B3LYP/6-31G(d,p)

level

|   |             |             |            |
|---|-------------|-------------|------------|
| C | -1.79871400 | -3.38076100 | 0.00000000 |
| C | -0.48240500 | -3.89295800 | 0.00000000 |
| C | 0.39466400  | -2.81177600 | 0.00000000 |
| C | -0.37912700 | -1.62707400 | 0.00000000 |
| N | -1.69065800 | -2.00849700 | 0.00000000 |
| H | -2.53992400 | -1.43830100 | 0.00000000 |
| H | -0.22453200 | -4.94315200 | 0.00000000 |
| H | 1.47420700  | -2.85165800 | 0.00000000 |
| C | 0.00000000  | -0.24242400 | 0.00000000 |
| H | -0.82111600 | 0.47151900  | 0.00000000 |
| C | -3.04439000 | -4.05195000 | 0.00000000 |
| H | -3.00536600 | -5.13773500 | 0.00000000 |
| C | 1.27699800  | 0.22040300  | 0.00000000 |
| H | 2.10695200  | -0.48187300 | 0.00000000 |
| C | -4.28459000 | -3.44910900 | 0.00000000 |
| C | -5.57739700 | -4.10583500 | 0.00000000 |
| N | -4.45631300 | -2.06453800 | 0.00000000 |
| C | -6.51047300 | -3.11274500 | 0.00000000 |
| H | -5.74233700 | -5.17584800 | 0.00000000 |
| C | -5.76838800 | -1.85771700 | 0.00000000 |
| H | -7.58687200 | -3.21873200 | 0.00000000 |
| C | 1.66016000  | 1.60792300  | 0.00000000 |
| C | 0.78803900  | 2.77861000  | 0.00000000 |
| N | 2.94639800  | 1.95811000  | 0.00000000 |
| C | 1.60982200  | 3.86401800  | 0.00000000 |
| H | -0.29367500 | 2.77290000  | 0.00000000 |
| C | 2.96686000  | 3.34915900  | 0.00000000 |
| H | 1.33118700  | 4.91024600  | 0.00000000 |
| C | -6.30766000 | -0.50789400 | 0.00000000 |
| H | -5.55526000 | 0.27788000  | 0.00000000 |
| C | 7.69052700  | 3.21982900  | 0.00000000 |
| N | 5.70373200  | 2.20156200  | 0.00000000 |
| C | 6.69525800  | 4.21035600  | 0.00000000 |
| H | 8.76067600  | 3.36837900  | 0.00000000 |



|   |             |             |            |
|---|-------------|-------------|------------|
| C | 5.44802300  | 3.56093600  | 0.00000000 |
| H | 4.92240000  | 1.54290500  | 0.00000000 |
| H | 6.83923100  | 5.28200300  | 0.00000000 |
| C | 4.13237300  | 4.08671200  | 0.00000000 |
| H | 4.04777800  | 5.16998400  | 0.00000000 |
| C | -7.60954200 | -0.18481200 | 0.00000000 |
| H | -7.93232800 | 0.85083100  | 0.00000000 |
| H | -8.39220200 | -0.93754600 | 0.00000000 |
| C | 7.04013400  | 1.98498000  | 0.00000000 |
| H | 7.44803200  | 0.98451600  | 0.00000000 |

**Table S54.** Cartesian coordinate of optimized structure of **1**(R=Mes) ( $C_{2h}$ ) at the B3LYP/6-31G(d,p) level

|   |             |             |             |
|---|-------------|-------------|-------------|
| C | 1.68364214  | -3.68614368 | 0.00000000  |
| C | 3.02529035  | -4.14043318 | 0.00000000  |
| C | 3.85419817  | -3.00998626 | 0.00000000  |
| C | 3.02471822  | -1.86314253 | 0.00000000  |
| N | 1.74755425  | -2.31269475 | 0.00000000  |
| H | 0.84796484  | -1.80728191 | 0.00000000  |
| H | 3.33658973  | -5.17535837 | 0.00000000  |
| H | 4.93527926  | -3.00057784 | 0.00000000  |
| C | 3.30407157  | -0.43044132 | 0.00000000  |
| H | 4.34384874  | -0.11649742 | 0.00000000  |
| C | 0.41760624  | -4.35886471 | 0.00000000  |
| C | 2.26821347  | 0.44245492  | 0.00000000  |
| H | 1.27605687  | 0.00388799  | 0.00000000  |
| C | -0.79654510 | -3.65774917 | 0.00000000  |
| C | -2.16364520 | -4.14329848 | 0.00000000  |
| N | -0.82519327 | -2.27228489 | 0.00000000  |
| C | -2.97766125 | -3.03690101 | 0.00000000  |
| H | -2.46688208 | -5.18187220 | 0.00000000  |
| C | -2.09921370 | -1.88277561 | 0.00000000  |
| H | -4.05953572 | -3.01999394 | 0.00000000  |
| C | 2.09921370  | 1.88277561  | 0.00000000  |
| C | 2.97766125  | 3.03690101  | 0.00000000  |
| N | 0.82519327  | 2.27228489  | 0.00000000  |
| C | 2.16364520  | 4.14329848  | 0.00000000  |
| H | 4.05953572  | 3.01999394  | 0.00000000  |
| C | 0.79654510  | 3.65774917  | 0.00000000  |
| H | 2.46688208  | 5.18187220  | 0.00000000  |
| C | -2.26821347 | -0.44245492 | 0.00000000  |
| H | -1.27605687 | -0.00388799 | 0.00000000  |
| C | -3.30407157 | 0.43044132  | 0.00000000  |
| H | -4.34384874 | 0.11649742  | 0.00000000  |
| C | -3.02471822 | 1.86314253  | 0.00000000  |
| C | -3.85419817 | 3.00998626  | 0.00000000  |
| N | -1.74755425 | 2.31269475  | 0.00000000  |
| C | -3.02529035 | 4.14043318  | 0.00000000  |
| H | -4.93527926 | 3.00057784  | 0.00000000  |
| C | -1.68364214 | 3.68614368  | 0.00000000  |
| H | -0.84796484 | 1.80728191  | 0.00000000  |
| H | -3.33658973 | 5.17535837  | 0.00000000  |
| C | -0.41760624 | 4.35886471  | 0.00000000  |
| C | -0.41741489 | 5.85711974  | 0.00000000  |
| C | -0.41744509 | 6.55955725  | 1.22319199  |
| C | -0.41744509 | 6.55955725  | -1.22319199 |
| C | -0.41744509 | 7.95774636  | 1.19808220  |
| C | -0.41744509 | 7.95774636  | -1.19808220 |
| C | -0.42064981 | 8.67676637  | 0.00000000  |
| H | -0.41333723 | 8.49764966  | 2.14241389  |
| H | -0.41333723 | 8.49764966  | -2.14241389 |
| C | 0.41741489  | -5.85711974 | 0.00000000  |
| C | 0.41744509  | -6.55955725 | -1.22319199 |
| C | 0.41744509  | -6.55955725 | 1.22319199  |
| C | 0.41744509  | -7.95774636 | -1.19808220 |
| C | 0.41744509  | -7.95774636 | 1.19808220  |
| C | 0.42064981  | -8.67676637 | 0.00000000  |
| H | 0.41333723  | -8.49764966 | -2.14241389 |
| H | 0.41333723  | -8.49764966 | 2.14241389  |
| C | -0.41016381 | 5.82825974  | 2.54642743  |

|   |             |              |             |
|---|-------------|--------------|-------------|
| H | -1.27778950 | 5.16703479   | 2.64330289  |
| H | 0.48034380  | 5.19972430   | 2.65190580  |
| H | -0.42763411 | 6.53362597   | 3.38110232  |
| C | -0.41016381 | 5.82825974   | -2.54642743 |
| H | 0.48034380  | 5.19972430   | -2.65190580 |
| H | -1.27778950 | 5.16703479   | -2.64330289 |
| H | -0.42763411 | 6.53362597   | -3.38110232 |
| C | -0.45418730 | 10.18690208  | 0.00000000  |
| H | 0.03916791  | 10.59841010  | -0.88560007 |
| H | -1.48596166 | 10.56026584  | 0.00000000  |
| H | 0.03916791  | 10.59841010  | 0.88560007  |
| C | 0.41016381  | -5.82825974  | 2.54642743  |
| H | 1.27778950  | -5.16703479  | 2.64330289  |
| H | -0.48034380 | -5.19972430  | 2.65190580  |
| H | 0.42763411  | -6.53362597  | 3.38110232  |
| C | 0.41016381  | -5.82825974  | -2.54642743 |
| H | -0.48034380 | -5.19972430  | -2.65190580 |
| H | 1.27778950  | -5.16703479  | -2.64330289 |
| H | 0.42763411  | -6.53362597  | -3.38110232 |
| C | 0.45418730  | -10.18690208 | 0.00000000  |
| H | -0.03916791 | -10.59841010 | -0.88560007 |
| H | 1.48596166  | -10.56026584 | 0.00000000  |
| H | -0.03916791 | -10.59841010 | 0.88560007  |

**Table S55.** Cartesian coordinate of optimized structure of Me-2 ( $C_s$ ) at the B3LYP/6-31G(d,p) level

|   |             |             |             |
|---|-------------|-------------|-------------|
| C | 0.00000000  | 0.43894883  | 0.00000000  |
| C | -1.10370988 | -0.31754412 | 0.00000000  |
| H | -2.16848529 | -0.11802919 | 0.00000000  |
| C | -0.22131503 | -1.61568596 | 0.00000000  |
| H | -0.43650930 | -2.67761783 | 0.00000000  |
| C | 0.89002434  | -0.87691320 | 0.00000000  |
| H | 1.95390832  | -1.08115685 | 0.00000000  |
| C | 0.32968955  | 1.88317407  | 0.00000000  |
| H | 0.92969474  | 2.15419007  | 0.87972946  |
| H | 0.92969474  | 2.15419007  | -0.87972946 |
| H | -0.57643706 | 2.49654600  | 0.00000000  |

**Table S56.** Cartesian coordinate of optimized structure of type (i) reference compound for Me-2 ( $C_s$ ) at the B3LYP/6-31G(d,p) level

|   |             |             |             |
|---|-------------|-------------|-------------|
| C | 0.00000000  | 0.55289851  | 0.00000000  |
| C | -0.21876279 | -1.48870014 | 0.00000000  |
| H | -0.34512991 | -2.56573454 | 0.00000000  |
| C | -1.07940924 | -0.44836554 | 0.00000000  |
| H | -2.16158280 | -0.36677398 | 0.00000000  |
| C | 1.02490147  | -0.60361455 | 0.00000000  |
| H | 1.65981478  | -0.66463806 | 0.89191337  |
| H | 1.65981478  | -0.66463806 | -0.89191337 |
| C | 0.09343906  | 1.88232891  | 0.00000000  |
| H | 1.05733409  | 2.38202578  | 0.00000000  |
| H | -0.79126185 | 2.51247572  | 0.00000000  |

**Table S57.** Cartesian coordinate of optimized structure of 2 ( $D_{2h}$ ) at the B3LYP/6-31G(d,p) level

|   |             |             |             |
|---|-------------|-------------|-------------|
| C | 0.00000000  | 0.67640822  | 0.77300144  |
| H | -0.00004315 | 1.43872444  | 1.52607105  |
| C | -0.00000000 | -0.67640822 | 0.77300144  |
| H | 0.00004315  | -1.43872444 | 1.52607105  |
| C | -0.00000000 | -0.67640822 | -0.77300144 |
| H | 0.00004315  | -1.43872444 | -1.52607105 |
| C | 0.00000000  | 0.67640822  | -0.77300144 |
| H | -0.00004315 | 1.43872444  | -1.52607105 |

**Table S58.** Cartesian coordinate of optimized structure of type (ii) reference compound for 2 at the B3LYP/6-31G(d,p) level

|   |             |            |            |
|---|-------------|------------|------------|
| C | 0.60177412  | 1.75079207 | 0.00000000 |
| H | -0.32541928 | 2.31841040 | 0.00000000 |
| H | 1.52392194  | 2.32236909 | 0.00000000 |

|   |             |             |            |
|---|-------------|-------------|------------|
| C | 0.60177412  | 0.41081168  | 0.00000000 |
| H | 1.55117110  | -0.12457459 | 0.00000000 |
| C | -0.60177412 | -0.41081168 | 0.00000000 |
| H | -1.55117110 | 0.12457459  | 0.00000000 |
| C | -0.60177412 | -1.75079207 | 0.00000000 |
| H | 0.32541928  | -2.31841040 | 0.00000000 |
| H | -1.52392194 | -2.32236909 | 0.00000000 |

**Table S59.** Cartesian coordinate of optimized structure of Me-3 ( $C_s$ ) at the B3LYP/6-31G(d,p) level

|   |             |             |             |
|---|-------------|-------------|-------------|
| C | -0.52474820 | 1.67618646  | 0.00000000  |
| C | -1.06695050 | 0.44848557  | 0.00000000  |
| C | 0.00000000  | -0.64541412 | 0.00000000  |
| C | 1.23674289  | -0.10271213 | 0.00000000  |
| H | -1.10823662 | 2.59056487  | 0.00000000  |
| H | -2.12728366 | 0.20031821  | 0.00000000  |
| H | 2.14124006  | -0.70213453 | 0.00000000  |
| B | 1.04766635  | 1.45246581  | 0.00000000  |
| H | 1.89489391  | 2.29233716  | 0.00000000  |
| C | -0.39379039 | -2.08588776 | 0.00000000  |
| H | -1.01112874 | -2.32015378 | 0.87788673  |
| H | -1.01112874 | -2.32015378 | -0.87788673 |
| H | 0.47578927  | -2.74705535 | 0.00000000  |

**Table S60.** Cartesian coordinate of optimized structure of type (i) reference compound for Me-3 ( $C_s$ ) at the B3LYP/6-31G(d,p) level

|   |             |             |             |
|---|-------------|-------------|-------------|
| C | 0.81960020  | 1.46919205  | 0.00000000  |
| C | 1.15083746  | 0.14634331  | 0.00000000  |
| C | -0.00000000 | -0.75562988 | 0.00000000  |
| H | 1.57605366  | 2.24867400  | 0.00000000  |
| H | 2.16639709  | -0.24921235 | 0.00000000  |
| B | -0.71827036 | 1.57632995  | 0.00000000  |
| H | -1.38089183 | 2.56915174  | 0.00000000  |
| C | -1.26666844 | 0.08956942  | 0.00000000  |
| H | -1.89886678 | -0.12641771 | 0.87284015  |
| H | -1.89886678 | -0.12641771 | -0.87284015 |
| C | 0.09046690  | -2.09476232 | 0.00000000  |
| H | 1.05385956  | -2.59771878 | 0.00000000  |
| H | -0.79174983 | -2.72798440 | 0.00000000  |

**Table S61.** Cartesian coordinate of optimized structure of 3 ( $C_{2v}$ ) at the B3LYP/6-31G(d,p) level

|   |             |             |             |
|---|-------------|-------------|-------------|
| C | 0.00000000  | 1.25523704  | 0.35073130  |
| C | 0.00000000  | 0.75936984  | -0.89915234 |
| C | -0.00000000 | -0.75936984 | -0.89915234 |
| C | -0.00000000 | -1.25523704 | 0.35073130  |
| H | 0.00000000  | 2.31584326  | 0.57587029  |
| H | 0.00000000  | 1.32883456  | -1.82632862 |
| H | -0.00000000 | -1.32883456 | -1.82632862 |
| H | -0.00000000 | -2.31584326 | 0.57587029  |
| B | -0.00000000 | 0.00000000  | 1.31492732  |
| H | 0.00000000  | 0.00000000  | 2.50733250  |

**Table S62.** Cartesian coordinate of optimized structure of type (ii) reference compound for 3 ( $C_s$ ) at the B3LYP/6-31G(d,p) level

|   |             |             |            |
|---|-------------|-------------|------------|
| C | 2.27449165  | -0.20909302 | 0.00000000 |
| H | 2.70183423  | 0.79065181  | 0.00000000 |
| H | 2.97391198  | -1.03869137 | 0.00000000 |
| C | 0.94565958  | -0.40264500 | 0.00000000 |
| H | 0.54581198  | -1.41237126 | 0.00000000 |
| C | 0.00000000  | 0.69868704  | 0.00000000 |
| H | 0.46582638  | 1.68713008  | 0.00000000 |
| C | -1.36084537 | 0.61324246  | 0.00000000 |
| H | -1.88315774 | 1.57052755  | 0.00000000 |
| B | -2.18331520 | -0.68117796 | 0.00000000 |

|   |             |             |            |
|---|-------------|-------------|------------|
| H | -3.37805895 | -0.63335765 | 0.00000000 |
| H | -1.66542709 | -1.75914825 | 0.00000000 |

**Table S63.** Cartesian coordinate of optimized structure of Me-4 ( $C_s$ ) at the B3LYP/6-31G(d,p) level

|   |             |             |             |
|---|-------------|-------------|-------------|
| C | 0.00000000  | 0.88268950  | 0.00000000  |
| C | -1.29603154 | 0.49819207  | 0.00000000  |
| C | -1.34530050 | -1.00937593 | 0.00000000  |
| C | -0.07386804 | -1.48358913 | 0.00000000  |
| H | -2.18126778 | 1.12664002  | 0.00000000  |
| H | 0.21876459  | -2.52618534 | 0.00000000  |
| C | 0.83185210  | -0.32292122 | 0.00000000  |
| C | 2.12956375  | 0.06150228  | 0.00000000  |
| H | 3.01341431  | -0.56717980 | 0.00000000  |
| C | 2.16744350  | 1.56041674  | 0.00000000  |
| H | 3.08175986  | 2.14159751  | 0.00000000  |
| C | 0.90389553  | 2.04794947  | 0.00000000  |
| H | 0.60912571  | 3.08926299  | 0.00000000  |
| C | -2.62329364 | -1.78530556 | 0.00000000  |
| H | -3.23648424 | -1.54969124 | 0.87989295  |
| H | -3.23648424 | -1.54969124 | -0.87989295 |
| H | -2.43439520 | -2.86210222 | 0.00000000  |

**Table S64.** Cartesian coordinate of optimized structure of type (i) reference compound for Me-4 ( $C_s$ ) at the B3LYP/6-31G(d,p)

level

|   |             |             |             |
|---|-------------|-------------|-------------|
| C | 0.00000000  | -0.85705535 | 0.00000000  |
| C | -1.32469852 | -0.55558311 | 0.00000000  |
| C | -1.51845827 | 0.89489499  | 0.00000000  |
| H | -2.15511743 | -1.25503480 | 0.00000000  |
| C | 0.79330201  | 0.38483157  | 0.00000000  |
| C | 2.10441912  | 0.04543897  | 0.00000000  |
| H | 2.96801927  | 0.69955335  | 0.00000000  |
| C | 2.17394408  | -1.43017803 | 0.00000000  |
| H | 3.10355956  | -1.98944849 | 0.00000000  |
| C | 0.92122223  | -1.97589906 | 0.00000000  |
| H | 0.66572597  | -3.02667191 | 0.00000000  |
| C | -2.70401823 | 1.52352209  | 0.00000000  |
| H | -2.77758301 | 2.60659644  | 0.00000000  |
| C | -0.13548798 | 1.56621090  | 0.00000000  |
| H | -0.01418056 | 2.20993292  | 0.88021865  |
| H | -0.01418056 | 2.20993292  | -0.88021865 |
| H | -3.63758983 | 0.96804179  | 0.00000000  |

**Table S65.** Cartesian coordinate of optimized structure of 4 ( $C_{2h}$ ) at the B3LYP/6-31G(d,p) level

|   |             |             |            |
|---|-------------|-------------|------------|
| C | -0.03711848 | 0.72905015  | 0.00000000 |
| C | -1.34456843 | 1.08613248  | 0.00000000 |
| C | -2.16579128 | -0.16531305 | 0.00000000 |
| C | -1.34456843 | -1.24362850 | 0.00000000 |
| H | -1.76339422 | 2.08679176  | 0.00000000 |
| H | -3.24880475 | -0.17869783 | 0.00000000 |
| H | -1.64154996 | -2.28441970 | 0.00000000 |
| C | 0.03711848  | -0.72905015 | 0.00000000 |
| C | 1.34456843  | -1.08613248 | 0.00000000 |
| H | 1.76339422  | -2.08679176 | 0.00000000 |
| C | 2.16579128  | 0.16531305  | 0.00000000 |
| H | 3.24880475  | 0.17869783  | 0.00000000 |
| C | 1.34456843  | 1.24362850  | 0.00000000 |
| H | 1.64154996  | 2.28441970  | 0.00000000 |

**Table S66.** Cartesian coordinate of optimized structure of type (ii) reference compound for 4 at the B3LYP/6-31G(d,p) level

|   |             |             |             |
|---|-------------|-------------|-------------|
| C | 0.00000000  | 0.33893926  | 0.00000000  |
| C | 1.11491268  | -0.43949033 | 0.00000000  |
| C | 1.14397211  | -1.88557761 | 0.00000000  |
| H | 2.08426317  | 0.05896862  | 0.00000000  |
| H | 0.18942296  | -2.40665159 | -0.00000000 |
| C | -2.17230929 | 1.04581083  | 0.00000000  |

|   |             |             |             |
|---|-------------|-------------|-------------|
| H | -3.25534376 | 1.08587220  | 0.00000000  |
| C | -1.29349113 | 2.22546210  | -0.00000000 |
| H | -1.64039752 | 3.25193206  | -0.00000000 |
| C | -0.00337227 | 1.80772414  | 0.00000000  |
| H | 0.88986458  | 2.41960379  | -0.00000000 |
| C | -1.41050624 | -0.07694967 | 0.00000000  |
| H | -1.76353714 | -1.09933901 | 0.00000000  |
| C | 2.28184462  | -2.60062582 | 0.00000000  |
| H | 2.27434062  | -3.68537875 | 0.00000000  |
| H | 3.25508421  | -2.11676469 | -0.00000000 |

**Table S67.** Cartesian coordinate of optimized structure of Me-5 ( $C_s$ ) at the B3LYP/6-31G(d,p) level

|   |             |             |             |
|---|-------------|-------------|-------------|
| C | -1.04886551 | 0.01426328  | 0.00000000  |
| C | -0.73569981 | -1.32240389 | 0.00000000  |
| C | 0.64208527  | -1.69613935 | 0.00000000  |
| C | 1.68975738  | -0.68584118 | 0.00000000  |
| C | 1.37669279  | 0.65187392  | 0.00000000  |
| C | 0.00000000  | 1.02417626  | 0.00000000  |
| H | -1.50976377 | -2.08727190 | 0.00000000  |
| H | 2.15083184  | 1.41675360  | 0.00000000  |
| C | -2.31302621 | 0.72655262  | 0.00000000  |
| H | -3.29288760 | 0.26266838  | 0.00000000  |
| C | -2.06281388 | 2.08132413  | 0.00000000  |
| C | -0.62572084 | 2.26413556  | 0.00000000  |
| H | -0.12688860 | 3.22820868  | 0.00000000  |
| C | 2.95849563  | -1.39284112 | 0.00000000  |
| H | 3.93526758  | -0.92420266 | 0.00000000  |
| C | 2.69703441  | -2.74280050 | 0.00000000  |
| H | 3.43154542  | -3.53810006 | 0.00000000  |
| C | 1.26762357  | -2.93740229 | 0.00000000  |
| H | 0.76913615  | -3.90064828 | 0.00000000  |
| C | -3.06983707 | 3.19281371  | 0.00000000  |
| H | -2.96052671 | 3.83782329  | 0.88066291  |
| H | -2.96052671 | 3.83782329  | -0.88066291 |
| H | -4.09054190 | 2.80067881  | 0.00000000  |

**Table S68.** Cartesian coordinate of optimized structure of type (i) reference compound for Me-5 ( $C_s$ ) at the B3LYP/6-31G(d,p) level

|   |             |             |             |
|---|-------------|-------------|-------------|
| C | 1.08163750  | 0.05183348  | 0.00000000  |
| C | 0.81746588  | -1.27929779 | 0.00000000  |
| C | -0.55364809 | -1.71219182 | 0.00000000  |
| C | -1.64830793 | -0.71370010 | 0.00000000  |
| C | -1.38037180 | 0.62042294  | 0.00000000  |
| C | 0.00000000  | 1.03540263  | 0.00000000  |
| H | 1.61563969  | -2.01809539 | 0.00000000  |
| H | -2.17023696 | 1.36769080  | 0.00000000  |
| C | 1.97265158  | 2.27167971  | 0.00000000  |
| C | 0.52317659  | 2.30299377  | 0.00000000  |
| H | -0.05403254 | 3.22220967  | 0.00000000  |
| C | -2.90376927 | -1.45454479 | 0.00000000  |
| H | -3.89135499 | -1.01208828 | 0.00000000  |
| C | -2.59095283 | -2.78248123 | 0.00000000  |
| H | -3.30056749 | -3.60203343 | 0.00000000  |
| C | -1.14018967 | -2.95246201 | 0.00000000  |
| H | -0.62712948 | -3.90689145 | 0.00000000  |
| C | 2.39737628  | 0.80300817  | 0.00000000  |
| H | 3.00917085  | 0.57008819  | 0.88018397  |
| H | 3.00917085  | 0.57008819  | -0.88018397 |
| C | 2.78489313  | 3.34443103  | 0.00000000  |
| H | 3.86572744  | 3.24499598  | 0.00000000  |
| H | 2.38384442  | 4.35347182  | 0.00000000  |

**Table S69.** Cartesian coordinate of optimized structure of 5 ( $C_{2h}$ ) at the B3LYP/6-31G(d,p) level

|   |             |             |            |
|---|-------------|-------------|------------|
| C | -1.24823202 | 0.65525685  | 0.00000000 |
| C | -1.24823202 | -0.72462082 | 0.00000000 |
| C | 0.00091890  | -1.39841753 | 0.00000000 |

|   |             |             |            |
|---|-------------|-------------|------------|
| C | 1.24823202  | -0.65525685 | 0.00000000 |
| C | 1.24823202  | 0.72462082  | 0.00000000 |
| C | -0.00091890 | 1.39841753  | 0.00000000 |
| H | -2.17807406 | -1.29028146 | 0.00000000 |
| H | 2.17807406  | 1.29028146  | 0.00000000 |
| C | -2.31714992 | 1.62787358  | 0.00000000 |
| H | -3.37550704 | 1.39526327  | 0.00000000 |
| C | -1.75560205 | 2.89125916  | 0.00000000 |
| H | -2.29444310 | 3.83001467  | 0.00000000 |
| C | -0.32974598 | 2.75810687  | 0.00000000 |
| H | 0.37637114  | 3.58126007  | 0.00000000 |
| C | 2.31714992  | -1.62787358 | 0.00000000 |
| H | 3.37550704  | -1.39526327 | 0.00000000 |
| C | 1.75560205  | -2.89125916 | 0.00000000 |
| H | 2.29444310  | -3.83001467 | 0.00000000 |
| C | 0.32974598  | -2.75810687 | 0.00000000 |
| H | -0.37637114 | -3.58126007 | 0.00000000 |

**Table S70.** Cartesian coordinate of optimized structure of type (ii) reference compound for **5** at the B3LYP/6-31G(d,p) level

|   |             |             |             |
|---|-------------|-------------|-------------|
| C | -1.62938558 | -0.83338163 | -0.00000000 |
| C | -0.55854441 | -1.78335894 | -0.00000000 |
| C | 0.82833708  | -1.29528962 | -0.00000000 |
| C | 1.08731925  | 0.03796666  | 0.00000000  |
| C | 0.00000000  | 1.00565749  | 0.00000000  |
| H | -2.65784011 | -1.18573837 | -0.00000000 |
| H | 2.10770506  | 0.41547526  | 0.00000000  |
| C | -0.57053975 | 3.46730560  | 0.00000000  |
| H | -1.63965579 | 3.27129599  | 0.00000000  |
| C | 0.32891906  | 2.34316482  | 0.00000000  |
| H | 1.38960376  | 2.59239017  | 0.00000000  |
| C | 1.69575300  | -2.46595979 | 0.00000000  |
| H | 2.77787133  | -2.44547618 | 0.00000000  |
| C | 0.88872733  | -3.56851477 | -0.00000000 |
| H | 1.22166525  | -4.59995185 | 0.00000000  |
| C | -0.50951860 | -3.15703166 | -0.00000000 |
| H | -1.35654780 | -3.83296272 | -0.00000000 |
| C | -1.36533437 | 0.50256592  | -0.00000000 |
| H | -2.18491021 | 1.21194326  | -0.00000000 |
| C | -0.14901798 | 4.74704398  | 0.00000000  |
| H | 0.90912108  | 4.99509376  | 0.00000000  |
| H | -0.84730275 | 5.57692224  | 0.00000000  |

**Table S71.** Cartesian coordinate of optimized structure of diMe-6 ( $C_5$ ) at the B3LYP/6-31G(d,p) level

|   |             |             |             |
|---|-------------|-------------|-------------|
| C | -2.37042717 | 0.72697051  | 0.00000000  |
| C | -1.18033200 | 1.44351326  | 0.00000000  |
| C | 0.00038886  | 0.67690252  | 0.00000000  |
| C | -0.00038886 | -0.67690252 | 0.00000000  |
| C | -1.18033200 | -1.43990435 | 0.00000000  |
| C | -2.36974226 | -0.72352687 | 0.00000000  |
| H | -3.33468284 | 1.22857348  | 0.00000000  |
| C | 1.18033200  | 1.43990435  | 0.00000000  |
| C | 1.18033200  | -1.44351326 | 0.00000000  |
| H | -3.33477407 | -1.22426177 | 0.00000000  |
| C | 2.37042717  | -0.72697051 | 0.00000000  |
| C | 2.36974226  | 0.72352687  | 0.00000000  |
| H | 3.33468284  | -1.22857348 | 0.00000000  |
| H | 3.33477407  | 1.22426177  | 0.00000000  |
| C | 0.68037296  | -2.84471885 | 0.00000000  |
| H | 1.30067372  | -3.73373235 | 0.00000000  |
| C | -0.68962654 | -2.85781547 | 0.00000000  |
| C | 0.68962654  | 2.85781547  | 0.00000000  |
| C | -0.68037296 | 2.84471885  | 0.00000000  |
| H | -1.30067372 | 3.73373235  | 0.00000000  |
| C | -1.57528732 | -4.06295784 | 0.00000000  |
| H | -2.23078588 | -4.07429140 | 0.88005014  |
| H | -2.23078588 | -4.07429140 | -0.88005014 |
| H | -0.99294388 | -4.98806445 | 0.00000000  |
| C | 1.57528732  | 4.06295784  | 0.00000000  |

|   |            |            |             |
|---|------------|------------|-------------|
| H | 2.23078588 | 4.07429140 | 0.88005014  |
| H | 2.23078588 | 4.07429140 | -0.88005014 |
| H | 0.99294388 | 4.98806445 | 0.00000000  |

**Table S72.** Cartesian coordinate of optimized structure of type (i) reference compound for diMe-6 ( $C_s$ ) at the B3LYP/6-31G(d,p) level

|   |             |             |             |
|---|-------------|-------------|-------------|
| C | 2.38266827  | 0.71500421  | 0.00000000  |
| C | 1.19175260  | 1.42893396  | 0.00000000  |
| C | 0.00104227  | 0.68958943  | 0.00000000  |
| C | -0.00104227 | -0.68958943 | 0.00000000  |
| C | 1.19178866  | -1.43624984 | 0.00000000  |
| C | 2.38482379  | -0.71915867 | 0.00000000  |
| H | 3.34181754  | 1.22641149  | 0.00000000  |
| C | -1.19178866 | 1.43624984  | 0.00000000  |
| C | -1.19175260 | -1.42893396 | 0.00000000  |
| H | 3.34409324  | -1.22983240 | 0.00000000  |
| C | -2.38266827 | -0.71500421 | 0.00000000  |
| C | -2.38482379 | 0.71915867  | 0.00000000  |
| H | -3.34181754 | -1.22641149 | 0.00000000  |
| H | -3.34409324 | 1.22983240  | 0.00000000  |
| C | 0.77805892  | -2.85923661 | 0.00000000  |
| C | -0.77805892 | 2.85923661  | 0.00000000  |
| C | 0.77805892  | 2.89585724  | 0.00000000  |
| H | 1.15426120  | 3.43328459  | 0.87919198  |
| H | 1.15426120  | 3.43328459  | -0.87919198 |
| C | -0.77805892 | -2.89585724 | 0.00000000  |
| H | -1.15426120 | -3.43328459 | 0.87919198  |
| H | -1.15426120 | -3.43328459 | -0.87919198 |
| C | 1.56621226  | -3.94077567 | 0.00000000  |
| H | 1.15724074  | -4.94659076 | 0.00000000  |
| C | -1.56621226 | 3.94077567  | 0.00000000  |
| H | -1.15724074 | 4.94659076  | 0.00000000  |
| H | 2.64840264  | -3.85387880 | 0.00000000  |
| H | -2.64840264 | 3.85387880  | 0.00000000  |

**Table S73.** Cartesian coordinate of optimized structure of **6** ( $D_{2h}$ ) at the B3LYP/6-31G(d,p) level

|   |             |             |             |
|---|-------------|-------------|-------------|
| C | -0.00000000 | 2.37147125  | 0.72509226  |
| C | -0.00000000 | 1.18104204  | 1.44133722  |
| C | -0.00000000 | 0.00000000  | 0.67717341  |
| C | 0.00000000  | 0.00000000  | -0.67717341 |
| C | 0.00000000  | 1.18104204  | -1.44133722 |
| C | 0.00000000  | 2.37147125  | -0.72509226 |
| H | -0.00000000 | 3.33554435  | 1.22701107  |
| C | -0.00000000 | -1.18104204 | 1.44133722  |
| C | -0.00000000 | -1.18104204 | -1.44133722 |
| H | 0.00000000  | 3.33554435  | -1.22701107 |
| C | -0.00000000 | -2.37147125 | -0.72509226 |
| C | -0.00000000 | -2.37147125 | 0.72509226  |
| H | -0.00000000 | -3.33554435 | -1.22701107 |
| H | -0.00000000 | -3.33554435 | 1.22701107  |
| C | 0.00000000  | -0.68317421 | -2.84705436 |
| H | 0.00000000  | -1.30612299 | -3.73349884 |
| C | 0.00000000  | 0.68317421  | -2.84705436 |
| H | 0.00000000  | 1.30612299  | -3.73349884 |
| C | -0.00000000 | -0.68317421 | 2.84705436  |
| H | -0.00000000 | -1.30612299 | 3.73349884  |
| C | 0.00000000  | 0.68317421  | 2.84705436  |
| H | 0.00000000  | 1.30612299  | 3.73349884  |

**Table S74.** Cartesian coordinate of optimized structure of type (ii) reference compound for **6** at the B3LYP/6-31G(d,p) level

|   |             |             |             |
|---|-------------|-------------|-------------|
| C | -1.46345776 | 2.07357176  | -0.00000000 |
| C | -0.08672195 | 1.90775399  | 0.00000000  |
| C | 0.44954201  | 0.56551056  | 0.00000000  |
| C | -0.44954201 | -0.56551056 | 0.00000000  |
| C | -2.33735386 | 0.97537192  | -0.00000000 |

|   |             |             |             |
|---|-------------|-------------|-------------|
| H | -1.88394862 | 3.07338476  | 0.00000000  |
| C | 0.08672195  | -1.90775399 | -0.00000000 |
| H | -3.41005031 | 1.14488733  | -0.00000000 |
| C | 1.46345776  | -2.07357176 | 0.00000000  |
| C | 2.33735386  | -0.97537192 | 0.00000000  |
| H | 1.88394862  | -3.07338476 | -0.00000000 |
| H | 3.41005031  | -1.14488733 | 0.00000000  |
| C | -0.80513599 | -3.08339486 | 0.00000000  |
| H | -1.87064421 | -2.88216986 | 0.00000000  |
| C | 0.80513599  | 3.08339486  | 0.00000000  |
| H | 1.87064421  | 2.88216986  | 0.00000000  |
| C | 1.84669982  | 0.31045630  | 0.00000000  |
| H | 2.55250710  | 1.13073449  | 0.00000000  |
| C | 0.44954201  | 4.37513732  | 0.00000000  |
| H | -0.58179160 | 4.71393856  | 0.00000000  |
| H | 1.20590528  | 5.15283436  | 0.00000000  |
| C | -1.84669982 | -0.31045630 | -0.00000000 |
| H | -2.55250710 | -1.13073449 | -0.00000000 |
| C | -0.44954201 | -4.37513732 | -0.00000000 |
| H | -1.20590528 | -5.15283436 | 0.00000000  |
| H | 0.58179160  | -4.71393856 | -0.00000000 |

**Table S75.** Cartesian coordinate of optimized structure of Me-7 (C<sub>s</sub>) at the B3LYP/6-31G(d,p) level

|   |             |             |             |
|---|-------------|-------------|-------------|
| C | -0.76758208 | -2.00224245 | 0.00000000  |
| C | 0.00000000  | -0.79135982 | 0.00000000  |
| C | 1.36076781  | -1.01137298 | 0.00000000  |
| S | 1.66143423  | -2.74309272 | 0.00000000  |
| C | -0.86173294 | 0.38054327  | 0.00000000  |
| C | -2.24704251 | 0.01652490  | 0.00000000  |
| C | -0.66138324 | 1.74263454  | 0.00000000  |
| S | -2.21607699 | 2.55903257  | 0.00000000  |
| S | -2.52533132 | -1.73781446 | 0.00000000  |
| C | -0.01931381 | -3.14888804 | 0.00000000  |
| H | -0.34098572 | -4.17969751 | 0.00000000  |
| C | -3.11075226 | 1.08010071  | 0.00000000  |
| H | -4.19067961 | 1.08667817  | 0.00000000  |
| C | 0.52369204  | 2.58360173  | 0.00000000  |
| H | 0.27758659  | 3.64410557  | 0.00000000  |
| C | 1.85786601  | 2.34164583  | 0.00000000  |
| H | 2.42713566  | 3.26794160  | 0.00000000  |
| C | 2.76399153  | 1.17820548  | 0.00000000  |
| C | 2.54200446  | -0.16295766 | 0.00000000  |
| H | 3.45739074  | -0.75427113 | 0.00000000  |
| C | 4.24388702  | 1.57243790  | 0.00000000  |
| H | 4.76048362  | 1.17817990  | 0.88195479  |
| H | 4.76048362  | 1.17817990  | -0.88195479 |
| H | 4.38175805  | 2.65563683  | 0.00000000  |

**Table S76.** Cartesian coordinate of optimized structure of type (i) reference compound for Me-7 (C<sub>s</sub>) at the B3LYP/6-31G(d,p) level

|   |             |             |            |
|---|-------------|-------------|------------|
| C | 0.83061482  | 1.97432646  | 0.00000000 |
| C | -0.00000000 | 0.78071080  | 0.00000000 |
| C | -1.34260486 | 1.07447344  | 0.00000000 |
| S | -1.56385596 | 2.82350647  | 0.00000000 |
| C | 0.81627192  | -0.41196852 | 0.00000000 |
| C | 2.22305657  | -0.10248001 | 0.00000000 |
| C | 0.57550190  | -1.77430067 | 0.00000000 |
| S | 2.10982662  | -2.64783917 | 0.00000000 |
| S | 2.57441512  | 1.63707601  | 0.00000000 |
| C | 0.14564221  | 3.14502078  | 0.00000000 |
| H | 0.51500471  | 4.15982311  | 0.00000000 |
| C | 3.04652646  | -1.18871987 | 0.00000000 |
| H | 4.12593141  | -1.22708668 | 0.00000000 |
| C | -0.61248252 | -2.58011777 | 0.00000000 |
| H | -0.38405609 | -3.64483427 | 0.00000000 |
| C | -1.95022284 | -2.33648861 | 0.00000000 |
| H | -2.52189789 | -3.26230190 | 0.00000000 |
| C | -2.86867933 | -1.20352831 | 0.00000000 |
| C | -4.18175759 | -1.53437708 | 0.00000000 |
| H | -4.96307526 | -0.78027522 | 0.00000000 |



|   |             |             |             |
|---|-------------|-------------|-------------|
| C | -2.64396304 | 0.31667103  | 0.00000000  |
| H | -3.20766044 | 0.68193015  | 0.86764253  |
| H | -3.20766044 | 0.68193015  | -0.86764253 |
| H | -4.51018072 | -2.56840827 | 0.00000000  |

**Table S77.** Cartesian coordinate of optimized structure of type (ii) reference compound for **7** at the B3LYP/6-31G(d,p) level

|   |             |             |             |
|---|-------------|-------------|-------------|
| C | 0.35097652  | 1.73963171  | 0.00000000  |
| C | -0.00000000 | 0.34446484  | 0.00000000  |
| C | 1.10910425  | -0.49417507 | 0.00000000  |
| S | 2.57437759  | 0.48159154  | 0.00000000  |
| C | -1.44227915 | 0.16116543  | 0.00000000  |
| C | -2.13711123 | 1.42984042  | 0.00000000  |
| S | -3.96829026 | -0.34918900 | 0.00000000  |
| S | -1.04933916 | 2.83564502  | 0.00000000  |
| C | 1.69182934  | 1.97994712  | 0.00000000  |
| H | 2.22094246  | 2.92162408  | 0.00000000  |
| C | -3.49565835 | 1.32593815  | 0.00000000  |
| H | -4.24391830 | 2.10459529  | 0.00000000  |
| C | 3.48668357  | -2.71882758 | 0.00000000  |
| H | 3.90048179  | -1.71453510 | 0.00000000  |
| C | 2.04667735  | -2.88077697 | -0.00000000 |
| H | 1.70705104  | -3.91521879 | -0.00000000 |
| C | 1.06899526  | -1.93783261 | -0.00000000 |
| H | 0.05271074  | -2.32109319 | -0.00000000 |
| C | -2.32221913 | -0.89330924 | 0.00000000  |
| H | -2.11938648 | -1.95379270 | -0.00000000 |
| C | 4.33925436  | -3.75806669 | -0.00000000 |
| H | 3.98242816  | -4.78499321 | -0.00000000 |
| H | 5.41420336  | -3.61334428 | -0.00000000 |

**Table S78.** Cartesian coordinate of optimized structure of type (ii) reference compound for **8** at the B3LYP/6-31G(d,p) level

|   |             |             |             |
|---|-------------|-------------|-------------|
| C | 0.42327546  | 3.04334715  | -0.00000000 |
| C | 0.99198252  | 1.71141986  | 0.00000000  |
| C | -0.01440066 | 0.72708797  | 0.00000000  |
| S | -1.59054758 | 1.51280623  | 0.00000000  |
| C | 2.45928878  | 1.80661610  | 0.00000000  |
| C | 2.90280083  | 3.18981846  | 0.00000000  |
| S | 5.05083006  | 1.82686971  | 0.00000000  |
| S | 1.59054758  | 4.37252168  | 0.00000000  |
| C | 0.01440066  | -0.72708797 | -0.00000000 |
| C | -0.99198252 | -1.71141986 | -0.00000000 |
| S | 1.59054758  | -1.51280623 | -0.00000000 |
| C | -0.42327546 | -3.04334715 | 0.00000000  |
| C | -2.45928878 | -1.80661610 | 0.00000000  |
| S | -1.59054758 | -4.37252168 | 0.00000000  |
| C | -2.90280083 | -3.18981846 | -0.00000000 |
| S | -5.05083006 | -1.82686971 | 0.00000000  |
| C | -0.93412772 | 3.10405836  | 0.00000000  |
| H | -1.58242082 | 3.96763042  | 0.00000000  |
| C | 4.25227307  | 3.36730690  | -0.00000000 |
| H | 4.81971580  | 4.28595120  | -0.00000000 |
| C | -4.25227307 | -3.36730690 | 0.00000000  |
| H | -4.81971580 | -4.28595120 | 0.00000000  |
| C | 0.93412772  | -3.10405836 | -0.00000000 |
| H | 1.58242082  | -3.96763042 | -0.00000000 |
| C | 3.55119063  | 0.96578648  | 0.00000000  |
| H | 3.58984016  | -0.10777814 | 0.00000000  |
| C | -3.55119063 | -0.96578648 | 0.00000000  |
| H | -3.58984016 | 0.10777814  | 0.00000000  |

**Table S79.** Cartesian coordinate of optimized structure of type (ii) reference compound for **9** at the B3LYP/6-31G(d,p) level

|   |             |             |            |
|---|-------------|-------------|------------|
| C | -1.67258960 | -3.91002894 | 0.00000000 |
| C | -0.32635534 | -4.12066236 | 0.00000000 |
| C | 0.48136265  | -2.92434191 | 0.00000000 |
| C | -0.30582068 | -1.77514519 | 0.00000000 |
| S | -2.01749419 | -2.21088779 | 0.00000000 |
| H | -2.47548992 | -4.63274693 | 0.00000000 |

|   |             |             |             |
|---|-------------|-------------|-------------|
| C | 1.89670331  | -3.24725293 | 0.00000000  |
| C | 3.10069389  | -2.55428714 | 0.00000000  |
| C | 2.10827349  | -4.67553642 | 0.00000000  |
| S | 4.45618497  | -3.67683062 | 0.00000000  |
| C | 3.41491366  | -5.06226443 | 0.00000000  |
| H | 3.82953554  | -6.05988713 | 0.00000000  |
| S | 0.61093584  | -5.62642566 | 0.00000000  |
| C | 3.39431287  | -1.17795190 | 0.00000000  |
| C | 0.00000000  | -0.40969412 | 0.00000000  |
| C | 0.12209398  | 0.80611549  | -0.00000000 |
| C | -2.21167590 | 3.11031849  | -0.00000000 |
| S | -4.76528150 | 2.83809715  | 0.00000000  |
| C | -2.77580992 | 4.44016612  | 0.00000000  |
| C | -0.76586904 | 3.14775664  | -0.00000000 |
| C | -4.13821803 | 4.46435479  | -0.00000000 |
| S | -1.54548392 | 5.72720837  | -0.00000000 |
| C | 0.24648058  | 2.19815720  | -0.00000000 |
| C | -0.26319827 | 4.49292204  | -0.00000000 |
| H | -4.81220805 | 5.30813925  | -0.00000000 |
| S | 1.81816427  | 3.00007588  | -0.00000000 |
| C | 1.09836929  | 4.58303263  | -0.00000000 |
| H | 1.72628814  | 5.46216259  | -0.00000000 |
| C | 3.74942906  | -0.01925364 | 0.00000000  |
| H | 4.04034347  | 1.00512480  | -0.00000000 |
| C | -3.18025853 | 2.13886057  | 0.00000000  |
| H | -3.05790147 | 1.06581952  | 0.00000000  |

**Table S80.** Cartesian coordinate of optimized structure of type (ii) reference compound for **10** at the B3LYP/6-31G(d,p) level

|   |             |             |            |
|---|-------------|-------------|------------|
| C | -1.01495652 | 1.60699826  | 0.00000000 |
| C | 1.82231828  | 3.49897035  | 0.00000000 |
| C | -1.82226364 | 2.74421793  | 0.00000000 |
| C | -1.50619271 | 4.10151764  | 0.00000000 |
| S | -3.57572795 | 2.52766497  | 0.00000000 |
| C | -2.68963594 | 4.92399322  | 0.00000000 |
| C | -0.30128664 | 4.90919922  | 0.00000000 |
| S | -2.35571965 | 6.66654556  | 0.00000000 |
| C | -0.61536933 | 6.31766138  | 0.00000000 |
| C | 1.07069602  | 4.68921922  | 0.00000000 |
| S | 1.93497227  | 6.22100975  | 0.00000000 |
| C | -0.36832975 | 0.56582169  | 0.00000000 |
| C | -1.82226364 | -3.49885137 | 0.00000000 |
| C | -1.07071389 | -4.68914673 | 0.00000000 |
| C | 0.30126117  | -4.90918543 | 0.00000000 |
| S | -1.93505359 | -6.22089656 | 0.00000000 |
| C | 1.50619782  | -4.10155244 | 0.00000000 |
| C | 0.61528435  | -6.31765789 | 0.00000000 |
| C | 1.82231867  | -2.74426842 | 0.00000000 |
| C | 2.68961040  | -4.92407611 | 0.00000000 |
| S | 2.35562064  | -6.66661806 | 0.00000000 |
| C | 1.01506224  | -1.60701283 | 0.00000000 |
| S | 3.57579523  | -2.52778104 | 0.00000000 |
| C | 0.36844546  | -0.56583023 | 0.00000000 |
| C | 0.46770486  | 7.14507700  | 0.00000000 |
| H | 0.50019423  | 8.22491694  | 0.00000000 |
| C | -3.86765670 | 4.23659783  | 0.00000000 |
| H | -4.87830597 | 4.61852566  | 0.00000000 |
| C | -0.46782283 | -7.14502885 | 0.00000000 |
| H | -0.50035485 | -8.22486715 | 0.00000000 |
| C | 3.86765742  | -4.23672679 | 0.00000000 |
| H | 4.87829271  | -4.61869217 | 0.00000000 |
| C | 2.52758827  | 2.51403116  | 0.00000000 |
| H | 3.10878862  | 1.62117905  | 0.00000000 |
| C | -2.52737900 | -2.51379968 | 0.00000000 |
| H | -3.10845243 | -1.62086514 | 0.00000000 |
